# Supplementary material for: Transcriptome of the Southern Muriqui Brachyteles arachnoides (Primates:Platyrrhini), a Critically Endangered New World Monkey: Evidence of Adaptive Evolution
Source: PubMed Central journal article supplement (PMC7412869; doi:10.3389/fgene.2020.00831), 2020-07-31
Supplement: Image_3.pdf [file Image_3.pdf]

**Supplementary Figure 3: Multi-species alignments of the proteins with positively selected sites identified by CODEML and FEL.** To prepare the images, aligned coding sequences were converted to amino acid sequences in SeaView, manually re-numbered and colorized in DNATagger (<https://bioinfo.inca.gov.br/DNATagger>). Protein domains identified by interproscan in the following databases: Hamap, ProSiteProfiles, ProSitePatterns, Pfam, TIGRFAM, SMART, PRINTS, SFLD, CDD, Gene3D, ProDom, PIRSF, PANTHER, SUPERFAMILY, were manually added to the alignments.

AKAP11

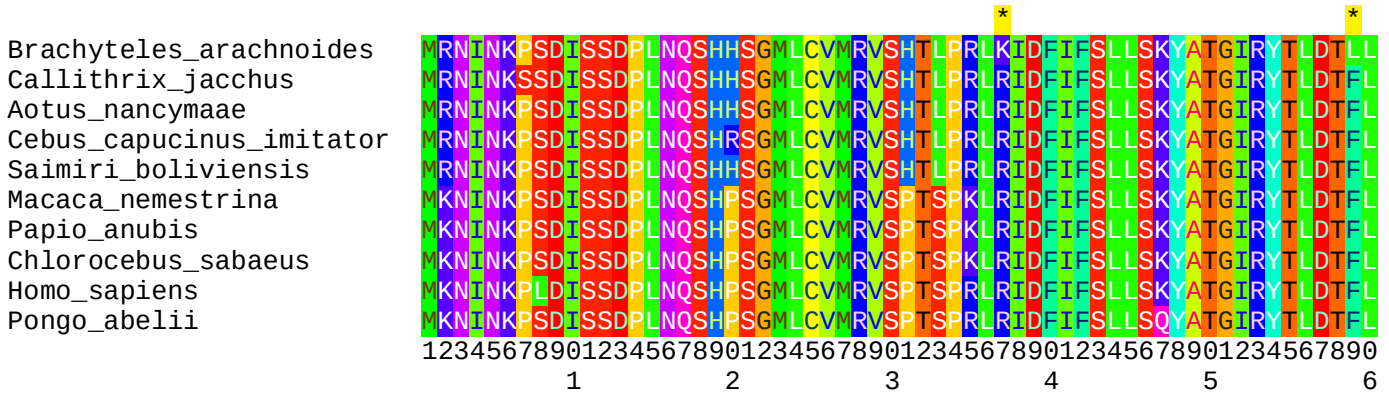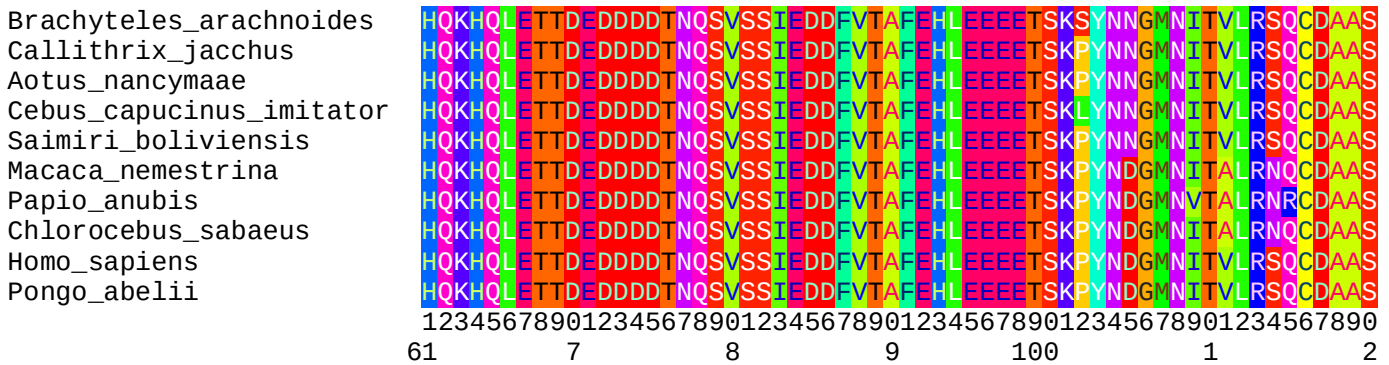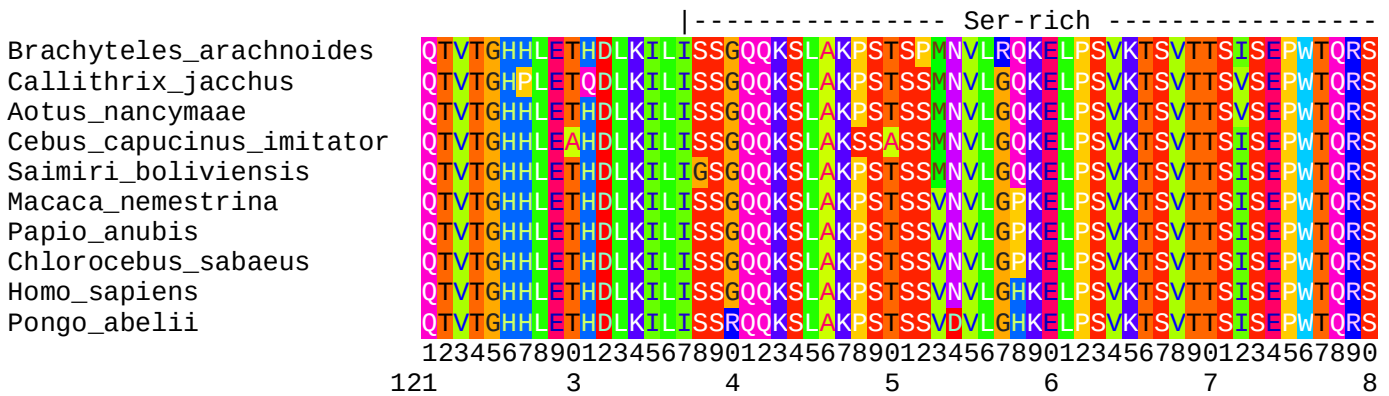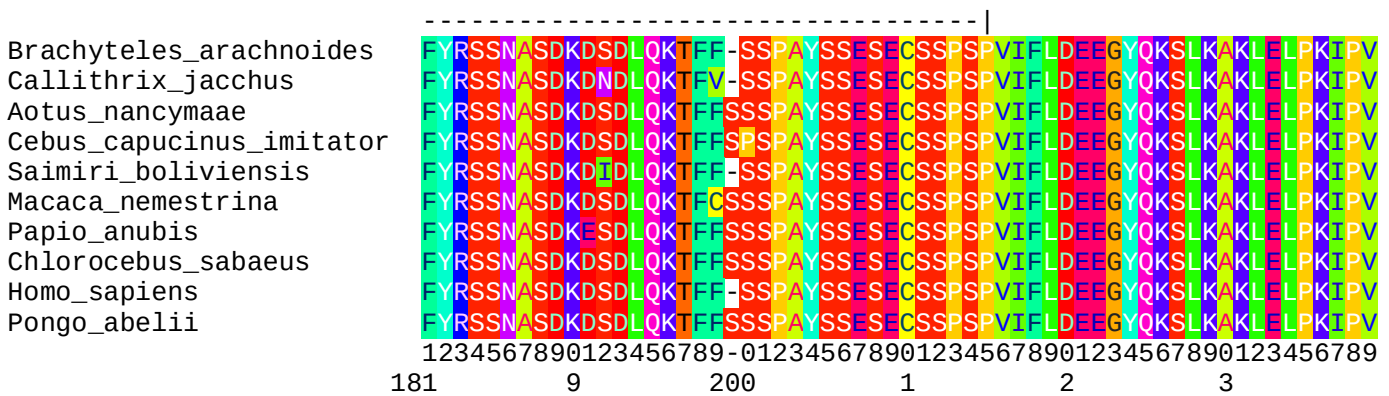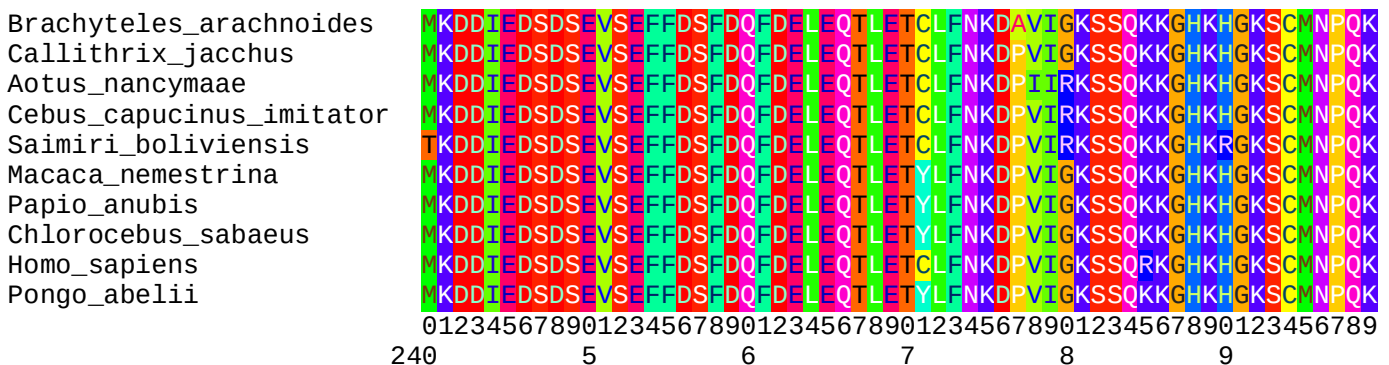

Brachyteles\_arachnoides  
 Callithrix\_jacchus  
 Aotus\_nancymaae  
 Cebus\_capucinus\_imitator  
 Saimiri\_boliviensis  
 Macaca\_nemestrina  
 Papio\_anubis  
 Chlorocebus\_sabaeus  
 Homo\_sapiens  
 Pongo\_abelii

012345678901234567890123456789012345678901234567890123456789

300 1 2 3 4 5

Brachyteles\_arachnoides  
 Callithrix\_jacchus  
 Aotus\_nancymaae  
 Cebus\_capucinus\_imitator  
 Saimiri\_boliviensis  
 Macaca\_nemestrina  
 Papio\_anubis  
 Chlorocebus\_sabaeus  
 Homo\_sapiens  
 Pongo\_abelii

012345678901234567890123456789012345678901234567890123456789

360 7 8 9 400 1

Brachyteles\_arachnoides  
 Callithrix\_jacchus  
 Aotus\_nancymaae  
 Cebus\_capucinus\_imitator  
 Saimiri\_boliviensis  
 Macaca\_nemestrina  
 Papio\_anubis  
 Chlorocebus\_sabaeus  
 Homo\_sapiens  
 Pongo\_abelii

012345678901234567890123456789012345678901234567890123456789

420 3 4 5 6 7

Brachyteles\_arachnoides  
 Callithrix\_jacchus  
 Aotus\_nancymaae  
 Cebus\_capucinus\_imitator  
 Saimiri\_boliviensis  
 Macaca\_nemestrina  
 Papio\_anubis  
 Chlorocebus\_sabaeus  
 Homo\_sapiens  
 Pongo\_abelii

012345678901234567890123456789012345678901234567890123456789

480 9 500 1 2 3

Brachyteles\_arachnoides  
 Callithrix\_jacchus  
 Aotus\_nancymaae  
 Cebus\_capucinus\_imitator  
 Saimiri\_boliviensis  
 Macaca\_nemestrina  
 Papio\_anubis  
 Chlorocebus\_sabaeus  
 Homo\_sapiens  
 Pongo\_abelii

012345678901234567890123456789012345678901234567890123456789

540 5 6 7 8 9



Brachyteles\_arachnoides  
 Callithrix\_jacchus  
 Aotus\_nancymaae  
 Cebus\_capucinus\_imitator  
 Saimiri\_boliviensis  
 Macaca\_nemestrina  
 Papio\_anubis  
 Chlorocebus\_sabaeus  
 Homo\_sapiens  
 Pongo\_abelii

8901234567890123456789012345678901234567890123456789012345678901234567  
 900 1 2 3 4 5

Brachyteles\_arachnoides  
 Callithrix\_jacchus  
 Aotus\_nancymaae  
 Cebus\_capucinus\_imitator  
 Saimiri\_boliviensis  
 Macaca\_nemestrina  
 Papio\_anubis  
 Chlorocebus\_sabaeus  
 Homo\_sapiens  
 Pongo\_abelii

8901234567890123456789012345678901234567890123456789012345678901234567  
 960 7 8 9 1000 1

Brachyteles\_arachnoides  
 Callithrix\_jacchus  
 Aotus\_nancymaae  
 Cebus\_capucinus\_imitator  
 Saimiri\_boliviensis  
 Macaca\_nemestrina  
 Papio\_anubis  
 Chlorocebus\_sabaeus  
 Homo\_sapiens  
 Pongo\_abelii

8901234567890123456789012345678901234567890123456789012345678901234567  
 1020 3 4 5 6 7

Brachyteles\_arachnoides  
 Callithrix\_jacchus  
 Aotus\_nancymaae  
 Cebus\_capucinus\_imitator  
 Saimiri\_boliviensis  
 Macaca\_nemestrina  
 Papio\_anubis  
 Chlorocebus\_sabaeus  
 Homo\_sapiens  
 Pongo\_abelii

8901234567890123456789012345678901234567890123456789012345678901234567  
 1080 9 1100 1 2 3

Brachyteles\_arachnoides  
 Callithrix\_jacchus  
 Aotus\_nancymaae  
 Cebus\_capucinus\_imitator  
 Saimiri\_boliviensis  
 Macaca\_nemestrina  
 Papio\_anubis  
 Chlorocebus\_sabaeus  
 Homo\_sapiens  
 Pongo\_abelii

8901234567890123456789012345678901234567890123456789012345678901234567  
 1140 5 6 7 8 9



PKA-RII subunit binding

Brachyteles\_arachnoides
Callithrix\_jacchus
Aotus\_nancymaae
Cebus\_capucinus\_imitator
Saimiri\_boliviensis
Macaca\_nemestrina
Papio\_anubis
Chlorocebus\_sabaeus
Homo\_sapiens
Pongo\_abelii

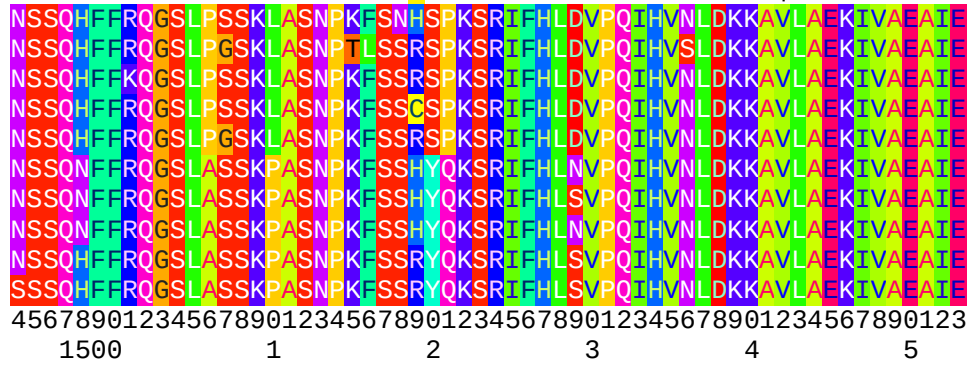

Brachyteles\_arachnoides
Callithrix\_jacchus
Aotus\_nancymaae
Cebus\_capucinus\_imitator
Saimiri\_boliviensis
Macaca\_nemestrina
Papio\_anubis
Chlorocebus\_sabaeus
Homo\_sapiens
Pongo\_abelii

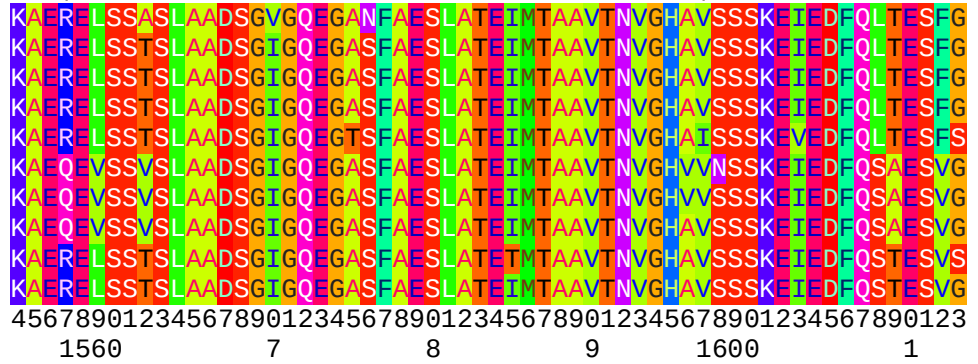

Brachyteles\_arachnoides
Callithrix\_jacchus
Aotus\_nancymaae
Cebus\_capucinus\_imitator
Saimiri\_boliviensis
Macaca\_nemestrina
Papio\_anubis
Chlorocebus\_sabaeus
Homo\_sapiens
Pongo\_abelii

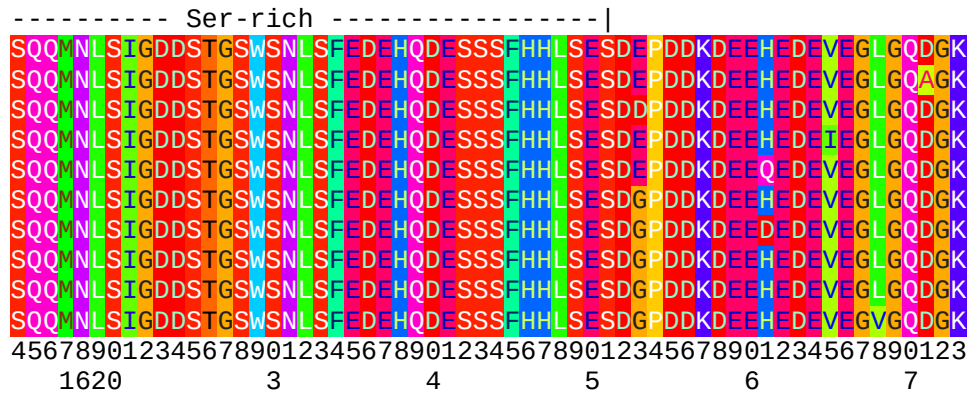

Brachyteles\_arachnoides
Callithrix\_jacchus
Aotus\_nancymaae
Cebus\_capucinus\_imitator
Saimiri\_boliviensis
Macaca\_nemestrina
Papio\_anubis
Chlorocebus\_sabaeus
Homo\_sapiens
Pongo\_abelii

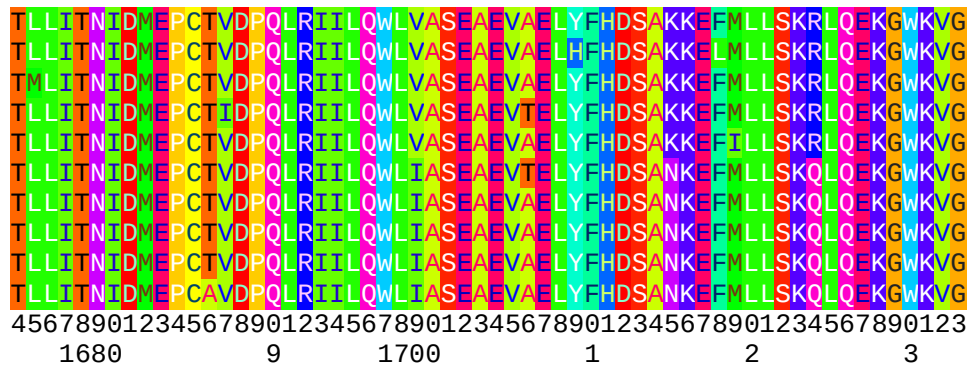

Brachyteles\_arachnoides
Callithrix\_jacchus
Aotus\_nancymaae
Cebus\_capucinus\_imitator
Saimiri\_boliviensis
Macaca\_nemestrina
Papio\_anubis
Chlorocebus\_sabaeus
Homo\_sapiens
Pongo\_abelii

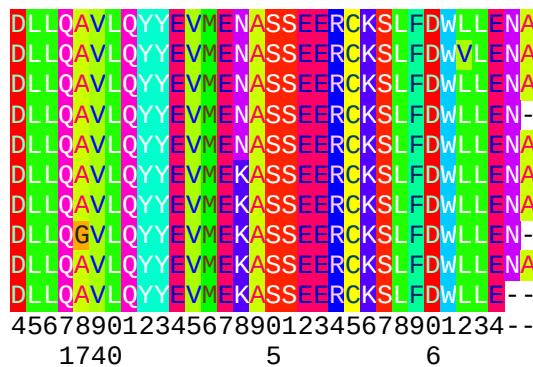

**APOBEC3G**

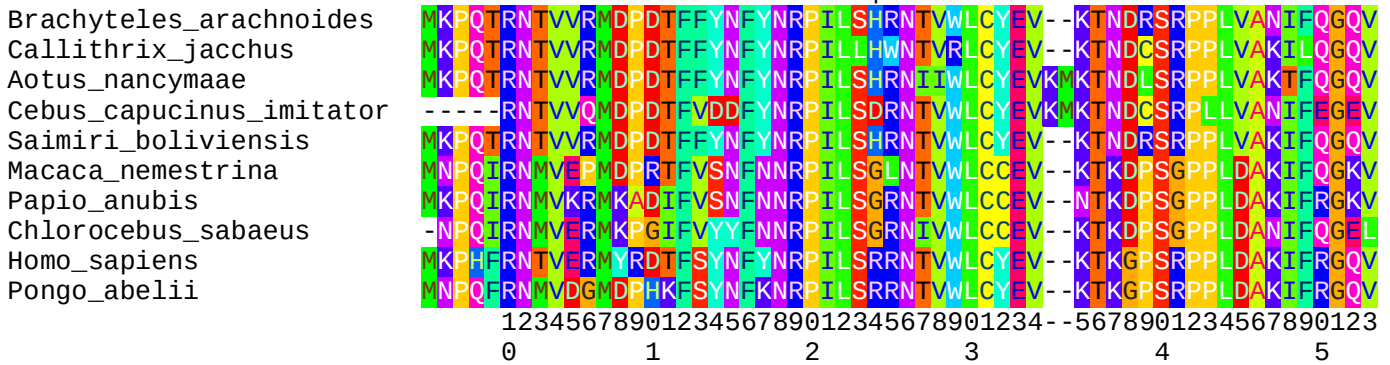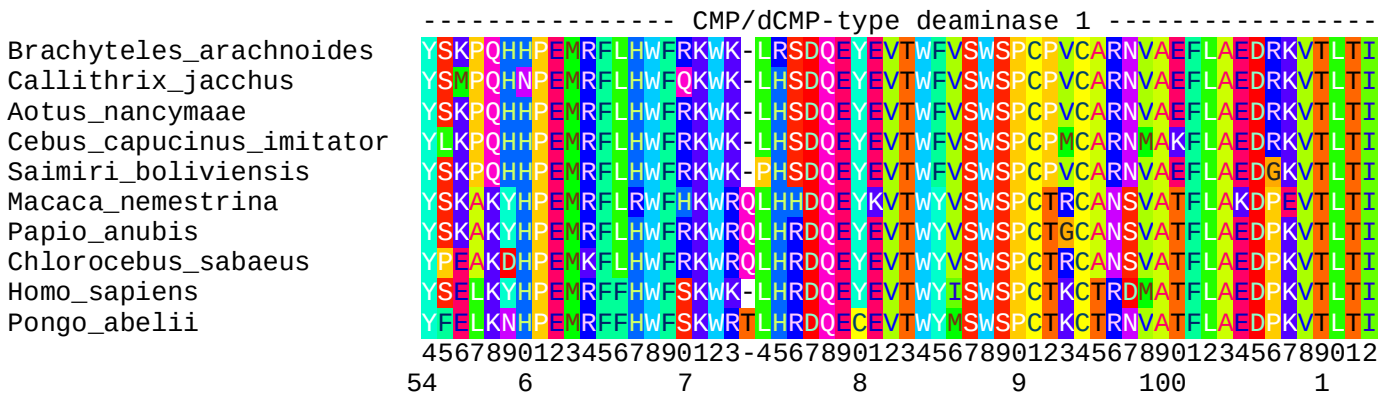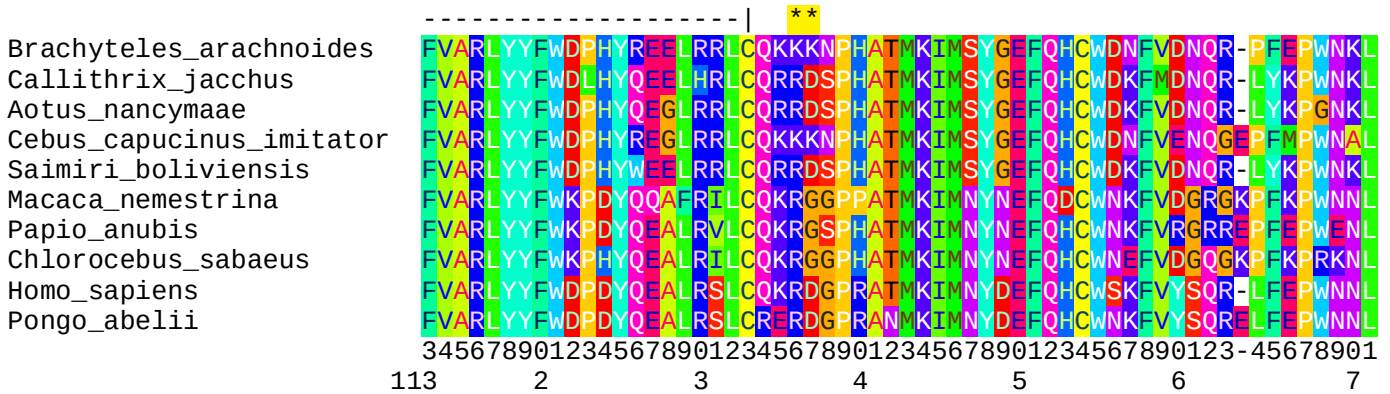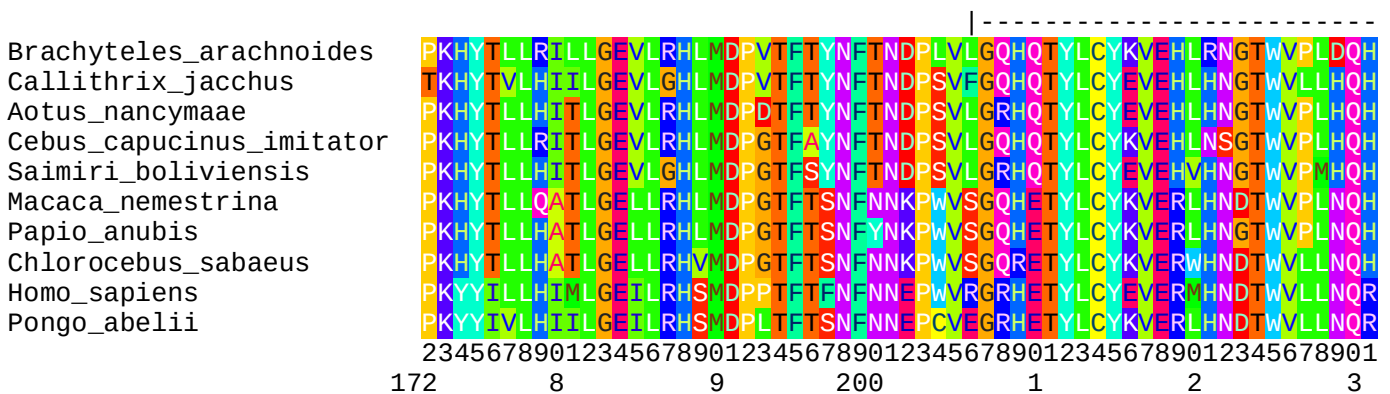



-- CMP/dCMP-type deaminase 2 -----

|----- zinc-binding -----|

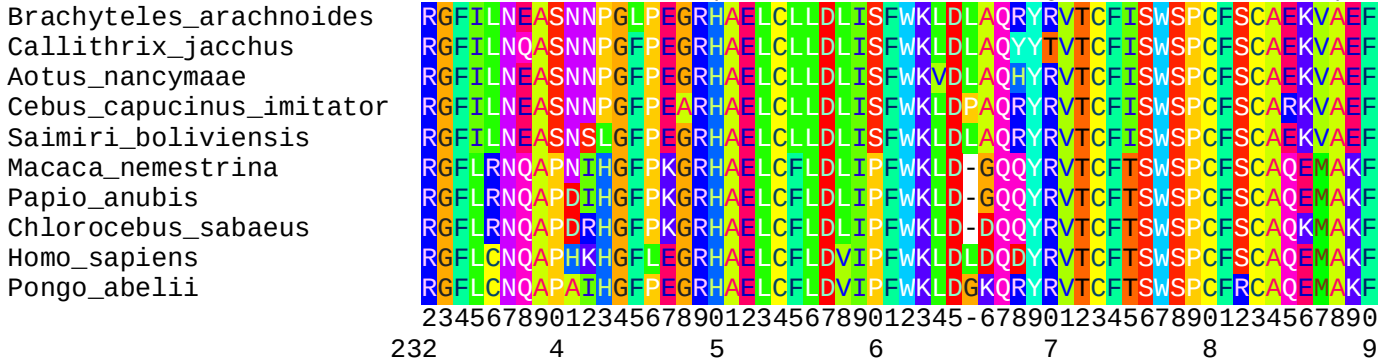

-----|

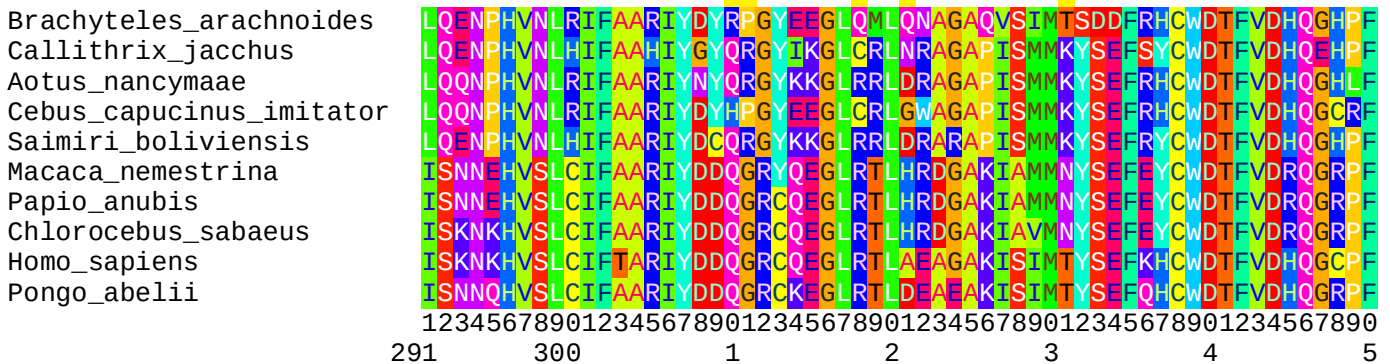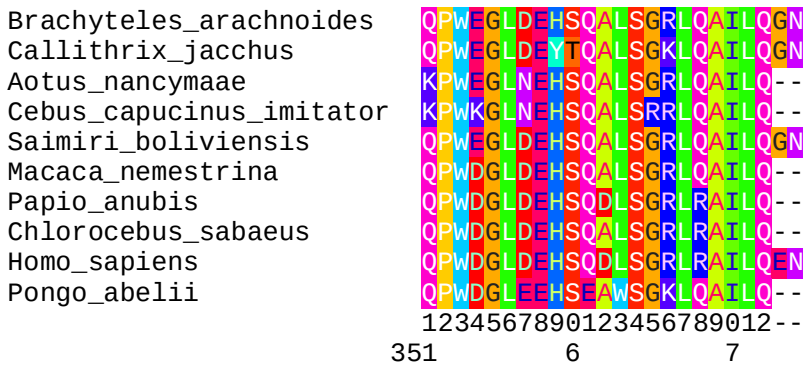

BMS1

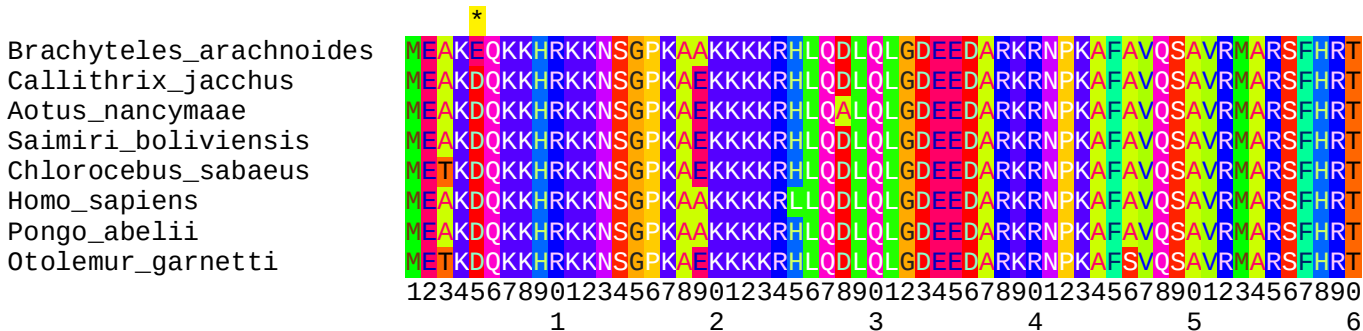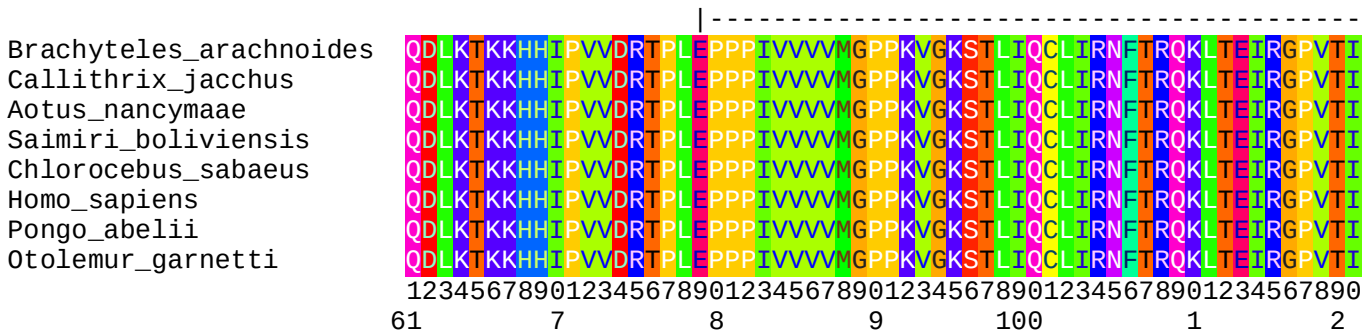

Bms1-type guanine nucleotide-binding (G) domain

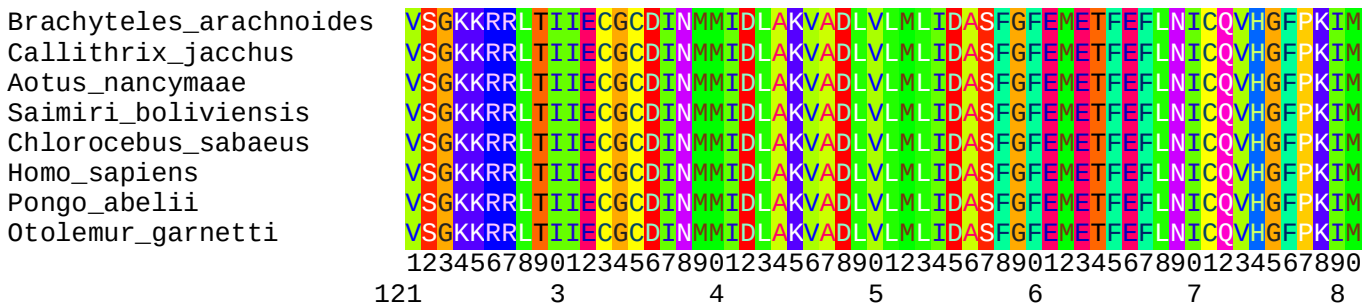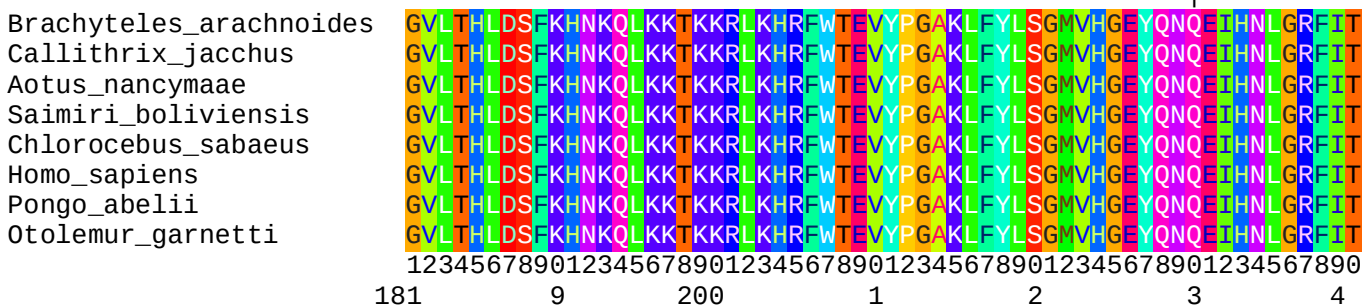

AARP2CN (NUC121) domain

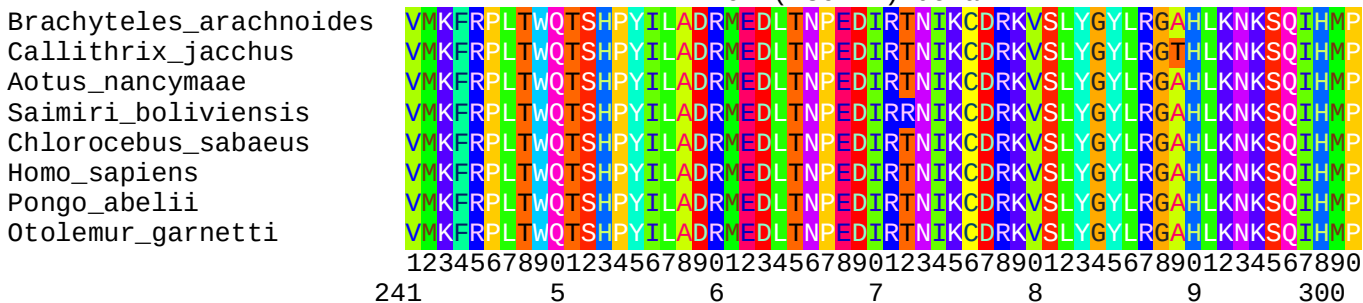

-----|

Brachyteles\_arachnoides GVGDFTVSDVSLFLPDPICALPEQQKKRCLNEKEKLVYAPLSGVGGVLYDKDAVYVDLGGSH

Callithrix\_jacchus GIGDFTVSDVSLFLPDPICALPEQQKKRCLNEKEKLVYAPLSGVGGVLYDKDAVYVDLGGSH

Aotus\_nancymaae GVGDFTVSDVSLFLPDPICALPEQQKKRCLNEKEKLVYAPLSGVGGVLYDKDAVYVDLGGSH

Saimiri\_boliviensis GVGDFTVSDVSLFLPDPICALPEQQKKRCLNEKEKLVYAPLSGVGGVLYDKDAVYVDLGGSH

Chlorocebus\_sabaeus GVGDFAVSDISFLPDPICALPEQQKKRCLNEKEKLVYAPLSGVGGVLYDKDAVYVDLGGSH

Homo\_sapiens GVGDFAVSDISFLPDPICALPEQQKKRCLNEKEKLVYAPLSGVGGVLYDKDAVYVDLGGSH

Pongo\_abelii GVGDFAVSDISFLPDPICALPEQQKKRCLNEKEKLVYAPLSGVGGVLYDKDAVYVDLGGSH

Otolemur\_garnetti GVGDFAVSDVSLFLPDPICALPEQQKKRCLNEKEKLVYAPLSGVGGVLYDKDAVYVDLGGSH

12345678901234567890123456789012345678901234567890

301 1 2 3 4 5 6

Brachyteles\_arachnoides GFQ--DEVGSTHELVSQSLISTHSTIDAKMASSRVMLFSDSKALGSEIDNQGLLMPKEEK

Callithrix\_jacchus GFQ--DEVGSTHELVSQSLISTHSTIDAKMASSRVMLFSDSKALGSEIDNQGLLMPKEEK

Aotus\_nancymaae GFQALDEVGSTHELVSQSLISTHSTIDAKMASSRVMLFSDSKALGSEIDNQGLLMLKEEK

Saimiri\_boliviensis GFQ--DEVGSTHELVSQSLISTHSTIDAKMASSRVMLFSDSKALGSEIDNQGLLIPKEEK

Chlorocebus\_sabaeus GFQ--DEVGPTHELVSQSLISTHSTIDAKMASSRVTLFSDSKPLGSEIDLNQGLLMPKEEK

Homo\_sapiens VFQ--DEVGPTHELVSQSLISTHSTIDAKMASSRVTLFSDSKPLGSEIDLNQGLMMPKEEK

Pongo\_abelii GFQ--DEVGPTHELVSQSLISTHSTIDAKMASSRVTLFSDSKPLGSEIDLNQGLMMPKEEK

Otolemur\_garnetti GFQAADEVGPTHELVSQSLISTHSTIDAKMASSRVTLFSDSKPLGSEIDLNQGLWMPKEEK

123--4567890123456789012345678901234567890123456789012345678

361 7 8 9 400 1

Brachyteles\_arachnoides QMDLKTGRMRRKAIFSD-EDSGSDSDEEDDEMSEDDGLENGSSDEEADEEENA EVTD--

Callithrix\_jacchus QMDLKTGRMRRKAVFGD-EDSGSDSDEEGDEMSEDDGLENGSSDEEAVEEENA EVTE--

Aotus\_nancymaae QMDLKTGRMRRKAIFGD-EDSGSDSDEEDDEMSEDDGLENGSSDEEAEEEENA EVTD--

Saimiri\_boliviensis QMDLKTGRMRRKAIFGD-EDSGSDSDEEDDEMSEDDGLENGSSDEEAEEEENA EVTD--

Chlorocebus\_sabaeus QMDLKTGRMRRKAIFGD-EDESGSDSDEENDEISEDDLLENGSSDEEAEEEENA EMTD--

Homo\_sapiens QMDLNTGRMRRKAIFGD-EDESGSDSDEEDDEMSEDDGLENGSSDEEAEEEENA EMTD--

Pongo\_abelii QMDLKTGRMRRKAIFGD-EDEPGSDSDEEDDEVESEDDGLENGSSDEEAEEEENA EMTD--

Otolemur\_garnetti QMDVKTGRVRRKAIFGDEEDESSEDEEDDEM SAGDRSENDSDDNTEEEEDAKMTDKS

90123456789012345-6789012345678901234567890123456789012345--

420 3 4 5 6 7

Brachyteles\_arachnoides ECVTAKGVKRRKL-ELEEDSEVDLPAFADSDDDL EESSAEEGEVEGAGESSEEDDRSA-G

Callithrix\_jacchus ECMTAKGVKRRKL-ELEEDSEVDLPAFADSDDDL ERSSAEEGEAEAADESSEEDD CSA-G

Aotus\_nancymaae EYMIKAGIKRRKLELEEDSEVDLPAFADSDDDL EKSSAEEGEVEEAADESSEEDD CSS-G

Saimiri\_boliviensis ECMTAKGIKRRKLESEEDSEVDLPAFADSDDDL ERSSGEEGEVEEAADESSEGED CSA-G

Chlorocebus\_sabaeus QYMAGKGVKRRKLELEEDSEVDLPAFADSDDDL ERSSVEEGEAEAADESSEEDD CTA-G

Homo\_sapiens QYMAVKGIKRRKLELEEDSEMPLPAFADSDDDL ERSSAEEGEAEAADESSEEDD CTA-G

Pongo\_abelii QYMAIKGVKRRKLELEEDGEMPLPAFADSDDDL ERSSAEEGEAEAADESSEEDD CTA-G

Otolemur\_garnetti KYRTVKGVKRRKLEGLEEDSDLPLPAFADSDDDL ERSSGEEGEVEEAAESSEEDD VTTGG

6789012345678-90123456789012345678901234567890123456789012-3

476 8 9 500 1 2 3

Brachyteles\_arachnoides ERGISGSKAVGEGSDAELSPANRQSDRVNLEKSLLMKKAALTTSDSGHCTAEEVFASEDE

Callithrix\_jacchus EKGISGSKAVREGSKAELSPANHQDRVNLEKSLLMKKAALTTSDSGHCTAEEVFASEDE

Aotus\_nancymaae ERGISGSKAVGEGSKAELSPSNHQSDPVNLEKSLPMKKAALTTSDSGHCTAEEVFASEDD

Saimiri\_boliviensis ERGISGSKAVGEGSKAELSPANHQSDRVNLEKSLPMKKAALTTSDSGHCTAEEVFASEDE

Chlorocebus\_sabaeus EGGISGSKAVGEGSEAGLSPANCRSDRVNLEKSLLMKKAALMTSDSGHCTAEEVFASEDE

Homo\_sapiens EKGISGSKAAGEGSKAGLSPANCSQSDRVNLEKSLLMKKAALPTFDSGHCTAEEVFASEDE

Pongo\_abelii EKGISGSKAAGEGSKAGLSPANCSQSDRVNLEKSLLMKKAALPTFDSGHCTAEEVFASEDE

Otolemur\_garnetti GRDILELKAVEESGKTGSLPASHWGDSVNLKSLPLEKKAALPTSDSGHCTAEEVFASEDE

456789012345678901234567890123456789012345678901234567890123

534 4 5 6 7 8 9

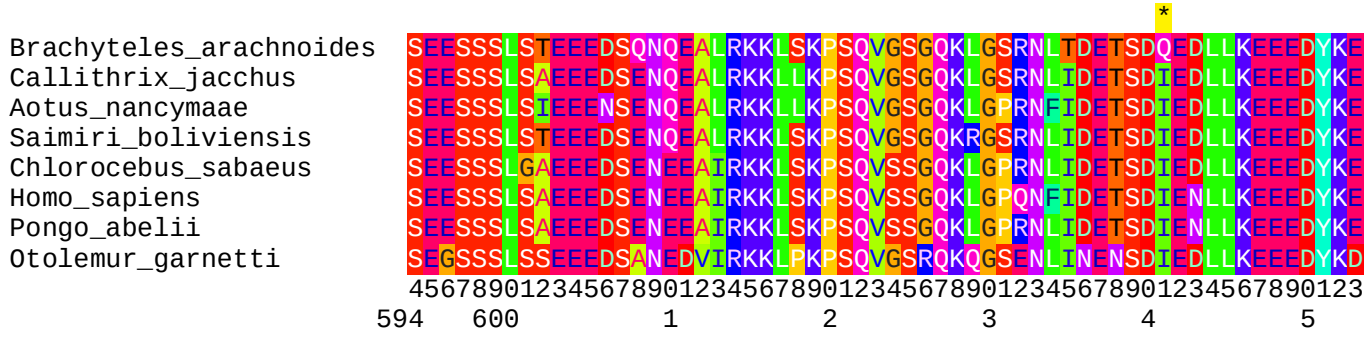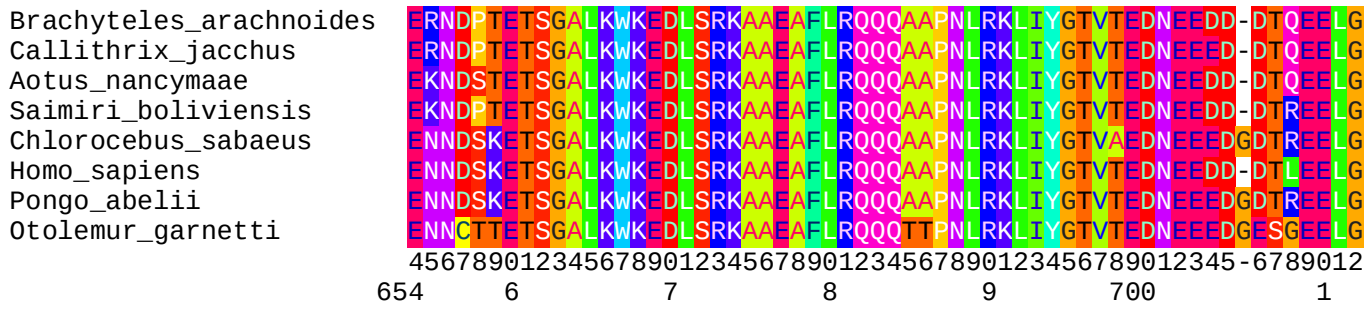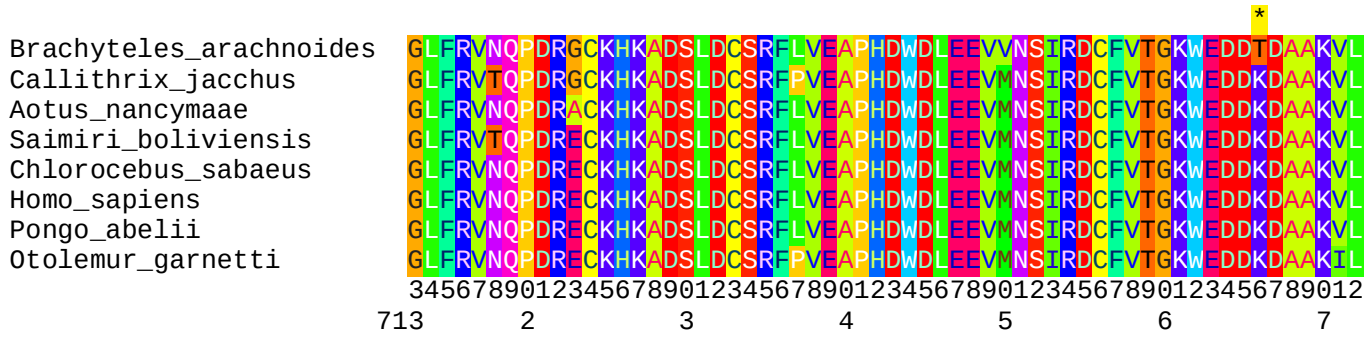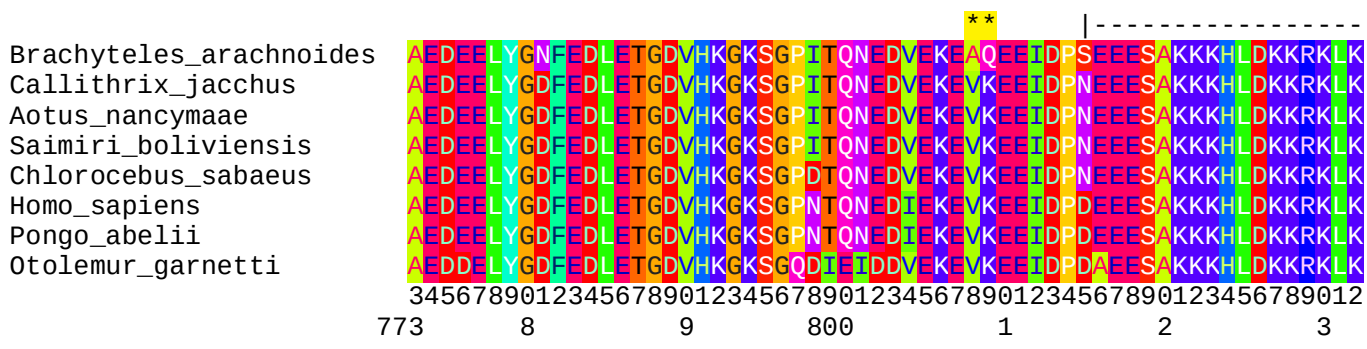

40S ribosome biogenesis protein Tsr1 and BMS1 C-terminal

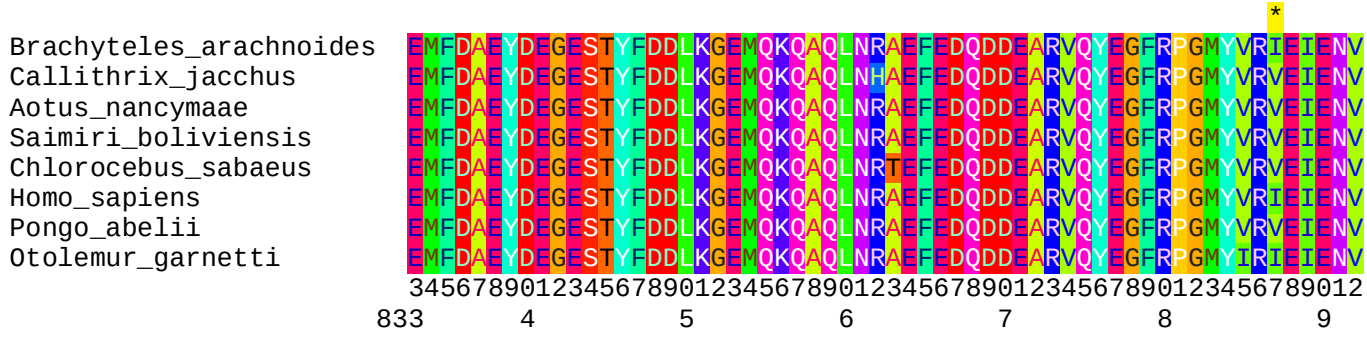

40S ribosome biogenesis protein Tsr1 and BMS1 C-terminal

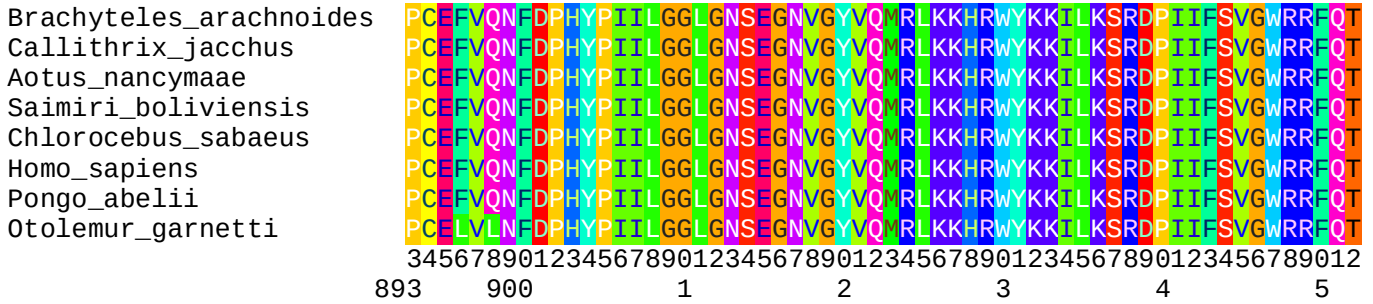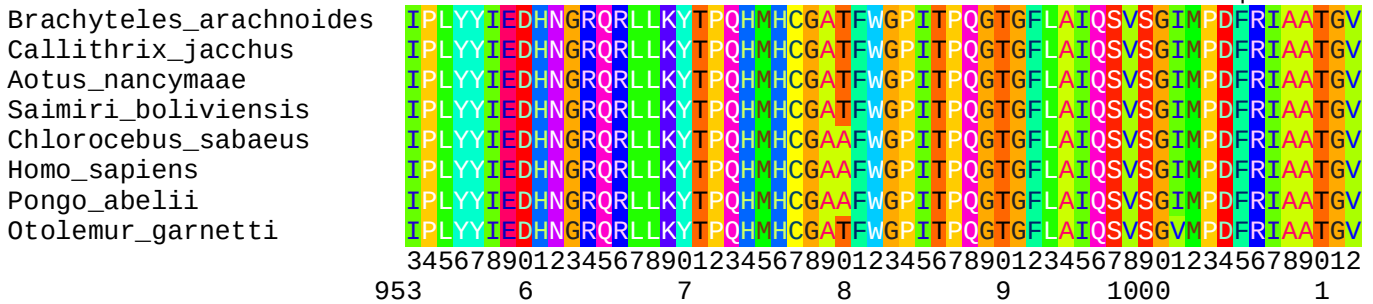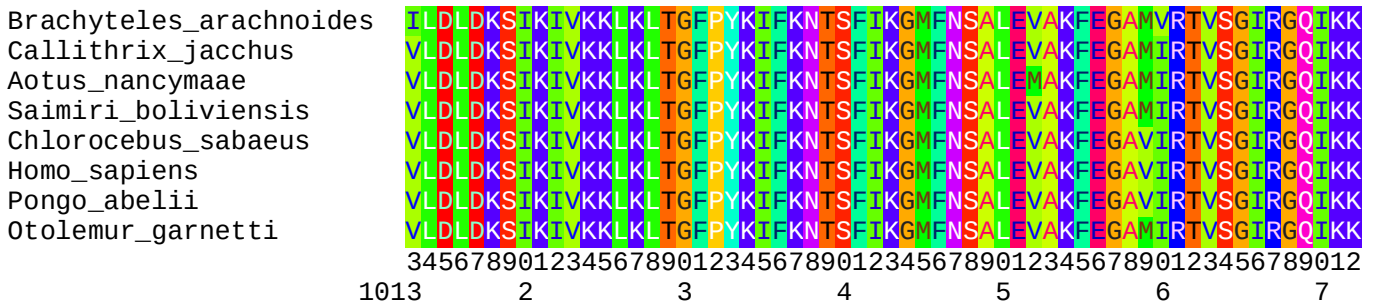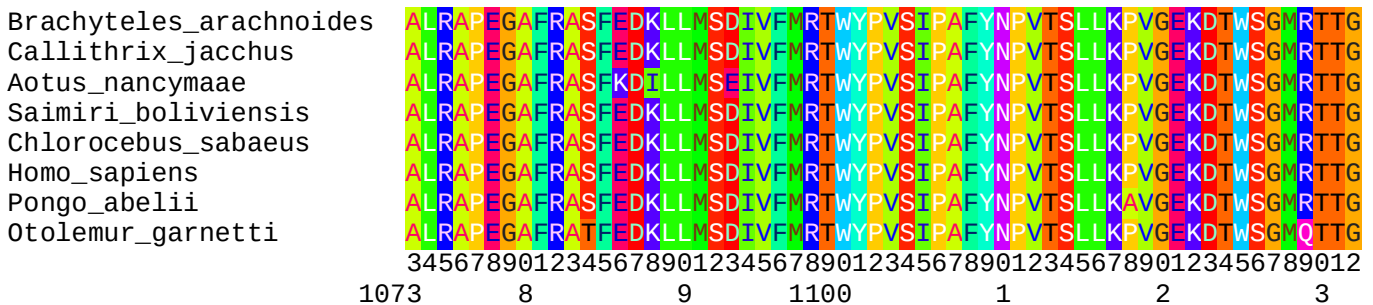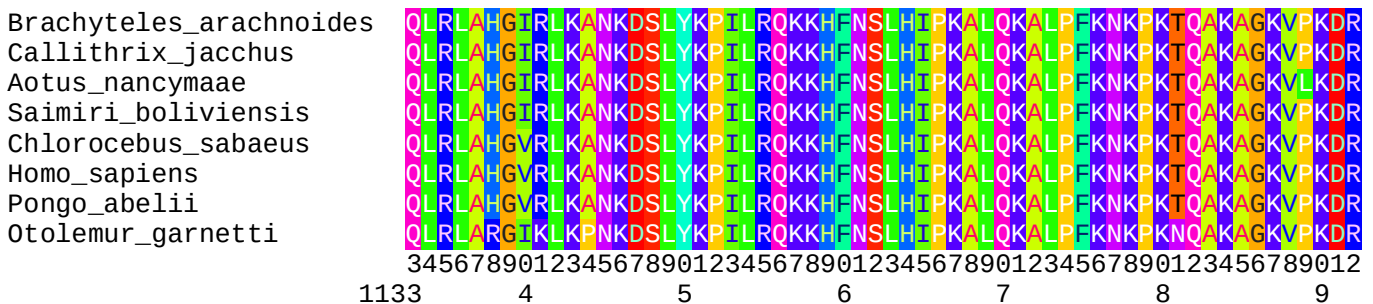



CEACAM1

|----- Signal peptide -----|----- Ig-like V-type -----

Brachyteles\_arachnoides  
 Callithrix\_jacchus  
 Aotus\_nancymaae  
 Cebus\_capucinus\_imitator  
 Saimiri\_boliviensis  
 Macaca\_nemestrina  
 Chlorocebus\_sabaeus  
 Homo\_sapiens  
 Pongo\_abelii

MGHL<sup>\*</sup>SVQLRRVCVPWQGLLLTASLLTFWNPQTS<sup>\*</sup>AQLTIESVPSNAAEGKEVLLLTYNLPE  
 MGHL<sup>\*</sup>SARLHRVCVPWQGLLLTASLLTFWNLPTSAQLTTESMPSNAAEGKEVLLLTYNVPO  
 MGHL<sup>\*</sup>SARLHRVCVPWQGLLLTASLLTFWNPPTSAQLTIESMPSNAAEGKEVLLLT<sup>\*</sup>HNLPQ  
 MGHL<sup>\*</sup>SARLHRVCVPWQGLLLTASLLTFWNPPTSAQLTIESVPSNAAEGKDVLLLT<sup>\*</sup>HNLPQ  
 MGHL<sup>\*</sup>SAQLHRVCVPWQGLLLTASLLTFWNPPTSAQLTIESVPSNAAEGKEVLLLT<sup>\*</sup>ARNLPQ  
 MGHL<sup>\*</sup>STPLHRVRVPWQGLLLTASLLTFWSPPTTAQLTIESRPFNVAEGKEVLLLT<sup>\*</sup>AHNLSQ  
 MGHL<sup>\*</sup>STPLHRVRVPWQGLLLTASLLTFWNPPTTAQLTIESRPFNVAEGKEVLLLT<sup>\*</sup>AHNLPQ  
 MGHL<sup>\*</sup>SAPLHRVRVPWQGLLLTASLLTFWNPPTTAQLTTESM<sup>\*</sup>PFNVAEGKEVLLLT<sup>\*</sup>VHNLPO  
 MGHL<sup>\*</sup>SAPLHRVRVPWQGLLLTASLLTFWNPPTTAQLTTES<sup>\*</sup>TPFNVAEGKEVLLLT<sup>\*</sup>VHNLPO

123456789012345678901234567890123456789012345678901234567890  
 1 2 3 4 5 6

Brachyteles\_arachnoides  
 Callithrix\_jacchus  
 Aotus\_nancymaae  
 Cebus\_capucinus\_imitator  
 Saimiri\_boliviensis  
 Macaca\_nemestrina  
 Chlorocebus\_sabaeus  
 Homo\_sapiens  
 Pongo\_abelii

NTTGFNWKGERVDGTVRIMGYVIAEQRIITPGPAYSSRETIYPNASLLIQNVTLNDTGFY  
 NTNGFNWKGERVDSTVRIIGYVIASQLTTPGPAYSGREVIYSNASLLIRNVTLNDTGFY  
 NTTGFNWKGESVDSTRRIIMGYVITTTQQTIPGPAHSGRETIYPNASLLIQNVTLNDTGFY  
 NINGFNWKQGSVDGTRRIIGYVIATQLTTPGPAYSSQETIYPNASLLIQNVTLNDTGFY  
 DTTGFNWHKGGSDSTRQITGYVIATQLTTRGPAHSGRETVYPNASLLIQNVTLNDTGFY  
 NLFGFNWKGERVDAKRLIVAVYIGTQQTTPGPAYSGREIVYSNASLLIQNV<sup>\*</sup>TQNDTGSY  
 NTLGYNWHKGERVDAKRLIVAVYIGTQQTTPGPAHSGRE<sup>\*</sup>IVYSNASLLIQNV<sup>\*</sup>TQNDTGSY  
 QLFGYSWYKGERVDGNRQIVGYAIGTQQTTPGPANSGRETIYPNASLLIQNV<sup>\*</sup>TQNDTGFY  
 NP<sup>\*</sup>LGYNWKGERMVDANHRIIGYV<sup>\*</sup>ISDQLTTPGPAYSSREKIYPNASLLIQNV<sup>\*</sup>TQNDTGFY

123456789012345678901234567890123456789012345678901234567890  
 61 7 8 9 100 1 2

|----- Ig-like C2-type 1 -----

Brachyteles\_arachnoides  
 Callithrix\_jacchus  
 Aotus\_nancymaae  
 Cebus\_capucinus\_imitator  
 Saimiri\_boliviensis  
 Macaca\_nemestrina  
 Chlorocebus\_sabaeus  
 Homo\_sapiens  
 Pongo\_abelii

TLQVIKTDLVNEEVTGQFRVYPELSKPYINSNNSNPVEDEDAVALTCETAQNTTYLWwV  
 TLQVIKADLVNEEATVQFHVYPELSKPYINSSNSNPVEDEDVVALTCETAQNTNYLWwV  
 RLQVIMADLVNEEATGQFRVYPELSKPYITSNNYNPVEDEDVVALTCETQNTTYLWwV  
 TLQVIKVDLVNEEATGQFRVYPELSKPYINSNNSNPVEDEDAVVALTCETAQNTTYLWwV  
 TLQVITANLVNTEATGQFRVYLELSKPYINSSNSNPVEDEDVVALTCETAQNTTNLWwV  
 TLQVIKGDLVNEEATGQFRVYPELPKPNITINNSNPVEDKDAVFTFCSEAQDTTYLWwV  
 TLQVIKQDLVNEEATGQFRVYPELPKPNITINNSNPVEDKDAVFTFCSEAQDTTYLWwV  
 TLQVIKSDLVNEEATGQFHVYPELPKPSISSNNSNPVEDKDAVFTFCPETQDTTYLWwI  
 TLQVIKSDLVNEEATGQFHVYPELPKPSISSNNSNPVEDNDAVALTCETPGTQDTTYLWwI

123456789012345678901234567890123456789012345678901234567890  
 121 3 4 5 6 7 8

|----- Ig-like C2-type 2 -----

Brachyteles\_arachnoides  
 Callithrix\_jacchus  
 Aotus\_nancymaae  
 Cebus\_capucinus\_imitator  
 Saimiri\_boliviensis  
 Macaca\_nemestrina  
 Chlorocebus\_sabaeus  
 Homo\_sapiens  
 Pongo\_abelii

NNQRLLVSPRLLLSNDNRTLTL<sup>\*</sup>LLSVTRNDTGPYECEIQNPVSVNRSDAVTLNVTYGPDTP  
 NNQSLPVSSRLLLSNDNRTLTL<sup>\*</sup>LLNVTRNDTGPYECEIQNPVSVNRSDPVTLNVTYGPDTP  
 NNQNLVSPRLLLSNDNRTLTL<sup>\*</sup>LLNVTRNDTGPYECEIQNPVSVNRSDPVTLNVTYGPDTP  
 NNQSVVSPRLLLSNDNRTLTL<sup>\*</sup>LLNVTRNDTGPYECEIQNPVSVNRSDPVTLNVTYGPDTP  
 NNQSLPVSPRLLVLSNDNRTLTL<sup>\*</sup>LLNITRNDTGPYECEIQNPVSVNRSDPVTLNITYGPDTP  
 NNQSLPVSSRLLQLSNGNKTLL<sup>\*</sup>LLSVLRNDTGPYECEIQNPVSVNRSDPVTLNVTYGPDTP  
 NGQSLPVSSRLLQLSNGNKTLL<sup>\*</sup>LLSVLRNDTGPYECEIQNPVSVNRSDPVTLNVTYGPDAP  
 NNQSLPVSPRLLQLSNGNRTLTL<sup>\*</sup>LLSVTRNDTGPYECEIQNPVSVNRSDPVTLNVTYGPDTP  
 NNQSL<sup>\*</sup>LISPRLQLSNGNRTLTL<sup>\*</sup>LLSVTRNDAGPYECEIQNPVSVNRSDPVTLNVTYGPDTP

123456789012345678901234567890123456789012345678901234567890  
 181 9 200 1 2 3 4

|----- Ig-like C2-type 2 -----

Brachyteles\_arachnoides  
 Callithrix\_jacchus  
 Aotus\_nancymaae  
 Cebus\_capucinus\_imitator  
 Saimiri\_boliviensis  
 Macaca\_nemestrina  
 Chlorocebus\_sabaeus  
 Homo\_sapiens  
 Pongo\_abelii

TISP<sup>\*</sup>SKTSYYPGANLSLFCDAASNPPAEYSW<sup>\*</sup>LINGTSRQ-NTQELFISNITVDHSGSYAC  
 TISP<sup>\*</sup>SKTSYYPGANLSLFCDAASNPPAEYSW<sup>\*</sup>LINGTSLQ-NTQELFISNITVDDSGSYAC  
 TISP<sup>\*</sup>SKTSYYPGANLSLFCDAASNPPAEYSW<sup>\*</sup>LINGTSHQKNTQELFISNITVDHSGSYAC  
 TISP<sup>\*</sup>SKTSYYPGANLSLFCDAASNPPAEYSW<sup>\*</sup>LINGT<sup>\*</sup>PCQINTQELFISNITVNRSGSYAC  
 TISP<sup>\*</sup>SDTYYPGANLSLSCSAASNPPAQYSW<sup>\*</sup>LINGTSRQ-NTQELFISNITVNRSGSYAC  
 TISP<sup>\*</sup>SDTYYPGANLSLSCSAASNPPAQYSW<sup>\*</sup>LINGTFQ-NTQELFIPNITVNRSGSYTC  
 TISP<sup>\*</sup>SDTYYPGANLSLSCSAASNPPAQYSW<sup>\*</sup>LINGTFQ-NTQELFIPNITVNRSGSYTC  
 TISP<sup>\*</sup>SDTYYPGANLSLSCYAASNPPAQYSW<sup>\*</sup>LINGTFQ-NTQELFIPNITVNRSGSYTC  
 TISP<sup>\*</sup>SDTYYPGANLSLSCYAASNPPAQYSW<sup>\*</sup>LINGTFQ-NTQELFIPNITVNRSGSYTC

123456789012345678901234567890123456789-01234567890123456789  
 241 5 6 7 8 9

-----|-----Ig-like C2-type 2-----

Brachyteles\_arachnoides VALNPVTGRNRITVKTIIVSKLNQ-VARPEVQATSTTVTEDKDSVNLTCSTNDTEISIRW

Callithrix\_jacchus VALNPVTGRNRITVKTIIVSKLNQ-VAQPEVQATSTTVTEDKDSVNLTCSTNDTEISIKW

Aotus\_nancymaae VALNPVTGRNRITVKTIIVSKLNQ-VARPEVQATSTTVTEDKDSVNLTCSTNDTEISIKW

Cebus\_capucinus\_imitator VALNPVTGRNRITVKTIIVSKLNQ-VARPEVQATSTTVTEDKDSVSLTCSTNDTEISIKW

Saimiri\_boliviensis VALNPVTGRNRITVKTIIVSKLNQ-VAQPEVQATSTTVTENKDSVNLTCSTNDTEISIKW

Macaca\_nemestrina HANNSVTGRNRITVKTIIVSELSPPVAQPQIKASKTTVTEKDSVNLTCSTNDTGISISW

Chlorocebus\_sabaeus HANNSVTGHNRTTVKTIIVSELSPPVAQPQIKASKTTVTEKDSVNLTCSTNDTGISISW

Homo\_sapiens HANNSVTGCNRTTVKTIIVTELSPP-VAKPQIKASKTTVTEGDKDSVNLTCSTNDTGISIRW

Pongo\_abelii HANNSVTGRNRITVKTIIVTELSPP-VVKPQIKASKTTVTEKDSVNLTCSTNDTGISISW

012345678901234567890123-45678901234567890123456789012345678

300 1 2 3 4 5

-----|-----

Brachyteles\_arachnoides FFNSQHISSSERIKLFQDNRTLRLIDPVKREDAGQYYCEVSNPISVNQSDPIRLTVKYT--

Callithrix\_jacchus FFNNQNILSSERIKLFQDNRTLRLIDPVKREDAGQYYCEVSNPISVNQSDPIRLTVKYT--

Aotus\_nancymaae FFNSQNILSSERIKLFQDNRTLRLIDPVKREDAGEYYCEVSNPISVNQSDPISLTVKYT--

Cebus\_capucinus\_imitator FFNNQNILSSERIKLFQDNRTLRLIDPVKREDAGQYYCEVSNPISVNQSDPIMLTVKYT--

Saimiri\_boliviensis FFNSQNILSSERIKLFQDNRTLRLIDPVKREDAGQYYCEVSNPISVNQSDPIMLIVKYT--

Macaca\_nemestrina FFKDQSLPSSERMKLSQDNATLSINPVKREDAGNYSCVEFNLSKNRSDPIMLIVNYNNP

Chlorocebus\_sabaeus FFEDQSLPSSERMKLSQDNATLSINPVKREDAGKYSCVEFNLSKNRSDPIMLIVNYNDP

Homo\_sapiens FFKNQSLPSSERMKLSQGNATLSINPVKREDAGTYWCEVFNLSKNQSDPIMLVNYN--

Pongo\_abelii FFENQSLPSSERMKLSQGNATLSINPVKREDAGKYWCEVFNLSKNQSDPIMLTVKYNYP

9012345678901234567890123456789012345678901234567890123456--

360 7 8 9 400 1

|---- Transmembrane ----|-- Cytoplasmic

Brachyteles\_arachnoides -EISGLSGGAIAGIVIGVLAGVALIAALMVYFLYVRKTGR

Callithrix\_jacchus -ESSGLSGGAIAGIVIGVLAGVALIAGLVVYFQHSRKTGR

Aotus\_nancymaae -ESSGLSGGAIAGIVIGVLAGVALIAALWVYFLHSRKTGR

Cebus\_capucinus\_imitator -ESSGLSRGAIAGIVIGVLAGMALIAALWVYFLHSRKTGR

Saimiri\_boliviensis -ESSGLSGGAIAGIVIGVLAGMALIAALWVYFLHSRKTGR

Macaca\_nemestrina AQENSLPAGAIAGIVIGVLAGVALVVAALACFLHFRKAGR

Chlorocebus\_sabaeus AQENSLTAGAIAGIVIGVLAGVALVVAALACFLHFRKTGR

Homo\_sapiens -QENGLSPGAIAGIVIGVVALVALIAVALACFLHFGKTGR

Pongo\_abelii SQENGLSAGAIAGIVIGVLAGVALIAVALACFLHFRKTGR

7890123456789012345678901234-56789012345

417 2 3 4 5



CLEC17A

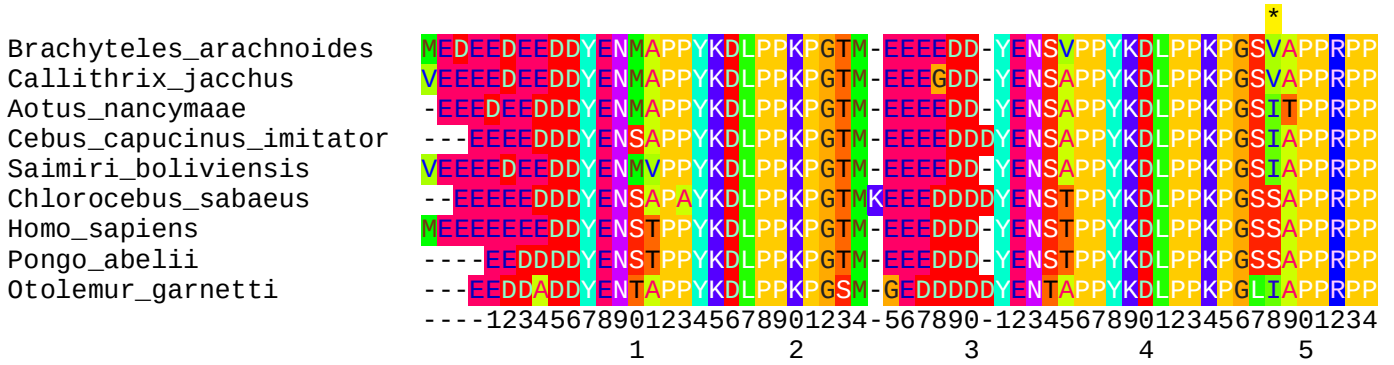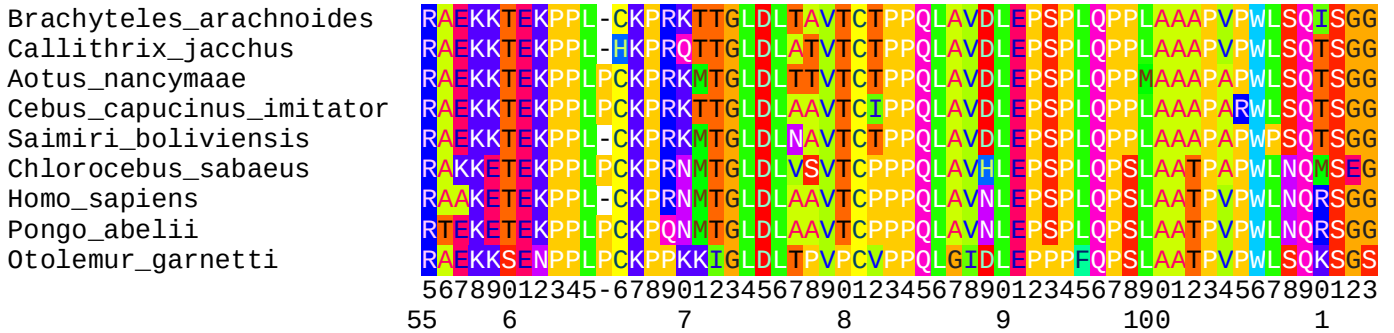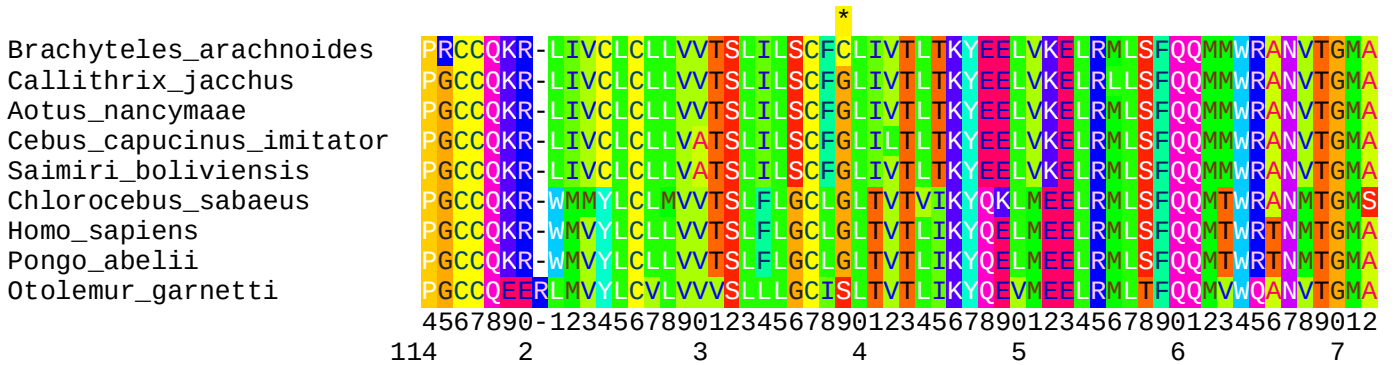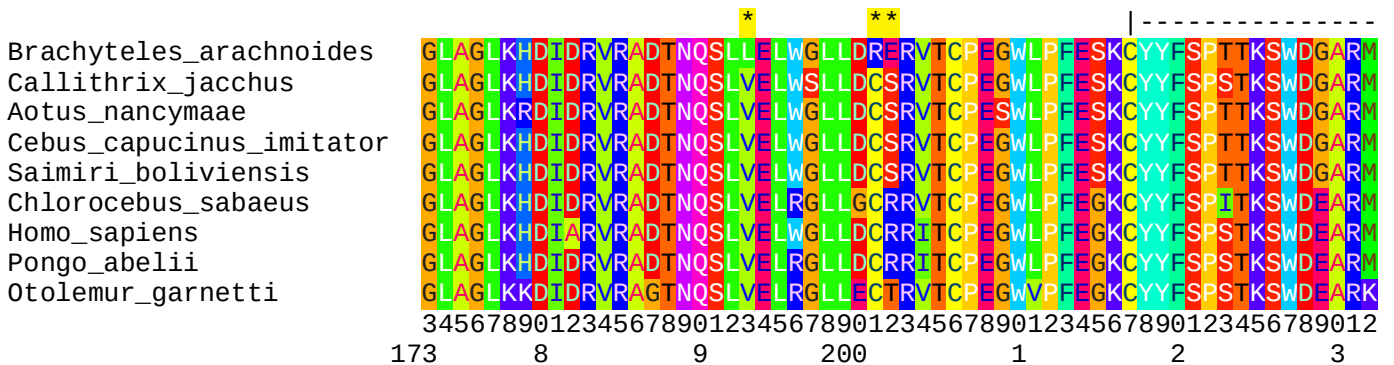

----- C-type lectin -----

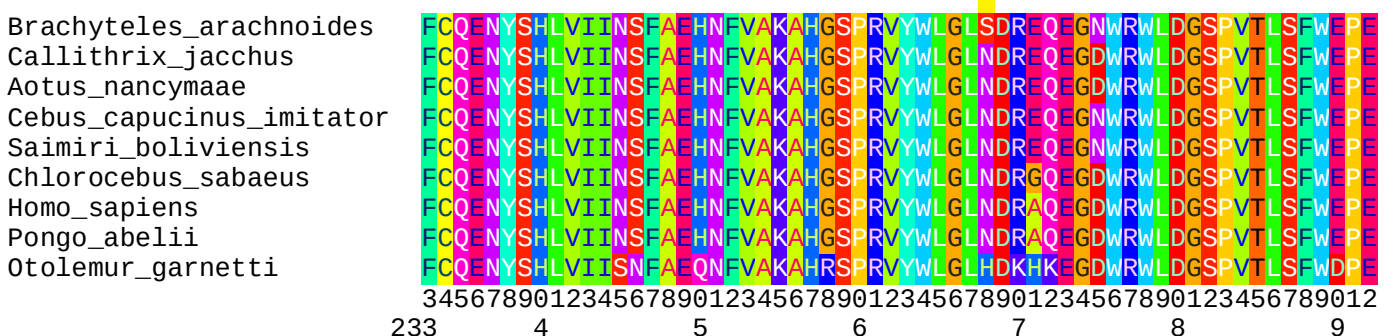

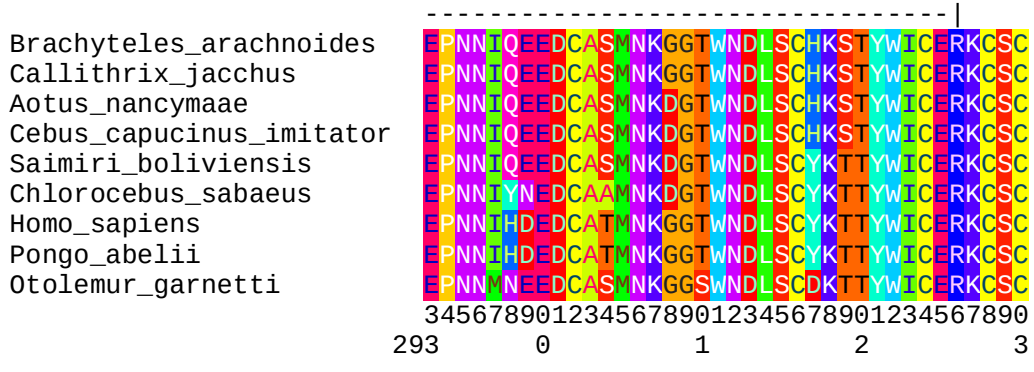

DDX52

Brachyteles\_arachnoides MDVHDLFRRLGAGAKFDVRRFSADAARFQIGKRKYDFDSSEVLQGLEFFGN-KNVPGV-C  
 Callithrix\_jacchus MDAHDLFRRLCAGAKFDVRRFSADAARFQIGKRKYDFNSLEMLQELDFFGN-KSVPGV-C  
 Aotus\_nancymaae MDAHDLFRRLGAGAKFDVRRFSADAARFQIGKRKYDLDSSEVLQGLDFFGNKCVPGV-C  
 Cebus\_capucinus\_imitator MDAHDLFRRLGAGAKFDVRRFSADAARFQIGKRKYDFDSSEVLQGLDFFGNKKSVPGV-C  
 Saimiri\_boliviensis MDAHDLFRRLGAGAKFDVRRFSADAARFQIGKRKYDFDSSEVLQGLDFFGN-KSVPGV-C  
 Macaca\_nemestrina MDVHDLFRRLGAGAKFDTRRFSAADAARFQIGKRKYDFDSSEVLQGLDFFGNKKSVPGV-C  
 Chlorocebus\_sabaeus MDVHDLFRRLGAGAKFDTRRFSAADAARFQIGKRKYDFDSSEVLQGLDFFGNKKSVPGV-C  
 Homo\_sapiens MDVHDLFRRLGAGAKFDTRRFSAADAARFQIGKRKYDFDSSEVLQGLDFFGN-KSVPGV-C  
 Pongo\_abelii MDVHDLFRRLGAGAKFDTRRFSAADAARFQIGKRKYDFDSSEVLQGLDFFGNKKSVPGV-S  
 Otolemur\_garnetti MDIQDLFRRLGTGAKFDVRRFSADAARFQIGKRKYDFDSSEVLQGLDVTGNKKSFSGE-C

123456789012345678901234567890123456789012345678901-234567-8  
 1 2 3 4 5

Brachyteles\_arachnoides GASQAHQKQPQNEDEVKKEESLTERKREQSKKKR--MTSEITSQDEGATTIQWISSVEAKIEDK  
 Callithrix\_jacchus GTSQAHQKQPQNEEVKKEESLTERKREQSKKKR--MTSEITSQDEVATTIQWISSVEAKIEDK  
 Aotus\_nancymaae GASQAHQKQPQSEEVKKEESLTERKREQSKKKRKMMTSESTSQDEVATTIQWISSVEAKIEDK  
 Cebus\_capucinus\_imitator GASQAHQKQPQNEEVKKEESLTERKREQSKKKRKTMTSEITSQDEVATTIQWISSVEAKIEDK  
 Saimiri\_boliviensis RASQAHQKQPQNEEVKKEESLTERKREQSKKKK--MTSEITSQDEVATTIQWISSVEAKIEDK  
 Macaca\_nemestrina GASQTHQKQPQNEEKKEESLTERKKEQSKKKRKMMTSEITSQEEGATTIQWISSVEAKIEDK  
 Chlorocebus\_sabaeus GASQTHQKQPQNEEKKEESLTERKREQSKRKRKMMTSEITSQEEGASIQWISSVEAKIEDK  
 Homo\_sapiens GASQTHQKQPQNGEKKEESLTERKREQSKKKR--MTSEIASQEEGATTIQWISSVEAKIEDK  
 Pongo\_abelii GASQTHQKQPQNGEKKEESLTERKREQSKKKRKTMTSEITSQEEGATTIQWISSVEAKIEDK  
 Otolemur\_garnetti GVSQTHQELQNEEKKEESLTERKREQKRQ-REKVTSEISSEGGTTIQ\*MSVDAKIEEK

90123456789012345678901234567-8--901234567890123-45678901234  
 60 7 8 9 100 1

Brachyteles\_arachnoides KVQRESKLTSGKLEHLRKEKINFLRNKHKIHVQGTDLDPDIATFQQLDQEQYKINSRLLQN  
 Callithrix\_jacchus KVQRENKLTSGKLERLRKEKINFLRNKHKIHVQGTDLDPDIATFQQLDQEQYKINSRLLQN  
 Aotus\_nancymaae KVQRENKLTSGKLEHLRKEKINFLRNKHKIHVQGTDLDPDIATFQQLDQEQYKINSRLLQN  
 Cebus\_capucinus\_imitator KVQRENKLTSGKLEHLRKEKINFLRNKHKIHVQGTDLDPDIATFQQLDQEQYKINSRLLQN  
 Saimiri\_boliviensis KVQRENKLTSGKLEHLRKEKINFLRNKHKIHVQGTDLDPDIATFQQLDQEQYKINSRLLQN  
 Macaca\_nemestrina KVPRESKLTSGKLEHLRKEKINFLRNKHKIHVQGTDLDPDIATFQQLDQEQYKINSRLLQN  
 Chlorocebus\_sabaeus KVPRESKLTSGKLEHLRKEKINFLRNKHKIHVQGTDLDPDIATFQQLDQEQYKINSRLLQN  
 Homo\_sapiens KVQRESKLTSGKLEHLRKEKINFLRNKHKIHVQGTDLDPDIATFQQLDQEQYKINSRLLQN  
 Pongo\_abelii KVERESKLTSGKLEHLRKEKINFLRNKHKIHVQGTDLDPDIATFQQLDQEQYKINSRLLQN  
 Otolemur\_garnetti KMEGENTLTSEKLEHLRKEKINFFRNKHKIHVQGTDLDPDITKFQQLD\*EQYKINSQLLN

567890123456789012345678901234567890123456789012-34567890123  
 115 2 3 4 5 6 7

Brachyteles\_arachnoides ILDAGFQMPPTPIQMQAIPVMLHGRELLASAPTGSCKTLAFSIPILMQLKQPANKGFRALI  
 Callithrix\_jacchus ILDAGFQMPPTPIQMQAIPVMLHGRELLASAPTGSCKTLAFGIPILMQLKQPANKGFRALI  
 Aotus\_nancymaae ILDAGFQMPPTPIQMQAIPVMLHGRELLASAPTGSCKTLAFSIPILMQLKQPANKGFRALI  
 Cebus\_capucinus\_imitator ILDAGFQMPPTPIQMQAIPVMLHGRELLASAPTGSCKTLAFSIPILMQLKQPANKGFRALI  
 Saimiri\_boliviensis ILDAGFQMPPTPIQMQAIPVMLHSRELLASAPTGSCKTLAFSIPILMQLKQPANKGFRALI  
 Macaca\_nemestrina ILDAGFQMPPTPIQMQAIPVMLHGRELLASAPTGSCKTLAFSIPILMQLKQPANKGFRALI  
 Chlorocebus\_sabaeus ILDAGFQMPPTPIQMQAIPVMLHGRELLASAPTGSCKTLAFSIPILMQLKQPANKGFRALI  
 Homo\_sapiens ILDAGFQMPPTPIQMQAIPVMLHGRELLASAPTGSCKTLAFSIPILMQLKQPANKGFRALI  
 Pongo\_abelii ILDAGFQIPTPIQMQAIPVMLHGRELLASAPTGSCKTLAFSIPILMQLKQPANKGFRALI  
 Otolemur\_garnetti IVDSGFQTPPTPIQM-AIPVMLHGRELLASTPTGSCKTLAFSIPILMQLKQPANKGFRALI

45678901234567-890123456789012345678901234567890123456789012  
 174 8 9 200 1 2 3

Brachyteles\_arachnoides ISPTRELASQIHRELIIKISEGTGFRIHMIHKAAVAAKKFGPKSSKKFDILVTTNRLIYL  
 Callithrix\_jacchus ISPTRELASQIHRELVKISEGTGFRIHMIHKAAVAAKKFGPKSSKKFDILVTTNRLIYL  
 Aotus\_nancymaae ISPTRELASQIHRELIIKISEGTGFRIHMIHKAAVAAKKFGPKSSKKFDILVTTNRLIYL  
 Cebus\_capucinus\_imitator ISPTRELASQIHRELIIKISDGTGFRIHMIHKAAVAAKKFGPKSSKKFDILVTTNRLIYL  
 Saimiri\_boliviensis ISPTRELASQIHRELIIKISEGTGFRIHMIHKAAVAAKKFGPKSSKKFDILVTTNRLIYL  
 Macaca\_nemestrina ISPTRELASQIHRELIIKISEGTGFRIHMIHKAAVAAKKFGPKSSKKFDILVTTNRLIYL  
 Chlorocebus\_sabaeus ISPTRELASQIHRELIIKISEGTGFRIHMIHKAAVAAKKFGPKSSKKFDILVTTNRLIYL  
 Homo\_sapiens ISPTRELASQIHRELIIKISEGTGFRIHMIHKAAVAAKKFGPKSSKKFDILVTTNRLIYL  
 Pongo\_abelii ISPTRELASQIHRELIIKISEGTGFRIHMIHKAAVAAKKFGPKSSKKFDILVTTNRLIYL  
 Otolemur\_garnetti RSPT\*ELASQFHRELIIKISEGAGFMIIHMIYKVAVAAKKSGPKSSKKFDILVTTNQLIYL

3456-7890123456789012345678901234567890123456789012345678901  
 233 4 5 6 7 8 9

|DEAD| box

----- Helicase ATP-binding -----

Brachyteles\_arachnoides  
 Callithrix\_jacchus  
 Aotus\_nancymaae  
 Cebus\_capucinus\_imitator  
 Saimiri\_boliviensis  
 Macaca\_nemestrina  
 Chlorocebus\_sabaeus  
 Homo\_sapiens  
 Pongo\_abelii  
 Otolemur\_garnetti

2345678901234567890123456789012345678901234567890123456789012345678901

292 300 1 2 3 4 5

----- Helicase C-terminal -----

Brachyteles\_arachnoides  
 Callithrix\_jacchus  
 Aotus\_nancymaae  
 Cebus\_capucinus\_imitator  
 Saimiri\_boliviensis  
 Macaca\_nemestrina  
 Chlorocebus\_sabaeus  
 Homo\_sapiens  
 Pongo\_abelii  
 Otolemur\_garnetti

2345678901234567890123456789012345678901234567890123456789012345678901

352 6 7 8 9 400 1

----- Helicase C-terminal -----

Brachyteles\_arachnoides  
 Callithrix\_jacchus  
 Aotus\_nancymaae  
 Cebus\_capucinus\_imitator  
 Saimiri\_boliviensis  
 Macaca\_nemestrina  
 Chlorocebus\_sabaeus  
 Homo\_sapiens  
 Pongo\_abelii  
 Otolemur\_garnetti

2345678901234567890123456789012345678901234567890123456789012345678901

412 2 3 4 5 6 7

----- Helicase C-terminal -----

Brachyteles\_arachnoides  
 Callithrix\_jacchus  
 Aotus\_nancymaae  
 Cebus\_capucinus\_imitator  
 Saimiri\_boliviensis  
 Macaca\_nemestrina  
 Chlorocebus\_sabaeus  
 Homo\_sapiens  
 Pongo\_abelii  
 Otolemur\_garnetti

2345678901234567890123456789012345678901234567890123456789012345678901

472 8 9 500 1 2 3

----- Lys-rich -----

Brachyteles\_arachnoides  
 Callithrix\_jacchus  
 Aotus\_nancymaae  
 Cebus\_capucinus\_imitator  
 Saimiri\_boliviensis  
 Macaca\_nemestrina  
 Chlorocebus\_sabaeus  
 Homo\_sapiens  
 Pongo\_abelii  
 Otolemur\_garnetti

234567890123-4567890123456789012345678901-2345678901234567- -

532 4 5 6 7 8

DNAJC4

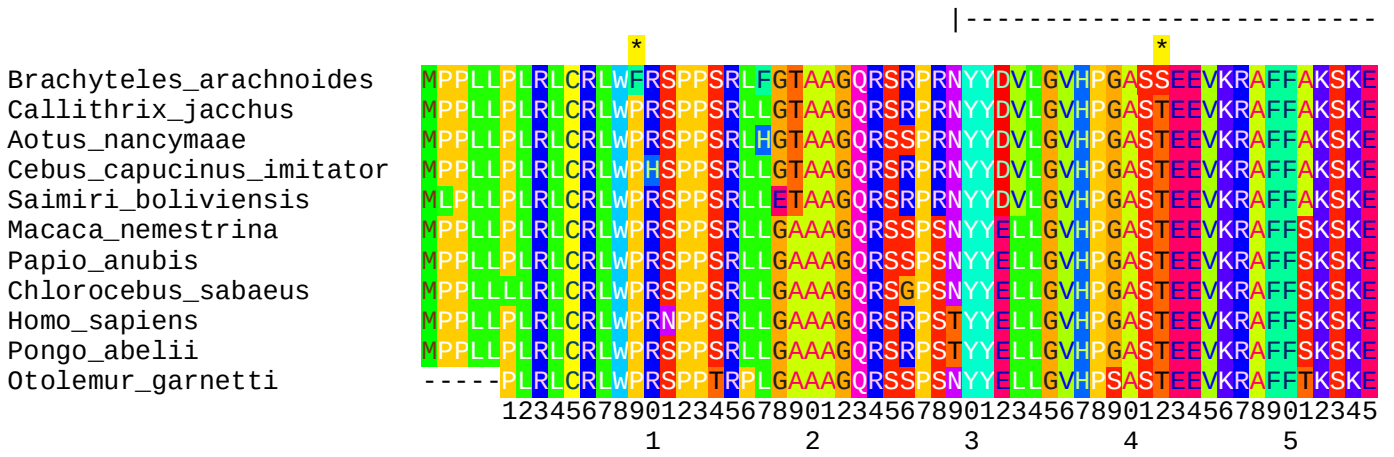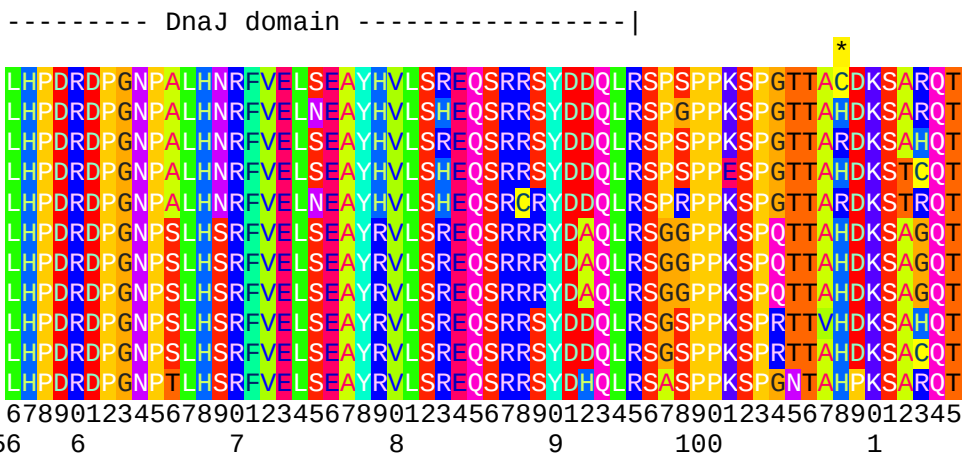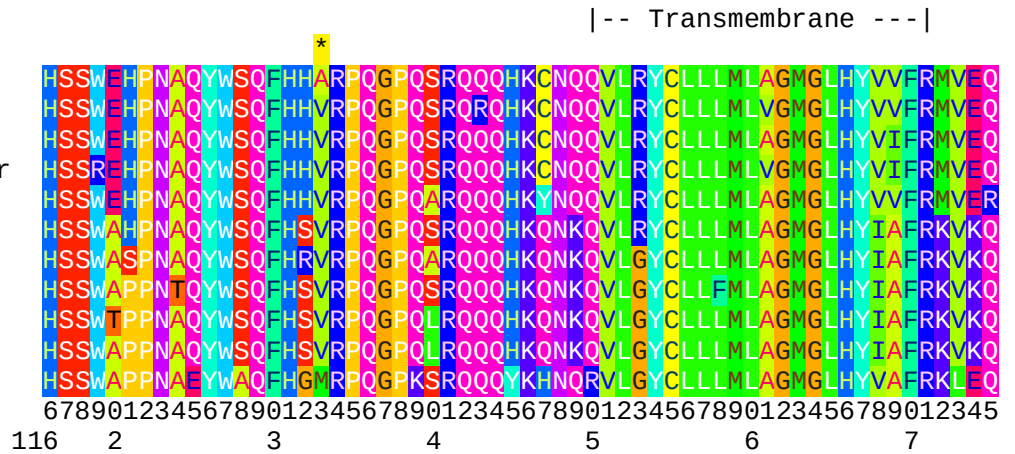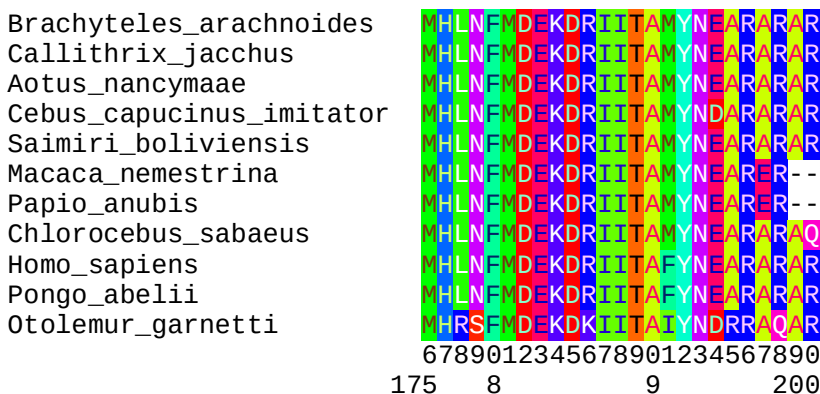

ECM1

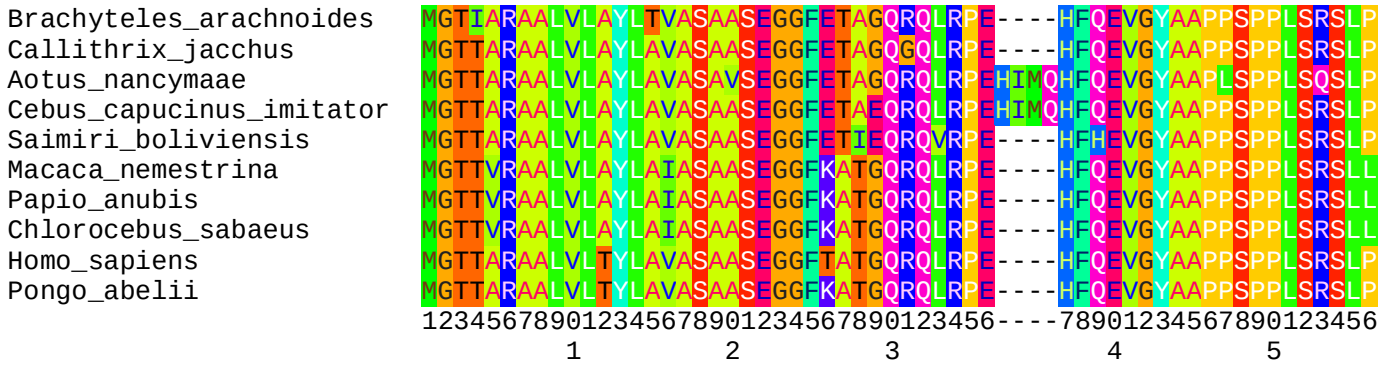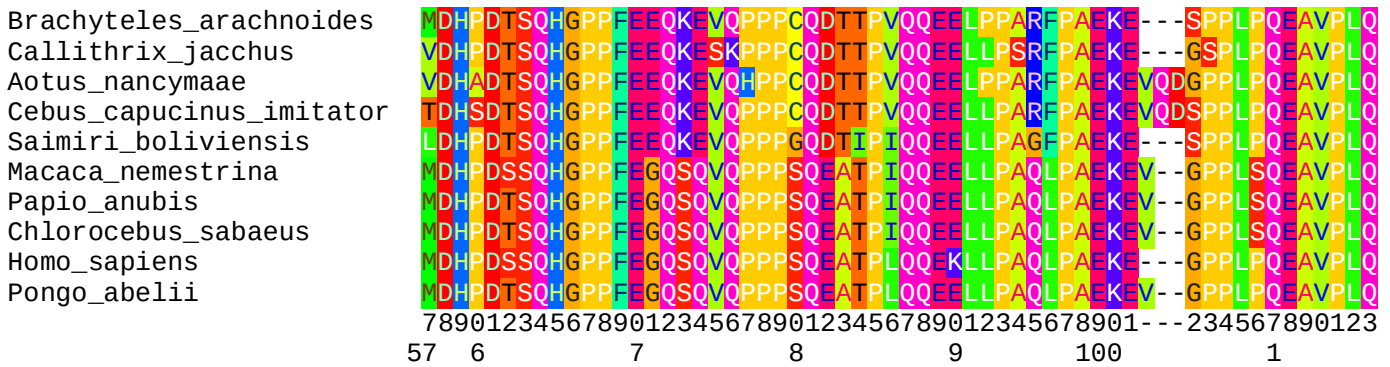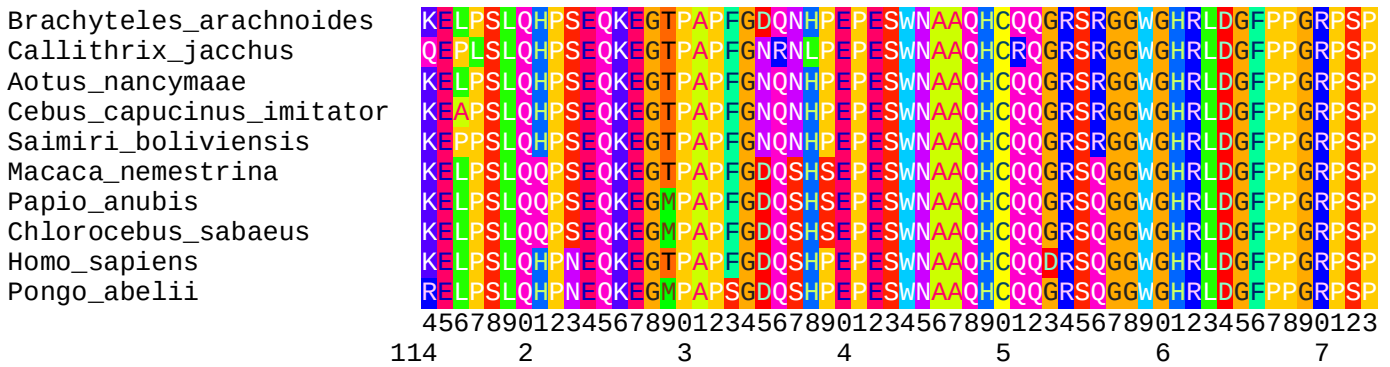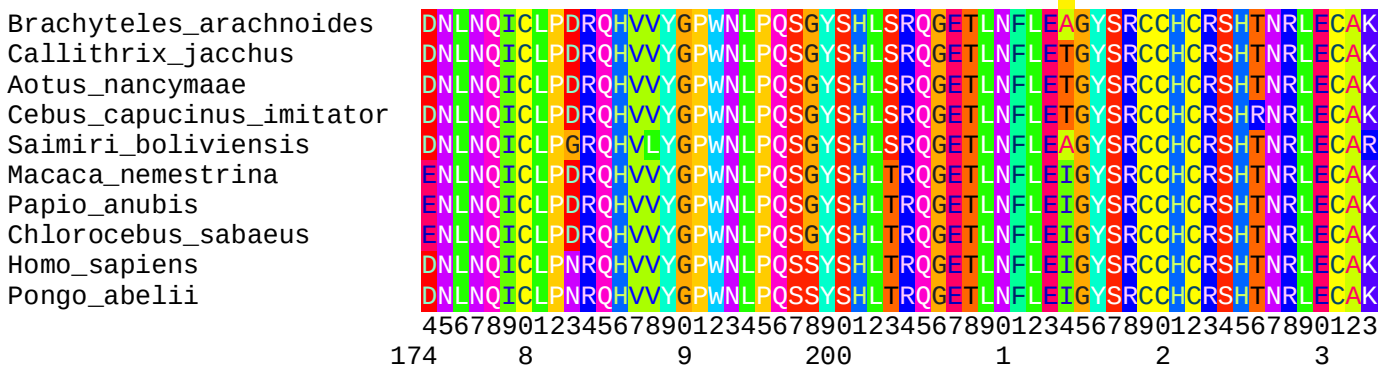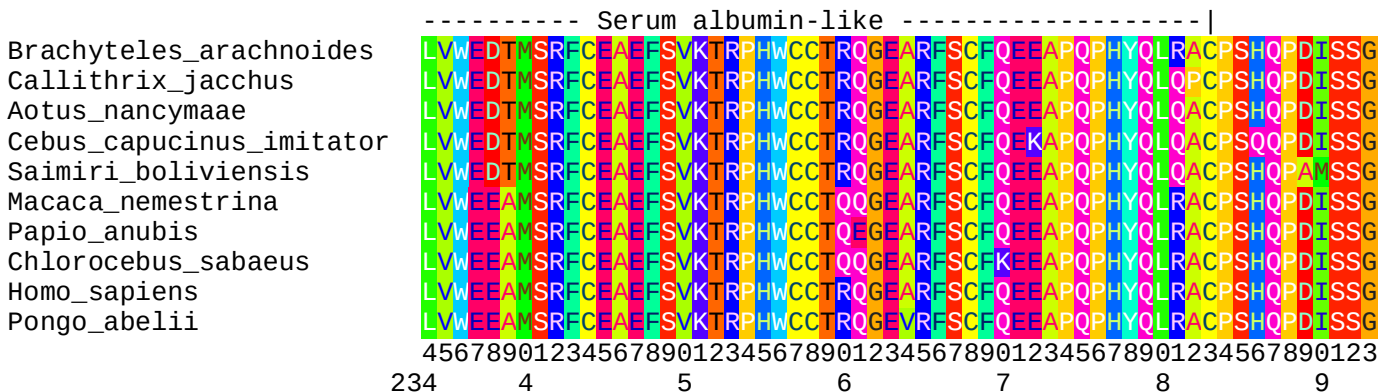



EMCN

|Signal pep|

|                          |                                                                         |
|--------------------------|-------------------------------------------------------------------------|
| Brachyteles_arachnoides  | LFL LPSLCSSDN - TGVINA - NTSPIVS TTIKTSV R TPSTESSQN PVITPA IGTTP NGTTN |
| Callithrix_jacchus       | MFFHRTLQSSYF - SDVINA - NTSPIVS TTIKTSV L TPSTESLQNPVITPT IGTTP KGTT S  |
| Aotus_nancymaae          | LFL LPSLCSSD VNTDVINA STSLPIVS TTIKTSV L TPSTESLWNPVITPT MGTTP KGTT N   |
| Cebus_capucinus_imitator | LFL LPSLCSSD VDTGLINANI SS SV TTIKTS A Q TPSTESLQNPVITPT IGT I PTGTT N  |
| Saimiri_boliviensis      | LFL LPSLCSSDN - TDVINA - NTSPIVS TAIKTSAL PSSTESLSSPVITPI IGTTP KGTT N  |
| Macaca_nemestrina        | LFL LPSICSSEN STGVINAAT PSSVVV T - TETSV TTPNTGSSQKNVITTTT NETT PKGTIT  |
| Chlorocebus_sabaeus      | LFL LPSICSSEN RTGVINVTLL SSVVV TTTKT SVATPNTGSSQKNVTTTTT ETT PKGTIT     |
| Homo_sapiens             | LFL LPSICSSNS - TGVLEA - ANNSLVV TTTKPSITTPN TESLQKNVVTPTTGTT PKGTIT    |
| Pongo_abelii             | LFL LPSICSSNS - TGVLEA - ANNSLVV TTIKTSITTPN TESLQKNVITPTTGTT PKGTIT    |
| Otolemur_garnetti        | ----- TSPKGTTN                                                          |

12345678

|                          |                                                                       |
|--------------------------|-----------------------------------------------------------------------|
| Brachyteles_arachnoides  | SELLTKSLLSTVASLTT SKEE - LRITTTDGRKNESIISNVAVTNLALPNAVSTLQSSQOK       |
| Callithrix_jacchus       | SELLKKSLLSTIASLTT SKEE - LRITSTDGK NESIISNVAVTNLALPNAVSTSPNSQHK       |
| Aotus_nancymaae          | SEL-----STVASLTT SKEE - LGITTTDGRQNESIISNAAVTYLALPTAVSTLQSSQHK        |
| Cebus_capucinus_imitator | SELLKKS L F - TVASLTT SKEE - LRITTTDGRENESIISNVAVTNLALPNAVSTSQSSQHK   |
| Saimiri_boliviensis      | SELLKNPLLSTVASLTT SKEE - LIITTTD GKKNESIISNVAVTNLALPNAVSTLQSYQHK      |
| Macaca_nemestrina        | SELPKTSLTTT V TLLITSKDEGLRV TTPDVRENKSIISNVTVT SVTPPNAV SALQSSKPK     |
| Chlorocebus_sabaeus      | SELLKTS LTTT V TLLTTSKDEGLRV TTPDV TENKSIISNVTVT SVTPPNAVSTLQSSKPK    |
| Homo_sapiens             | NELLKMSLMSTATFL - TSKDEGLKATTTDVRKND SIISNVTVT SVTL PNAVSTLQSSKPK     |
| Pongo_abelii             | NELLKMSLM SAVTL - - TSKDEGLKVTTT D VRKNEIIVSNVTVT I VTL PNAVSTLQSSKPK |
| Otolemur_garnetti        | SESLKTTLLVSTVSSLSTVKGQELRITTTNGTTKNESIFTTVT EANIPLSKVVSTSQSFQNK       |

901-----2345--67890-123456789012345678901234567890123456789012345678

10 2 3 4 5

|                          |                                                                     |
|--------------------------|---------------------------------------------------------------------|
| Brachyteles_arachnoides  | TETQSTIKTTEIPGSTLQPDASPSKTGTLHSM PVTIPESTLPSQ --GTENGKNASAVATS      |
| Callithrix_jacchus       | SNVKLV LASEYFPASTLQPDASPSKTGTLHSM PVTIPESTLPSQ --GTENGKNASAVATS     |
| Aotus_nancymaae          | TETQSTIKTME LSGNTLQPDVSPSKTGT LHSTPVTIPESTLPSQ --GTENGKNASAVATS     |
| Cebus_capucinus_imitator | TETQSTIKIMKIPGSTLQPDASPSKTGTS HSM PATIPESTLPSQ --GTENGKNSSASAAS     |
| Saimiri_boliviensis      | TETQSTIKIMEISGSTRQPDASSSKTGT LHSM PVTIPESTLPSQ --GTENGKNASASAAS     |
| Macaca_nemestrina        | TETQSSI KTTKIPGSILQPDASPSKAGTVSSIPVTIPESTLPSQ --GTENGKNASTSATS      |
| Chlorocebus_sabaeus      | TETQSSI KTTKIPGSILQPDASPSKAGTVSSIPVTIPESTLPSQ --GTENGKNASTSATS      |
| Homo_sapiens             | TETQSSI KTTTEIPGSVLQPDASPSKTGTLTSIPVTIPESTLPSQ --GTENGKNASTSATS     |
| Pongo_abelii             | TETQSSI KTTTEIPGSILQPDASPSK E TGT LSSIPVTIPESTLPSQ --GTENGKNASTSATS |
| Otolemur_garnetti        | TDNQSLTKTTEIPGKTPQPDISHSKSTLPSVSTTVTENLLPSQ --GTEDGKNASSPTTS        |

901234567890123456789012345678901234567890123456789012--34567890123456

60 7 8 9 100 1

|--- Transmembrane ---|

|                          |                                                                  |
|--------------------------|------------------------------------------------------------------|
| Brachyteles_arachnoides  | PSYSSII LPVVI ALIVITLSVFVLVGLYRVCWKSDPG-----QPQSDKESVKLLTVK      |
| Callithrix_jacchus       | PSYSSII LPVVI ALIVITLSVFVLVGLYRVCWKSDPG-----RPQSDKESVKLLTVK      |
| Aotus_nancymaae          | PSYSSII LPVVI ALIVITLSVFVLVGLYRVCWKSDPGT - AENGNDQPQSDKESVKLLTVK |
| Cebus_capucinus_imitator | PSYSSII LPVVI ALIVITLSVFVLVGLYRVCWKSDPGT - AENGNDQPQSDKESVKLLTVK |
| Saimiri_boliviensis      | PSYSSII LPVVI ALIVITLSVFVLVGLYRVCWKSDPG-----QPQSDKESVKLLTVK      |
| Macaca_nemestrina        | RSYSSII LPVVI ALIVITLSVFVLVGLYRVCWKADPGT - PENGNDQPQSDKESVKLLTVK |
| Chlorocebus_sabaeus      | RSYSSII LPVVI ALIVITLSVFVLVGLYRVCWKADPGT - PENGNDQPQSDKESVKLLTVK |
| Homo_sapiens             | RSYSSII LPVVI ALIVITLSVFVLVGLYRVCWKADPG-----QPQSDKESVKLLTVK      |
| Pongo_abelii             | RSYSSII LPVVI ALIVITLSVFVLVGLYRVCWKADPGT - PENGNDQPQSDKESVKLLTVK |
| Otolemur_garnetti        | PSYSSII LPVVI ALIVITLSVFVVVGLYRVCWKTDPGTTQENGNDQPQSDKESVKLLTVK   |

7890123456789012345678901234567890123-----456789012345678

117 2 3 4 5 6

|                          |                      |
|--------------------------|----------------------|
| Brachyteles_arachnoides  | TISHES - EHS AQGKTKN |
| Callithrix_jacchus       | TISHES - ELLLYGRRKN  |
| Aotus_nancymaae          | TISHESGEHS AQGKSKN   |
| Cebus_capucinus_imitator | TISHESGEHS AQGKTKN   |
| Saimiri_boliviensis      | TISHES - EHS AQGKTKN |
| Macaca_nemestrina        | TISHESGEHS AQGKTKN   |
| Chlorocebus_sabaeus      | TLSHESGEHS AQGKTKN   |
| Homo_sapiens             | TISHES - EHS AQGKTKN |
| Pongo_abelii             | TISHESGEHS AQGKTKN   |
| Otolemur_garnetti        | TISHESGEHS AQGKSKN   |

901234-5678901234

170 8



FLVCR2

|----- tandem repeats -----\*

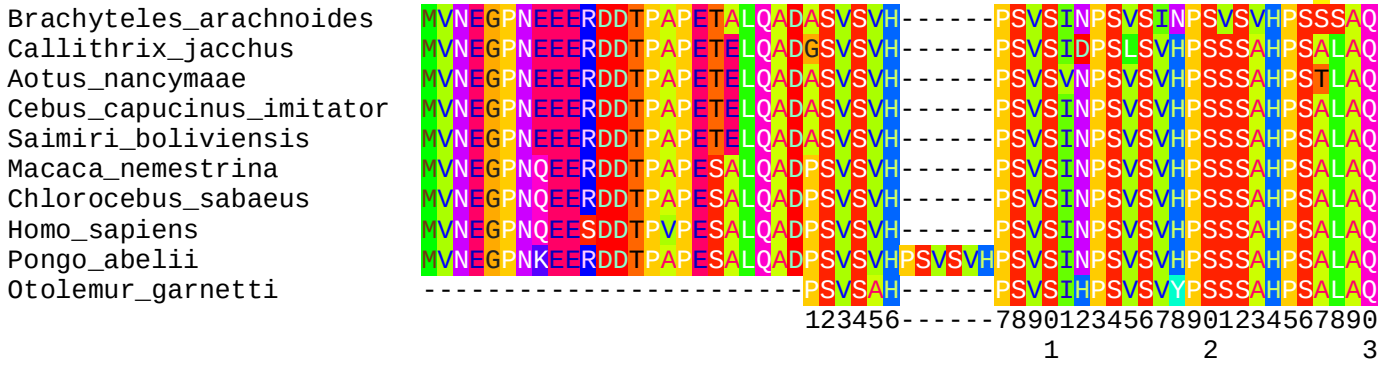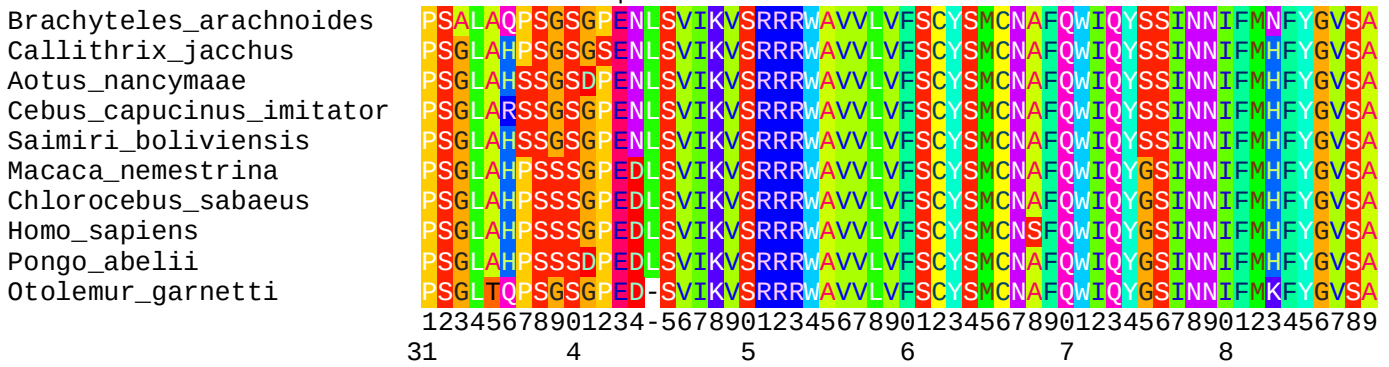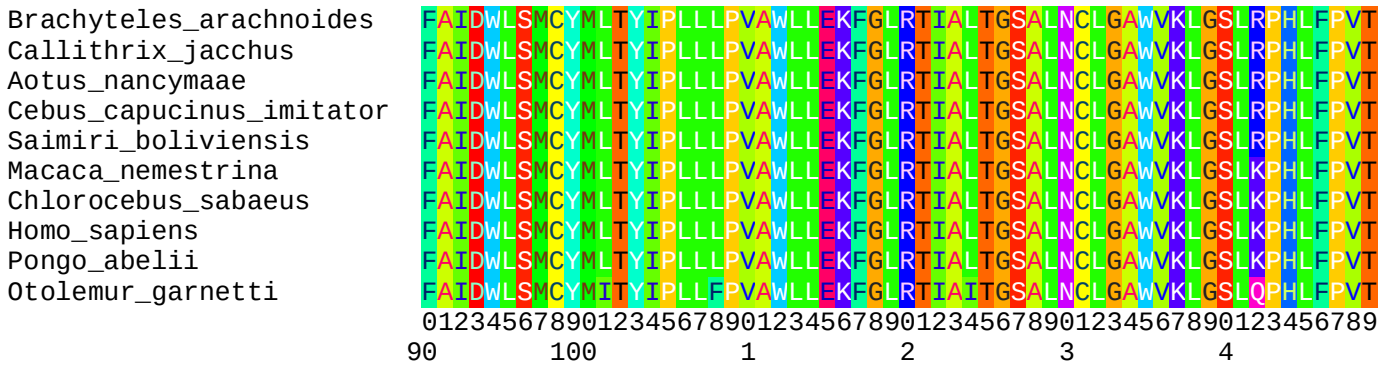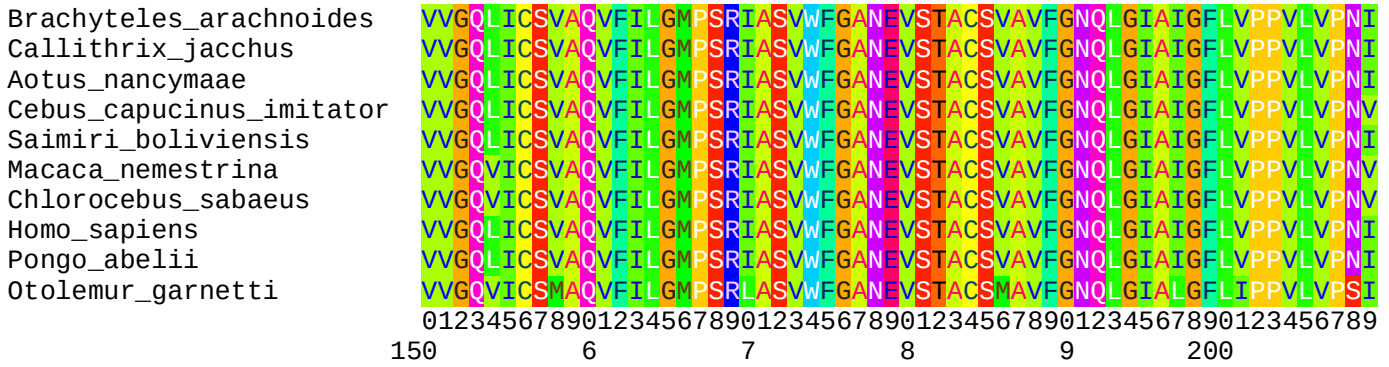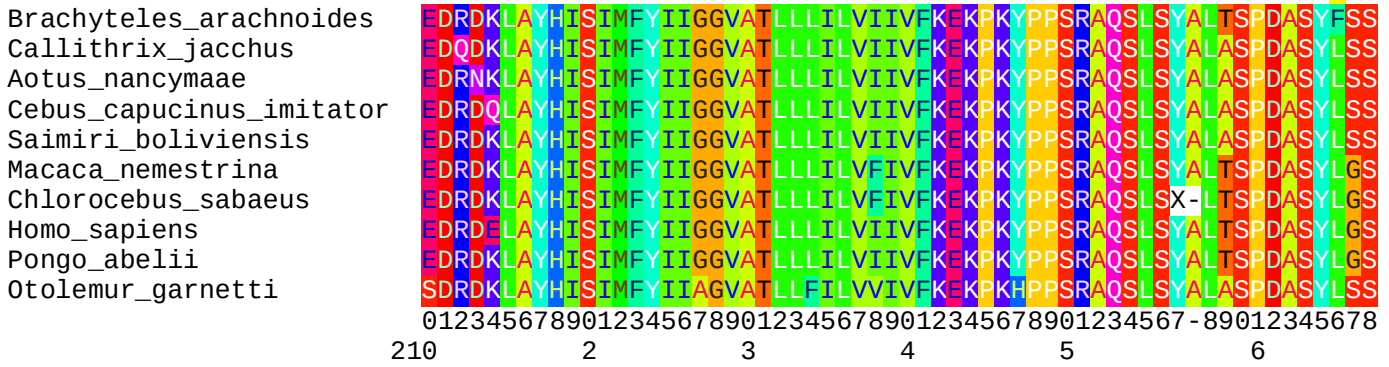

Brachyteles\_arachnoides  
 Callithrix\_jacchus  
 Aotus\_nancymaae  
 Cebus\_capucinus\_imitator  
 Saimiri\_boliviensis  
 Macaca\_nemestrina  
 Chlorocebus\_sabaeus  
 Homo\_sapiens  
 Pongo\_abelii  
 Otolemur\_garnetti

```

ITRLFKNLNFVLLVITYGLNAGAFYALSTLLNRMVIRHYPGEEVNAGRIGLTIVIAAGMLG
IVRLFKNLNFVLLVITYGLNAGAFYALSTLLNRMVIRHYPGEEVNAGRIGLTIVIAAGMLG
IIRLFKNLNFVLLVITYGLNAGAFYALSTLLNRMVIRHYPGEEVNAGRIGLTIVIAAGMLG
ISRLFKNLNFVLLVITYGLNAGAFYALSTLLNRMVIRHYPGEEVNAGRIGLTIVIAAGMLG
ISRLFKNLNFVLLVITYGLNAGAFYALSTLLNRMVIRHYPGEEVNAGRIGLTIVIAAGMLG
IAQLFKNLNFVLLVITYGLNAGAFYALSTLLNRMVIWHYPGEEVNAGRIGLTIVIAAGMLG
IAQLFKNLNFVLLVITYGLNAGAFYALSTLLNRMVIWHYPGEEVNAGRIGLTIVIAAGMLG
IARLFKNLNFVLLVITYGLNAGAFYALSTLLNRMVIWHYPGEEVNAGRIGLTIVIAAGMLG
IARLFKNLNFVLLVITYGLNAGAFYALSTLLNRMVIWHYPGEEVNAGRIGLTIVIAAGMLG
IVRLFKNLNFVLLIITYGLNAGSFYSLSTLLNRMVIRSHYPDDEEVNAGRIGLTIIIIAGMLG
901234567890123456789012345678901234567890123456789012345678
270      8      9      300      1      2
  
```

Brachyteles\_arachnoides  
 Callithrix\_jacchus  
 Aotus\_nancymaae  
 Cebus\_capucinus\_imitator  
 Saimiri\_boliviensis  
 Macaca\_nemestrina  
 Chlorocebus\_sabaeus  
 Homo\_sapiens  
 Pongo\_abelii  
 Otolemur\_garnetti

```

AVLSGIWLDRSKTYKETTLLVYYIMTLVGMVVYTFTLNLGHLWVVFITAGTMGFFMTGYLP
AVLSGIWLDRSKTYKETTLLVYYIMTLVGMVVYTFTLNLGHLWVVFITAGTMGFFMTGYLP
AVLSGIWLDRSKTYKETTLLVYYIMTLVGMVVYTFTLNLGHLWVVFITAGSMGFFMTGYLP
AVLSGIWLDRSKTYKETTLLVYYIMTLVGMVVYTFTLNLGHLWVVFITAGTMGFFMTGYLP
AVLSGIWLDRSKTYKETTLLVYYIMTLVGMVVYTFTLNLGHLWVVFITAGTMGFFMTGYLP
AVISGIWLDRSKTYKETTLLVYYIMTLVGMVVYTFTLNLGHLWVVFITAGTMGFFMTGYLP
AVISGIWLDRSKTYKETTLLVYYIMTLVGMVVYTFTLNLGHLWVVFITAGTMGFFMTGYLP
AVISGIWLDRSKTYKETTLLVYYIMTLVGMVVYTFTLNLGHLWVVFITAGTMGFFMTGYLP
AVISGIWLDRSKTYKETTLLVYYIMTLVGMVVYTFTLNLGHLWVVFITAGTMGFFMTGYLP
AVISGIWLDRSKTYKETTLLVYYIMTLVGMVVYTFTLNLGHLWVVFITAGTMGFFMTGYLP
901234567890123456789012345678901234567890123456789012345678
330      4      5      6      7      8
  
```

Brachyteles\_arachnoides  
 Callithrix\_jacchus  
 Aotus\_nancymaae  
 Cebus\_capucinus\_imitator  
 Saimiri\_boliviensis  
 Macaca\_nemestrina  
 Chlorocebus\_sabaeus  
 Homo\_sapiens  
 Pongo\_abelii  
 Otolemur\_garnetti

```

LGFEFAVELTYPESSEGISSGLLNISAQV-GLIF-----ISAQV-GLIFF-IS
LGFEFAVELTYPESSEGISSGLLNISAQV-GIIF-----ISAQV-GIIFF-IS
LGFEFAVELTYPESSEGISSGLLNISAQVFGIIFX-----ISAQVFGIIFF-IS
LGFEFAVELTYPESSEGISSGLLNISAQVFGIIF-----ISAQVFGIIFF-IS
LGFEFAVELTYPESSEGISSGLLNISAQV-GIIF-----ISAQV-GIIFF-IS
LGFEFAVELTYPESSEGISSGLLNISAQVFGIIF-----FISAQVFGIIFFIS
LGFEFAVELTYPESSEGISSGLLNISAQVFGIIF-----SAQVFGIIFF-S
LGFEFAVELTYPESSEGISSGLLNISAQV-GIIF-----ISAQV-GIIFF-IS
LGFEFAVELTYPESSEGISSGLLNISAQVFGIIFQVFGIIFSSGLLNISAQVFGIIF-
LGFEFAVELTYPESSEGMSSGLLNISAQVFGIIF-----
90123456789012345678901234567890123456789012345678901234567890
390      400      1      420
  
```

Brachyteles\_arachnoides  
 Callithrix\_jacchus  
 Aotus\_nancymaae  
 Cebus\_capucinus\_imitator  
 Saimiri\_boliviensis  
 Macaca\_nemestrina  
 Chlorocebus\_sabaeus  
 Homo\_sapiens  
 Pongo\_abelii  
 Otolemur\_garnetti

```

AQV-GLIF-----
AQV-GIIF-----
AQVFGII-----
AQVFGII-----
AQV-GIIF-----
AQVFGIIF-----
AQVFGIIF-----
AQV-GIIF-----
-QVFGIIFSSGLLNISAQVFGIIF-
-----
  
```

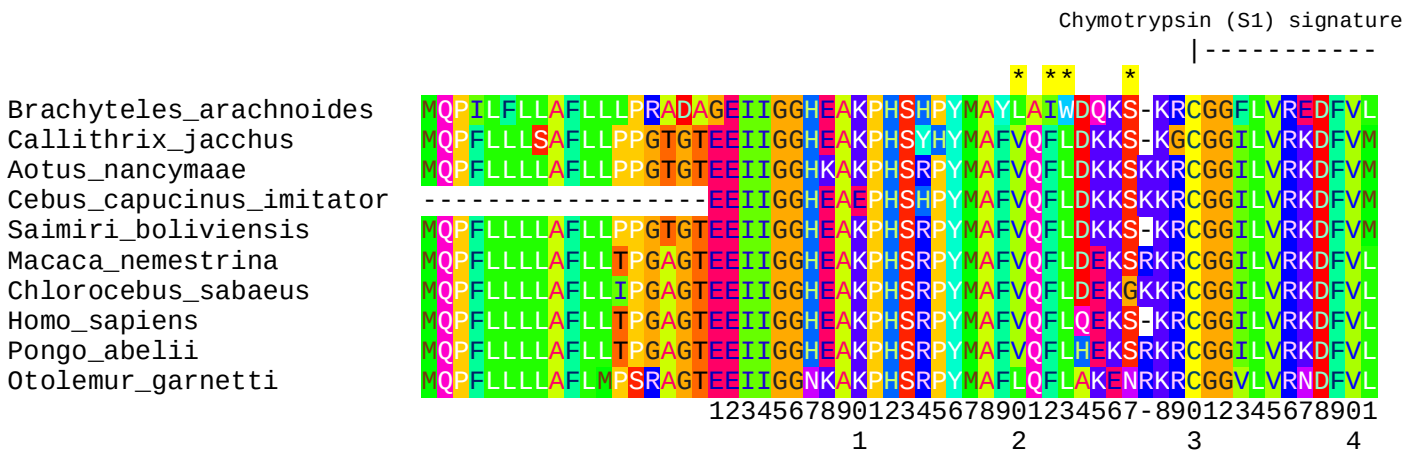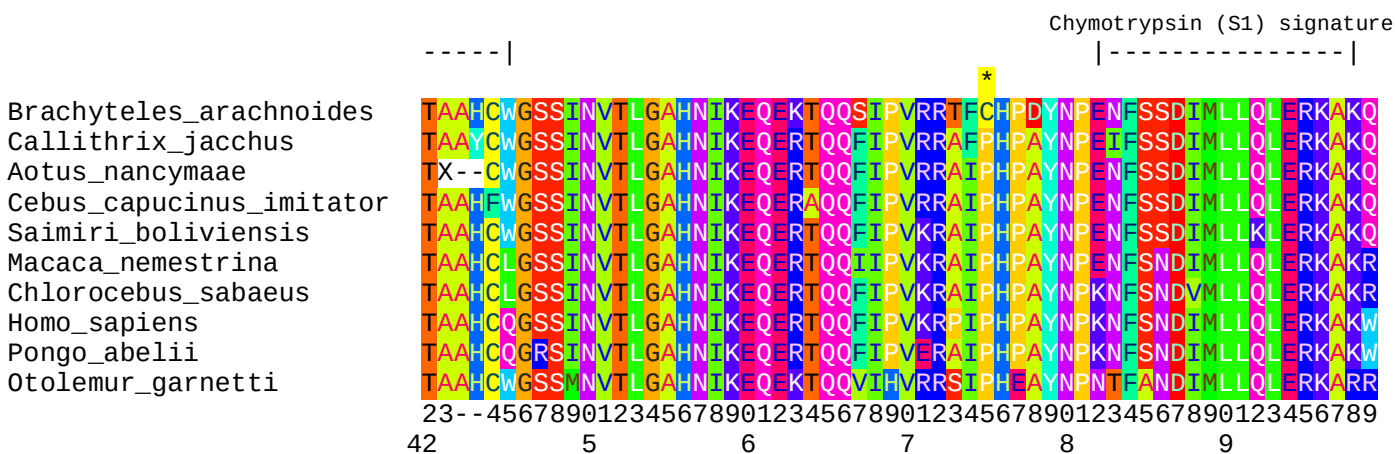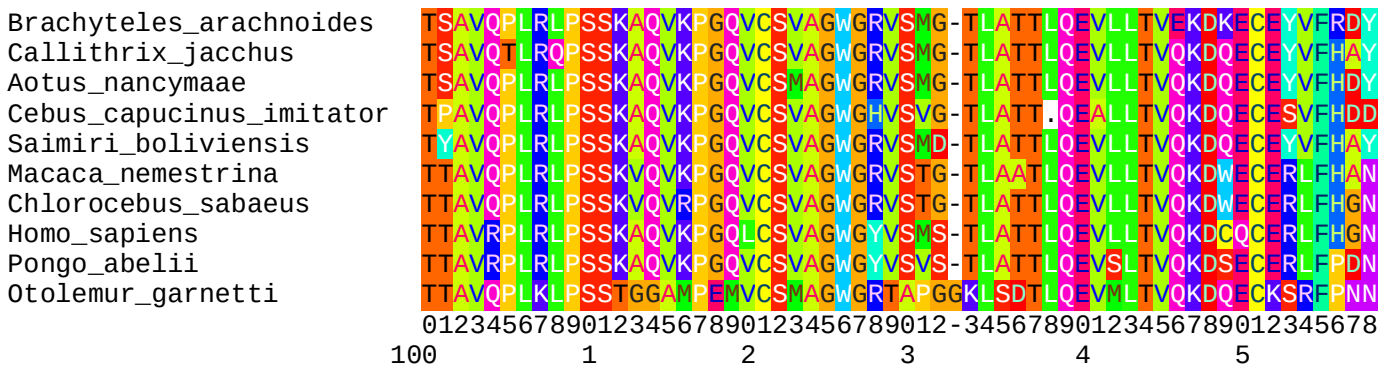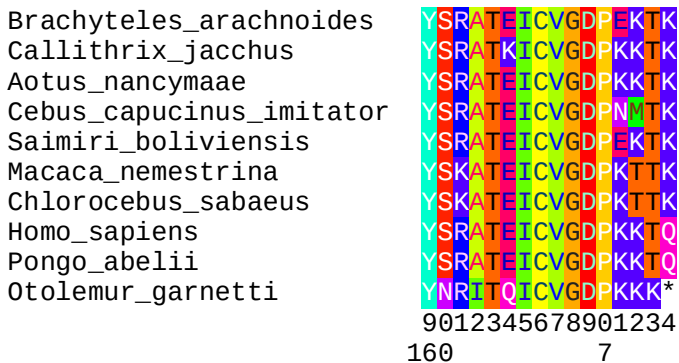

HLA-DRB1

| Signal peptide |

|                          |          |          |        |        |        |       |       |      |       |      |      |      |
|--------------------------|----------|----------|--------|--------|--------|-------|-------|------|-------|------|------|------|
| Brachyteles_arachnoides  | MAALTVTL | MVLSSPL  | LALAGD | TRPRFL | EHVKF  | ECYLF | NGTE  | --R  | YLVRA | IYNQ | EEYV | RFDS |
| Callithrix_jacchus       | VAALTVTL | MVLSSPL  | LALAGD | TRPRYL | EQRKAE | CHHFN | NGTE  | --R  | LLERY | FYNQ | EEFV | RFDS |
| Aotus_nancymaae          | -AALTVTL | MVLSSPL  | LALVGD | TRPRFL | ELVKHE | CHFFN | NGTER | VRYL | DRYI  | HNQ  | EEV  | RFDS |
| Cebus_capucinus_imitator | MAALTVTL | MVLSSPL  | LALAGD | TRPRFL | EQAKSE | CHFFN | NGTER | VRYL | QRYF  | YNQ  | EEYV | RFDS |
| Saimiri_boliviensis      | MAALTVTL | MVMSSPL  | LALAGD | TRPRFL | KQVKHE | CHHFK | GME   | --R  | FLFR  | HIYN | QEEY | VFDS |
| Macaca_nemestrina        | MAALTMT  | LMVLSSPL | LALAGD | TRARFL | EQVKHE | CHFFN | NGTER | VRFL | DRYF  | YNQ  | EEYV | RFDS |
| Chlorocebus_sabaeus      | MAALTVTL | MVLSSPL  | LALAGD | TRPRFL | EQVKSE | CHFFN | NGTER | VRYL | DRYF  | YNQ  | EEYV | RFDS |
| Homo_sapiens             | MAALTVTL | MVLSSPL  | LALAGD | TRPRFL | EQVKHE | CHFFN | NGTE  | --R  | FLDRY | FYHQ | EEYV | RFDS |
| Pongo_abelii             | MAALTVTL | MVLSSPL  | LALSGD | TQTRFL | EQVKSE | CHFFN | NGTER | VRFL | ERYF  | YNQ  | EEYV | HFDS |

123456789012345678901234567890123456789--012345678901234567

1 2 3 4 5

|                          |         |         |       |      |       |        |       |       |       |       |      |      |      |     |
|--------------------------|---------|---------|-------|------|-------|--------|-------|-------|-------|-------|------|------|------|-----|
| Brachyteles_arachnoides  | DVGEFRA | VTLEGR  | RSAEY | YNSQ | KDFL  | ERMRA  | SVDT  | -     | CRHNY | GVGES | SFTV | QRRV | QPKV | TVY |
| Callithrix_jacchus       | DVGEFRA | VTLEGR  | PVAES | WNSR | KDILE | QRRAA  | AVDT  | -     | CRHNY | EGFET | FLV  | PRRV | QPKV | TVY |
| Aotus_nancymaae          | DVGEYRA | VTLEGR  | PDAEY | WNSQ | KDYVE | QKRG   | QVDNY | CRHNY | GVFES | SFTV  | QRRV | QPKV | TVY  |     |
| Cebus_capucinus_imitator | DVGEYRA | VTLEGR  | PSAEY | WNSQ | KELLE | QKRG   | QVDNY | CRHNY | RVGES | SFTV  | QRRV | QPKV | TVY  |     |
| Saimiri_boliviensis      | DVGEFRA | VTLEGR  | PDAES | WNSQ | EDILE | QRAE   | VDK   | -     | CRFNY | GVLER | FLV  | PQV  | QPKV | TVY |
| Macaca_nemestrina        | DVGEYRA | VTLEGR  | PDAEY | WNGQ | KDILE | QKRG   | QVDNY | CRHNY | GVAES | SFTV  | QRRV | QAKV | TVY  |     |
| Chlorocebus_sabaeus      | DVGEFRA | VSELEGR | PDAEN | WNSR | KDILE | EDERAS | VDTY  | CRHNY | GVGES | SFTV  | QRRV | QPKV | TVY  |     |
| Homo_sapiens             | DVGEYRA | VTLEGR  | PDAEY | WNSQ | KDILE | QRRAE  | AVDT  | -     | CRHNY | GVVES | SFTV | QRRV | YPEV | TVY |
| Pongo_abelii             | DVGEYRA | VTLEGR  | PDAEY | WNSQ | KNLLE | QKRG   | QVDNY | CRHNY | GVGES | SFTV  | QRRV | QPKV | TVY  |     |

89012345678901234567890123456789012-3456789012345678901234567890123456

58 6 7 8 9 100 1

----- Ig-like C1-type -----

|                          |         |       |       |      |      |      |      |       |      |      |      |      |      |     |
|--------------------------|---------|-------|-------|------|------|------|------|-------|------|------|------|------|------|-----|
| Brachyteles_arachnoides  | PAKTQPL | QHHLN | LLVCS | VSGF | YPGS | IEVR | WFRN | DQEEK | AGVV | STGL | IQNG | DWTF | QTLV | MLE |
| Callithrix_jacchus       | PAKTQPL | QHHLN | LLVCS | VSGF | YPGS | IEVR | WFRN | DQEEK | AGVV | STGL | IQNG | DWTF | QTLV | MLE |
| Aotus_nancymaae          | PAKTQPL | QHHLN | LLVCS | VSGF | YPGS | IEVR | WFRN | NQEEK | AGVV | STGL | IQNG | DWTF | QTLV | MLE |
| Cebus_capucinus_imitator | PAKTQPL | QHHS  | LLVCS | VSGF | YPGS | IEVR | WFRN | GQEEK | AGVV | STGL | IQNG | DWTF | QTLV | MLE |
| Saimiri_boliviensis      | PAKTQPL | QHHLN | LLVCS | VSGF | YPGS | IEVR | WFRN | DQEEK | AGVV | STGL | IQNG | DWTF | QTLV | MLE |
| Macaca_nemestrina        | PAKTQPL | QHHLN | LLVCS | VNGF | YPGS | IEVR | WFRN | GQEEK | AGVV | STGL | IQNG | DWTF | QTLV | MLE |
| Chlorocebus_sabaeus      | PAKTQPL | QHHT  | LLVCS | VNGF | YPGS | IEVR | WFRN | GQEEK | AGVV | STGL | IQNG | DWTF | QTLV | MLE |
| Homo_sapiens             | PAKTQPL | QHHLN | LLVCS | VNGF | YPGS | IEVR | WFRN | GQEEK | TGVV | STGL | IQNG | DWTF | QTLV | MLE |
| Pongo_abelii             | PSKTQPL | QHHLN | LLVCS | VNGF | YPGS | IEVR | WFRN | GQEEK | TGVV | STGL | IQNG | DWTF | QTLV | MLE |

7890123456789012345678901234567890123456789012345678901234567890123456

117 2 3 4 5 6 7

|                          |         |       |       |       |       |       |         |      |      |       |     |     |       |
|--------------------------|---------|-------|-------|-------|-------|-------|---------|------|------|-------|-----|-----|-------|
| Brachyteles_arachnoides  | TVPQSGE | VYTCQ | VEHPS | VMSPI | TVQWR | ARSE  | SAQSK   | NLSG | VGGF | VLGLL | FLG | AGL | FIYFR |
| Callithrix_jacchus       | TVPQSGE | VYTCQ | VEHPS | VMSPT | TVQWR | ARQSE | SAQSK   | NLSG | VGGF | VLGLL | FLG | AGL | FIYFR |
| Aotus_nancymaae          | TVPQSGE | VYTCQ | VEHPS | VMTT  | PITVQ | WRARQ | SESAQSK | NLSG | VGGF | VLGLL | FLG | AGL | FIYFR |
| Cebus_capucinus_imitator | TVPQSGE | VYTCQ | VEHPS | VMSPT | TVQWR | ARQSE | SAQSK   | NLSG | VGGF | VLGLL | FLG | AGL | FIYFR |
| Saimiri_boliviensis      | TVPQSGE | VYTCQ | VEHPS | VMSPI | TVQWR | ARQSE | SAQRK   | NLSG | VGGF | VLGLL | FLG | AGL | FIYFR |
| Macaca_nemestrina        | TVPRSGE | VYTCQ | VEHPS | VMSPT | TVQWR | ARQSE | SAQSK   | NLSG | VGGF | VLGLL | FLG | AGL | FIYFR |
| Chlorocebus_sabaeus      | TVPRSGE | VYTCQ | VEHPS | VMSPT | TVQWR | ARQSE | SAQSK   | NLSG | VGGF | VLGLL | FLG | AGL | FIYFR |
| Homo_sapiens             | TVPRSGE | VYTCQ | VEHPS | LTSP  | TVQWR | ARQSE | SAQSK   | NLSG | VGGF | VLGLL | FLG | AGL | FIYFR |
| Pongo_abelii             | TVPRSGE | VYTCQ | VEHPS | VMSPT | TVQWR | ARQSE | SAQSK   | NLSG | VGGF | VLGLL | FLA | AGL | FIYFR |

7890123456789012345678901234567890123456789012345678901234567890123456

177 8 9 200 1 2 3

|                          |       |        |
|--------------------------|-------|--------|
| Brachyteles_arachnoides  | NQKGG | SGLQPT |
| Callithrix_jacchus       | NQKGR | SGLQPT |
| Aotus_nancymaae          | NQKGG | SGLQPT |
| Cebus_capucinus_imitator | NQKGR | SGLQPT |
| Saimiri_boliviensis      | NQKGH | SGLQPT |
| Macaca_nemestrina        | NQKGH | SGLQPT |
| Chlorocebus_sabaeus      | NQKGH | SGLQPT |
| Homo_sapiens             | NQKGH | SGLQPT |
| Pongo_abelii             | NQKGH | SGLPPT |

78901234567

237 4

MEF2D

|----- Transcription factor MADS-box -----|

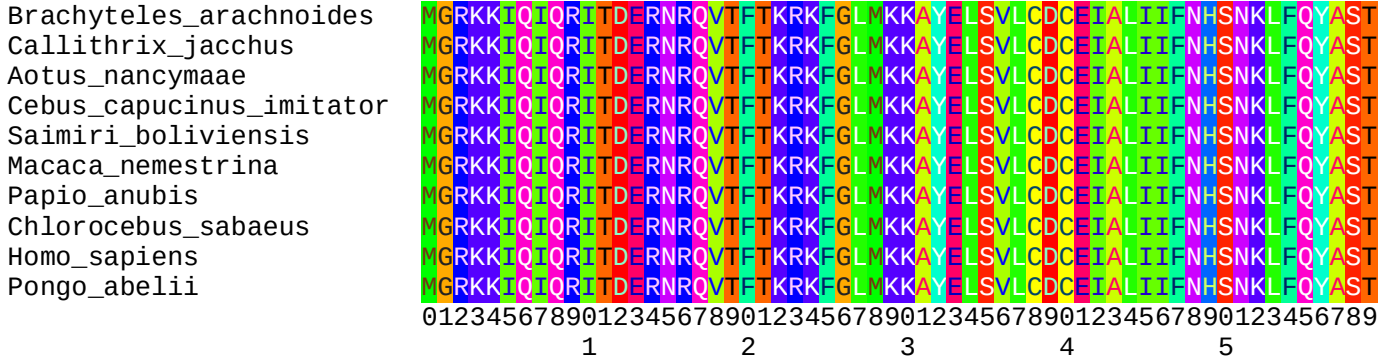

|-----

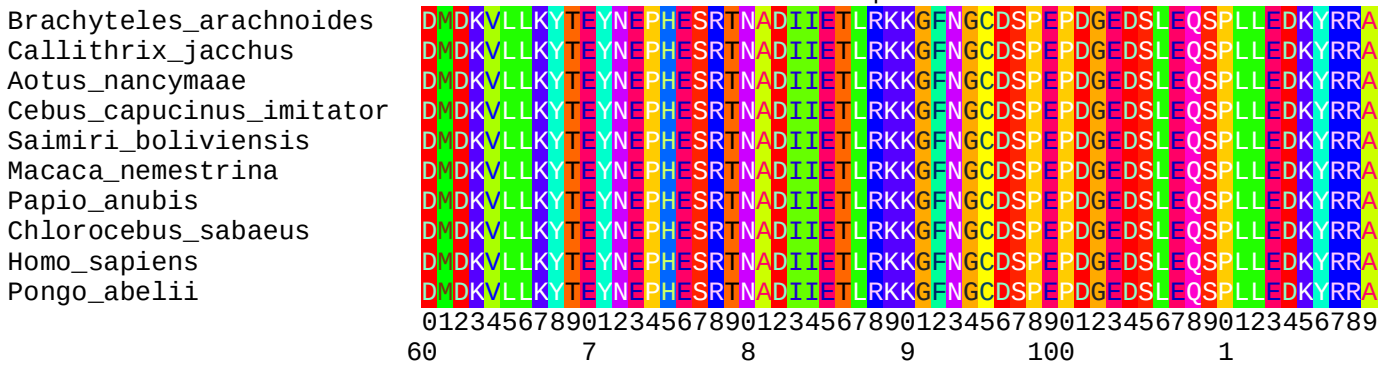

Holliday junction regulator

|-----

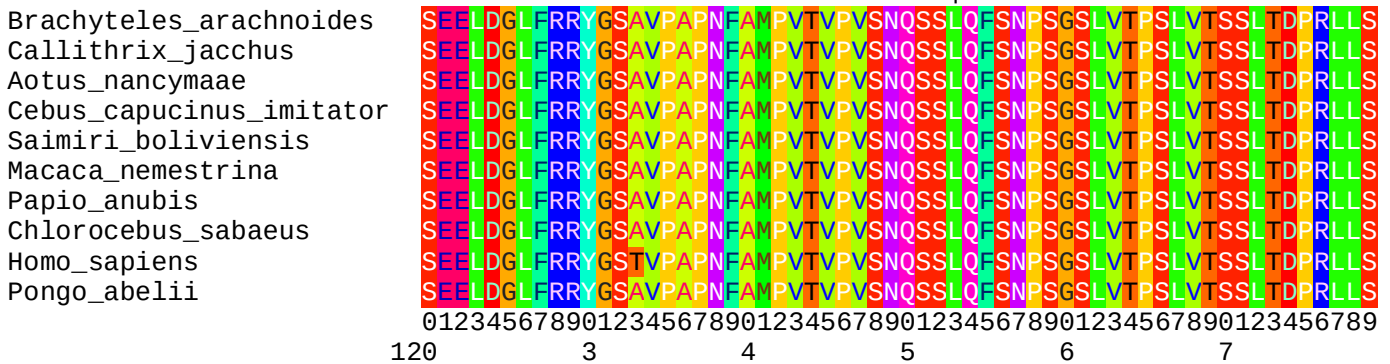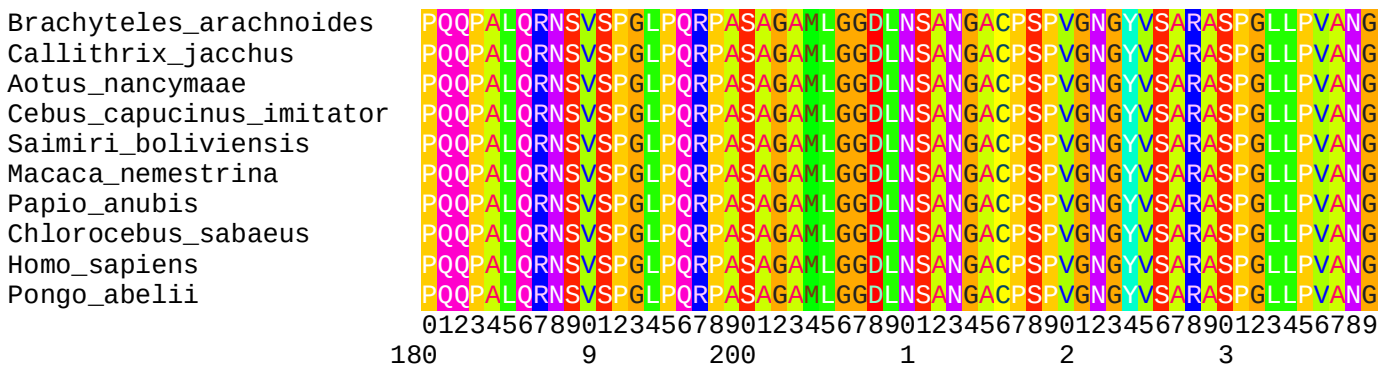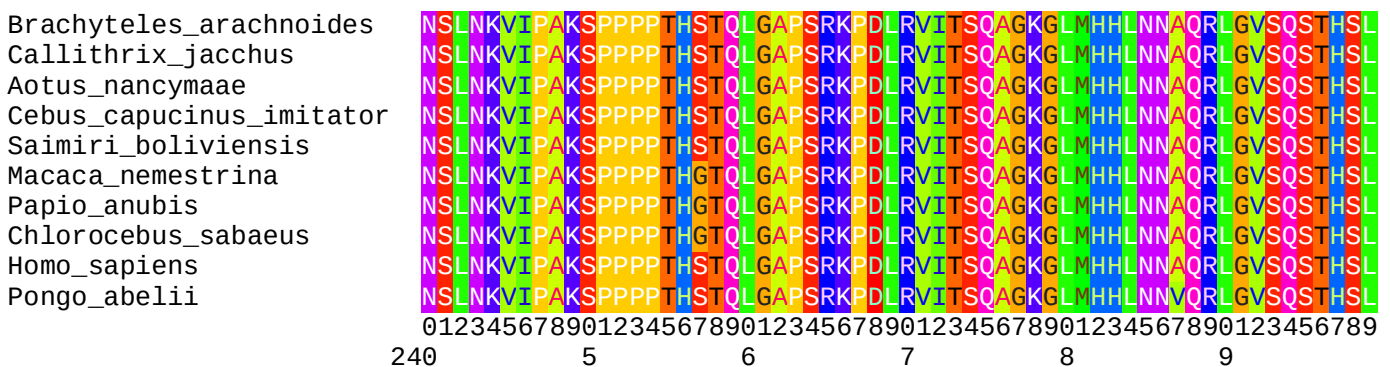

```

|--
Brachyteles_arachnoides TTPVWSVATPSLLSQGLPFSSMPTAYNTDYQLTSAELSSLPAFSSPGGLSLGNVTAWQQP
Callithrix_jacchus TTPVWSVATPSLLSQGLPFSSMPTAYNTDYQLTSAELSSLPAFSSPGGLSLGNVTAWQQP
Aotus_nancymaae TTPVWSVATPSLLSQGLPFSSMPTAYNTDYQLTSAELSSLPAFSSPGGLSLGNVTAWQQP
Cebus_capucinus_imitator TTPVWSVATPSLLSQGLPFSSMPTAYNTDYQLTSAELSSLPAFSSPGGLSLGNVTAWQQP
Saimiri_boliviensis TTPVWSVATPSLLSQGLPFSSMPTAYNTDYQLTSAELSSLPAFSSPGGLSLGNVTAWQQP
Macaca_nemestrina TTPVWSVATPSLLSQGLPFSSMPTAYNTDYQLTSAELSSLPAFSSPGGLSLGNVTAWQQP
Papio_anubis TTPVWSVATPSLLSQGLPFSSMPTAYNTDYQLTSAELSSLPAFSSPGGLSLGNVTAWQQP
Chlorocebus_sabaeus TTPVWSVATPSLLSQGLPFSSMPTAYNTDYQLTSAELSSLPAFSSPGGLSLGNVTAWQQP
Homo_sapiens TTPVWSVATPSLLSQGLPFSSMPTAYNTDYQLTSAELSSLPAFSSPGGLSLGNVTAWQQP
Pongo_abelii TTPVWSVATPSLLSQGLPFSSMPTAYNTDYQLTSAELSSLPAFSSPGGLSLGNVTAWQQP
012345678901234567890123456789012345678901234567890123456789
300 1 2 3 4 5

```

-- Gln/Pro-rich -----|

```

* *
Brachyteles_arachnoides QQPQQPQQPQQPQ---PQQPQPQPQQPQQPQQPQQPQQPQSHLVPVSLSNLIPGSPLPHVGA
Callithrix_jacchus QQPQQPQQPQQPQ---PQPQQPQPQPQQPQQPQQPQQPQQPQSHLVPVSLSNLIPGSPLPHVGA
Aotus_nancymaae QQPQQPQQPQQPQQPQQPQQPQQPQQPQQPQQPQQPQQPQQPQSHLVPVSLSNLIPGSPLPHVGA
Cebus_capucinus_imitator QQPQQPQQPQQPQQPQQPQQPQQPQQPQQPQQPQQPQQPQQPQSHLVPVSLSNLIPGSPLPHVGA
Saimiri_boliviensis QQPQQPQQPQQPQ---PQPQQPQPQPQQPQQPQQPQQPQQPQSHLVPVSLSNLIPGSPLPHVGA
Macaca_nemestrina QQPQQPQQPQQPQQPQQPQQPQQPQQPQQPQQPQQPQQPQQPQSHLVPVSLSNLIPGSPLPHVGA
Papio_anubis QQPQQPQQPQQPQQPQQPQQPQQPQQPQQPQQPQQPQQPQQPQSHLVPVSLSNLIPGSPLPHVGA
Chlorocebus_sabaeus QQPQQPQQPQQPQQPQQPQQPQQPQQPQQPQQPQQPQQPQQPQSHLVPVSLSNLIPGSPLPHVGA
Homo_sapiens QQPQQPQQPQQPQ---PQPQQPQPQPQQPQQPQQPQQPQQPQSHLVPVSLSNLIPGSPLPHVGA
Pongo_abelii QQPQQPQQPQQPQQPQQPQQPQQPQQPQQPQQPQQPQQPQQPQSHLVPVSLSNLIPGSPLPHVGA
0123456789012---34567890123456789012345678901234567890123456
360 7 8 9 400 1

```

```

Brachyteles_arachnoides LTVTTHPHISIKSEPVSPSRERSAPPPPAVFPAARPEPGDGLSSPAGGSYETGDRDDGR
Callithrix_jacchus LTVTTHPHISIKSEPVSPSRERSAPPPPAVFPAARPEPGDGLSSPAGGSYETGDRDDGR
Aotus_nancymaae LTVTTHPHISIKSEPVSPSRERSAPPPPAVFPAARPEPGDGLSSPAGGSYETGDRDDGR
Cebus_capucinus_imitator LTVTTHPHISIKSEPVSPSRERSAPPPPAVFPAARPEPGDGLSSPAGGSYETGDRDDGR
Saimiri_boliviensis LTVTTHPHISIKSEPVSPSRERSAPPPPAVFPAARPEPGDGLSSPAGGSYETGDRDDGR
Macaca_nemestrina LTVTTHPHISIKSEPVSPSRERSAPPPPAVFPAARPEPGDGLSSPAGGSYETGDRDDGR
Papio_anubis LTVTTHPHISIKSEPVSPSRERSAPPPPAVFPAARPEPGDGLSSPAGGSYETGDRDDGR
Chlorocebus_sabaeus LTVTTHPHISIKSEPVSPSRERSAPPPPAVFPAARPEPGDGLSSPAGGSYETGDRDDGR
Homo_sapiens LTVTTHPHISIKSEPVSPSRERSAPPPPAVFPAARPEPGDGLSSPAGGSYETGDRDDGR
Pongo_abelii LTVTTHPHISIKSEPVSPSRERSAPPPPAVFPAARPEPGDGLSSPAGGSYETGDRDDGR
789012345678901234567890123456789012345678901234567890123456
417 2 3 4 5 6 7

```

```

Brachyteles_arachnoides GDFGPTLGLLRPAEPEAEAGSAVKRMRLDTWTLK
Callithrix_jacchus GDFGPTLGLLRPAEPEAEAGSAVKRMRLDTWTLK
Aotus_nancymaae GDFGPTLGLLRPAEPEAEAGSAVKRMRLDTWTLK
Cebus_capucinus_imitator GDFGPTLGLLRPAEPEAEAGSAVKRMRLDTWTLK
Saimiri_boliviensis GDFGPTLGLLRPAEPEAEAGSAVKRMRLDTWTLK
Macaca_nemestrina GDFGPTLGLLRPAEPEAEAGSAVKRMRLDTWTLK
Papio_anubis GDFGPTLGLLRPAEPEAEAGSAVKRMRLDTWTLK
Chlorocebus_sabaeus GDFGPTLGLLRPAEPEAEAGSAVKRMRLDTWTLK
Homo_sapiens GDFGPTLGLLRPAEPEAEAGSAVKRMRLDTWTLK
Pongo_abelii GDFGPTLGLLRPAEPEAEAGSAVKRMRLDTWTLK
7890123456789012345678901234567890
477 8 9 500 1

```

MINDY2

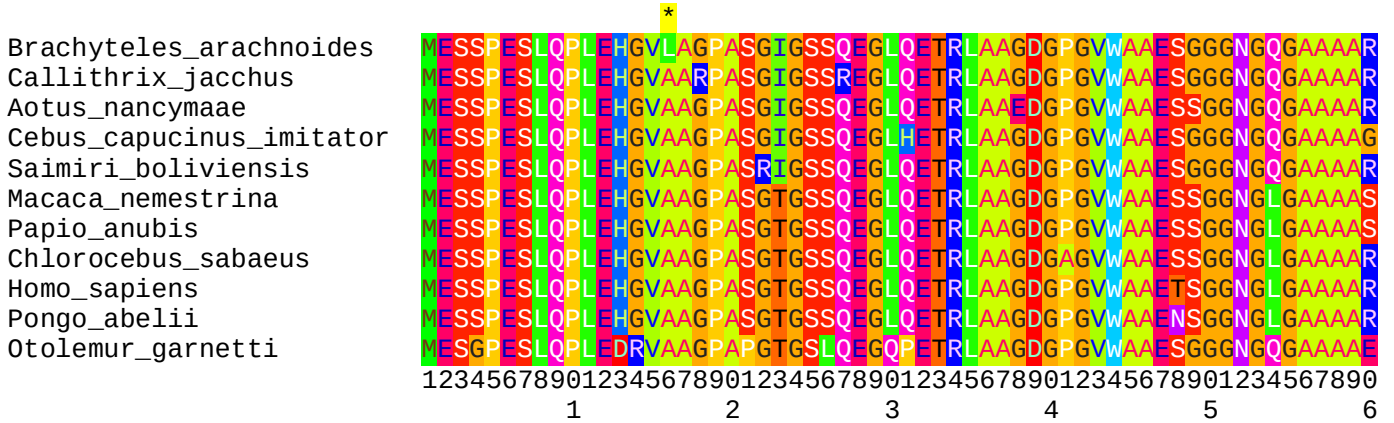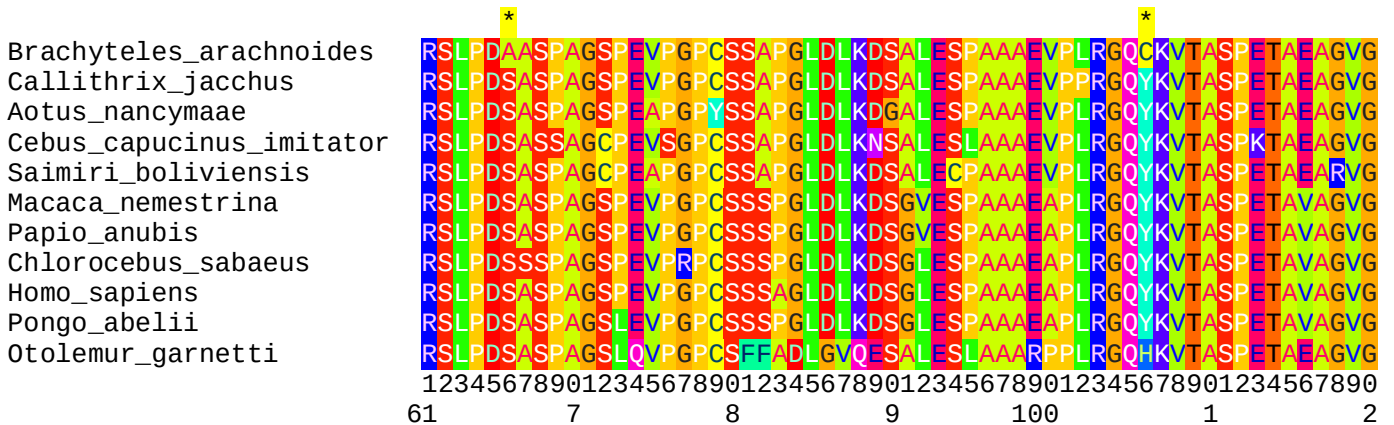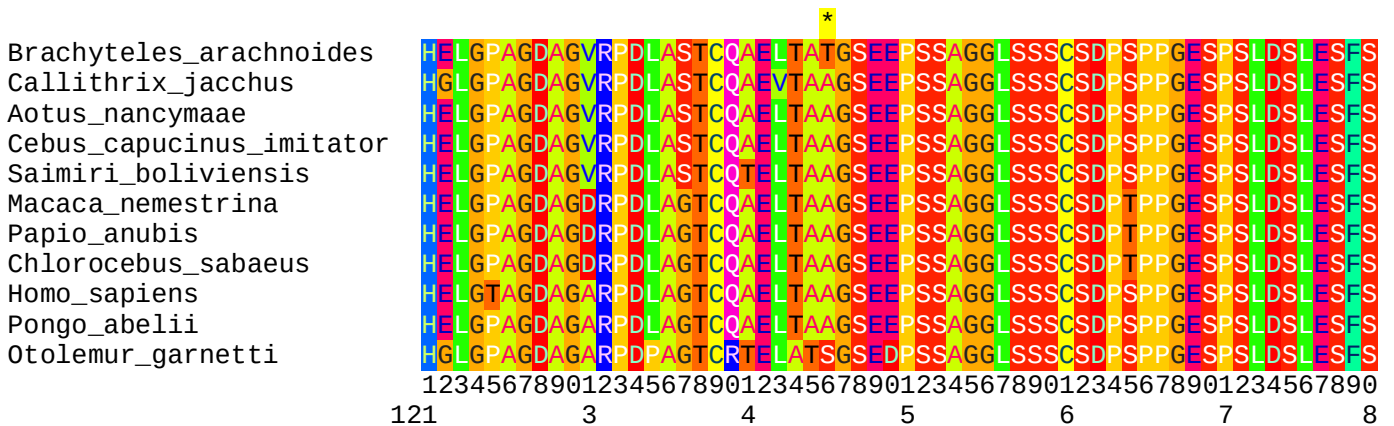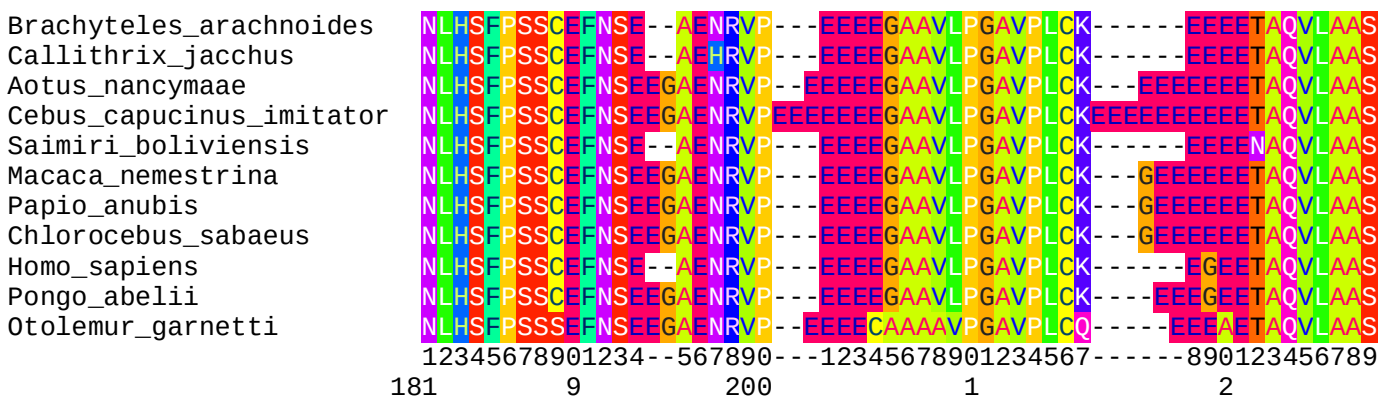

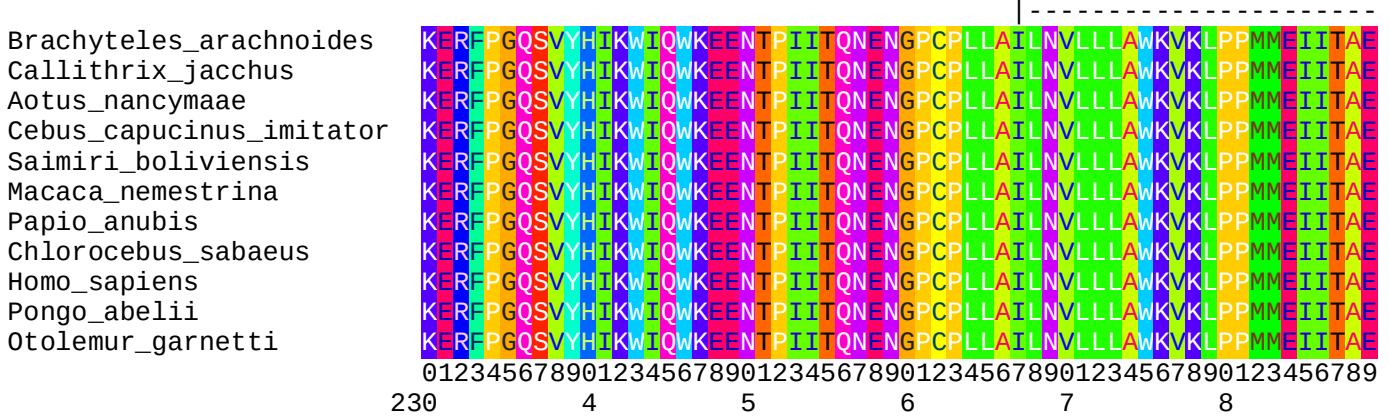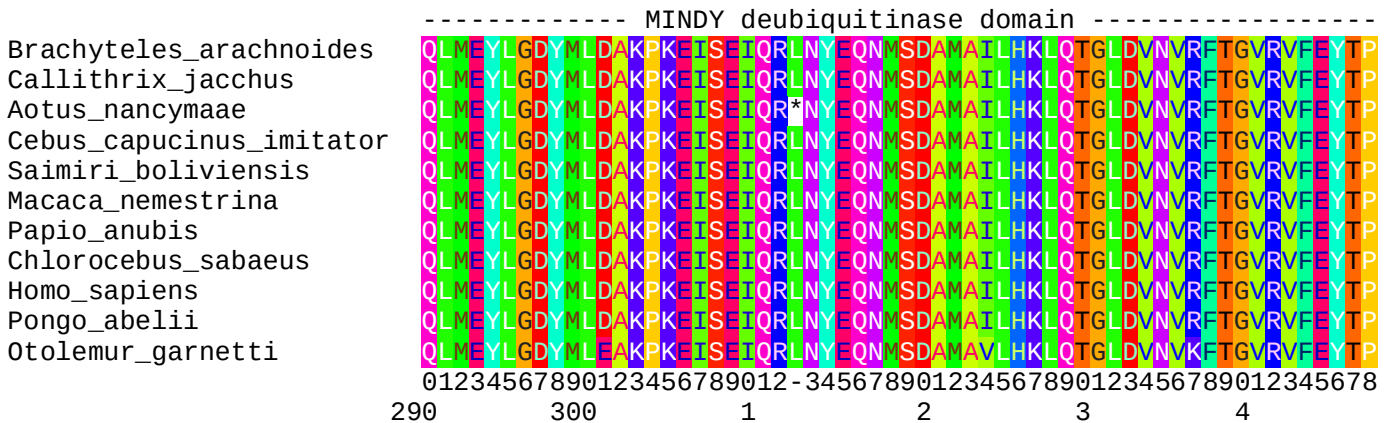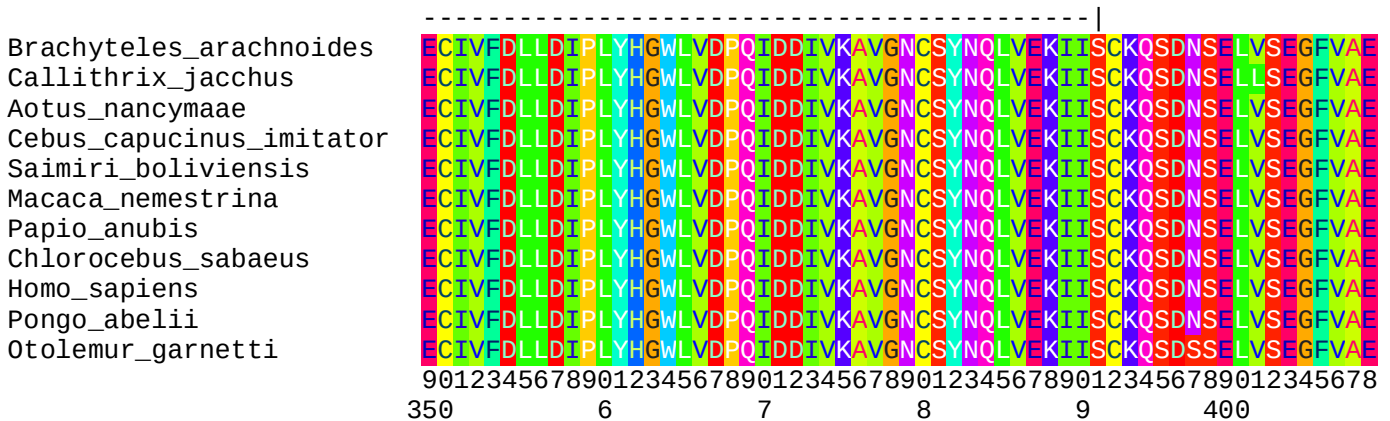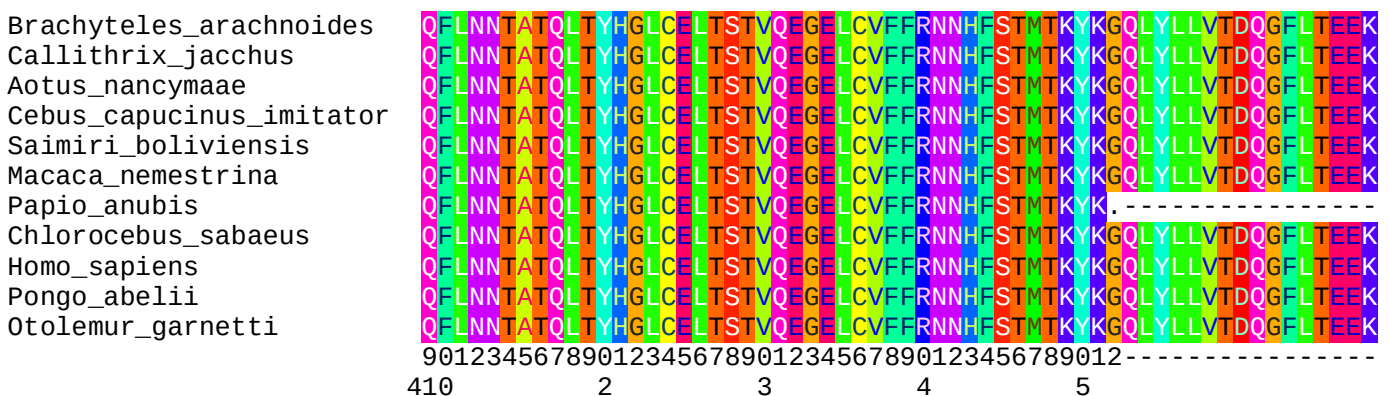



|                          |                                                                  |
|--------------------------|------------------------------------------------------------------|
| Brachyteles_arachnoides  | IVWESLHNVDG DGNFC DSEFHLRPPSDPETVYKGGQQDQIDQDYLMALSLQQEQQSQEIINW |
| Callithrix_jacchus       | VVWESLHNVDG DGNFC DSEFHLRPPSDPETVYKGGQQDQIDQDYLMALSLQQEQQSQEIINW |
| Aotus_nancymae           | VVWESLHNVDG DGNFC DSEFHLRPPSDPETVYKGGQQDQIDQDYLMALSLQQEQQSQEIINW |
| Cebus_capucinus_imitator | VVWESLHNVDG DGNFC DSEFHLRPPSDPETVYKGGQQDQIDQDYLMALSLQQEQQSQEIINW |
| Saimiri_boliviensis      | VVWESLHNVDG DGNFC DSEFHLRPPSDPETVYKGGQQDQIDQDYLMALSLQQEQQSQEIINW |
| Macaca_nemestrina        | VVWESLHNVDG DGNFC DSEFRLRPPSDPETVYKGGQQDQIDQAGPASTLS-----IKW     |
| Papio_anubis             | -----                                                            |
| Chlorocebus_sabaeus      | VVWESLHNVDG DGNFC DSEFHLRPPSDPETVYKGGQQDQIDQDYLMALSLQQEQQSQEIINW |
| Homo_sapiens             | VVWESLHNVDG DGNFC DSEFHLRPPSDPETVYKGGQQDQIDQDYLMALSLQQEQQSQEIINW |
| Pongo_abelii             | VVWESLHNVDG DGNFC DSEFHLRPPSDPETVYKGGQQDQIDQDYLMALSLQQEQQSQEIINW |
| Otolemur_garnetti        | VVWESLHNVDG DGNFC DSEFHLRPPSDPETVYKGGQQDQIDQDYLMALSLQQEQQSQEIINW |

|                          |                                                              |
|--------------------------|--------------------------------------------------------------|
| Brachyteles_arachnoides  | EQIPEGISDLELAKKLQEEEDRRASQYYQEQQ-AAAAAAAASTQAQQGQPTQASPSSGRQ |
| Callithrix_jacchus       | EQIPEGISDLELAKKLQEEEDRRASQYYQEQQ-AAAAAAAASTQAQQGQPTQASPSSGRQ |
| Aotus_nancymae           | EQIPEGISDLELAKKLQEEEDRRASQYYQEQQAAAAAAAASTQAQQGQPTQASPSSGRQ  |
| Cebus_capucinus_imitator | EQIPEGISDLELAKKLQEEEDRRASQYYQEQQAAAAAAAASTQAQQGQPTQASPSSGRQ  |
| Saimiri_boliviensis      | EQIPEGISDLELAKKLQEEEDRRASQYYQEQQ-AASAAAASTQAQQGQPTQASPSSGRQ  |
| Macaca_nemestrina        | KTIWE**T*TE-----                                             |
| Papio_anubis             | -----                                                        |
| Chlorocebus_sabaeus      | EQIPEGISDLELAKKLQEEEDRRASQYYQEQQAAAAAAAASTQVQQGQPAQASPSSGRQ  |
| Homo_sapiens             | EQIPEGISDLELAKKLQEEEDRRASQYYQEQQ-AAAAAAAASTQAQQGQPAQASPSSGRQ |
| Pongo_abelii             | EQIPEGISDLELAKKLQEEEDRRASQYYQEQQAAAAAAAASTQAQQGQPAQASPSSGRQ  |
| Otolemur_garnetti        | -----                                                        |

|                          |                              |
|--------------------------|------------------------------|
| Brachyteles_arachnoides  | SGNSERKRKEPREKDKEKEKEKNSCVIL |
| Callithrix_jacchus       | SGNSERKRKEPREKDKEKEKEKNSCVIL |
| Aotus_nancymae           | SGNSERKRKEPREKDKEKEKEKNSCVIL |
| Cebus_capucinus_imitator | SGNSERKRKEPREKDKEKEKEKNSCVIL |
| Saimiri_boliviensis      | SGSSERKRKEPREKDKEKEKEKNSCVIL |
| Macaca_nemestrina        | -----,EPREKDKEKEKEKNSCVIL    |
| Papio_anubis             | -----                        |
| Chlorocebus_sabaeus      | SGNSERKRKEPREKDKEKEKEKNSCVIL |
| Homo_sapiens             | SGNSERKRKEPREKDKEKEKEKNSCVIL |
| Pongo_abelii             | SGNSERKRKEPREKDKEKEKEKNSCVIL |
| Otolemur_garnetti        | -----                        |

MRPS14

| Signal Pept |

|                          | 1           | 2            | 3            | 4            | 5               | 6 |
|--------------------------|-------------|--------------|--------------|--------------|-----------------|---|
| Brachyteles_arachnoides  | MAGSTLGFVLR | TFKQMPSSASG  | QVRGYYVDWRM  | WRDVKRRKMAYE | EYADERLRVNSLRKN |   |
| Callithrix_jacchus       | MAASVLGSVLR | TFKQMPSSASG  | QVRGYYVDWRM  | WRDVKRRKMAYE | EYADERLRVNSLRKN |   |
| Aotus_nancymae           | MAVSVLGSVLR | MFKQMPSSASG  | QVRGYYVDWRM  | WRDVKRRKMAYE | EYADERLRVNSLRKN |   |
| Cebus_capucinus_imitator | MAASVLGSVLR | TFKQMPSSASG  | QVRGYYVDWRM  | WRDVKRRKMAYE | EYADERLRVNSLRKN |   |
| Saimiri_boliviensis      | MAASVLGSVLR | AFKQMPSSASG  | QVRGYYVDWRM  | WRDVKRRKMAYE | EYADERLRVNSLRKN |   |
| Macaca_nemestrina        | MAAFMLGSLLR | TFKQMPSSASG  | QVRSHYYVDWRM | WRDVKRRKMAYE | EYADERLRINSLRKN |   |
| Papio_anubis             | MAAFMLGSLLR | TFKQMPSSASG  | QVRSHYYVDWRM | WRDVKRRKMAYE | EYADERLRINSLRKN |   |
| Chlorocebus_sabaeus      | MAAFMLGSLLR | MFKQMPSSASG  | QVRSHYYVDWRM | WRDVKRRKMAYE | EYADERLRINSLRKN |   |
| Homo_sapiens             | MAAFMLGSLLR | TFKQMPSSASG  | QVRSHYYVDWRM | WRDVKRRKMAYE | EYADERLRINSLRKN |   |
| Pongo_abelii             | MAAFMLCSLLR | RFKQMPSSASG  | QVRSHYYVDWRM | WRDVKRRKMAYE | EYADERLRINSLRKN |   |
| Otolemur_garnetti        | MAAYVLGSLLR | TFRQVGPASASG | QVRGYYVDWRML | RDVKRRKMAYE  | EYADERLRINALRKN |   |

|----- Ribosomal protein S14/S29 -----|

|                          |                    |                  |                 |                 |
|--------------------------|--------------------|------------------|-----------------|-----------------|
| Brachyteles_arachnoides  | TILPKLLQDVADEEIAAF | PRDSCPVRIRNRCVMT | SRPRGVKRRWRL    | SRIVFRHLADHGQL  |
| Callithrix_jacchus       | TILPKLLQDVADEEIAAF | PRDSCPVRIRNRCVMT | SRPRGVKRRWRL    | SRIVFRHLADHGQL  |
| Aotus_nancymae           | TILPKLLQDVADEEIAAF | PRDSCPVRIRNRCVLT | SRPRGVKRRWRL    | SRIVFRHLADHGQL  |
| Cebus_capucinus_imitator | TILPKLLQDVADEEIAAF | PRDSCPVRIRNRCVMT | SRPRGVKRRWRL    | SRIVFRHLADHGQL  |
| Saimiri_boliviensis      | TILPKLLQDVADEEIAAF | PRDSCPVRIRNRCVMT | SRPRGVKRRWRL    | SRIVFRHLADHGQL  |
| Macaca_nemestrina        | TXLPKILQDVADEEIAAL | PRDSCPVRNQESV    | CYDVRPRGVKRRWRL | SRIVFRHLADN-QQL |
| Papio_anubis             | TILPKILQDVADEEIAAL | PRDSCPVRIRNRCVMT | SRPRGVKRRWRL    | SRIVFRHLADHGQL  |
| Chlorocebus_sabaeus      | TILPKILQDVADEEIAAL | PRDSCPVRIRNRCVMT | SRPRGVKRRWRL    | SRIVFRHLADHGQL  |
| Homo_sapiens             | TILPKILQDVADEEIAAL | PRDSCPVRIRNRCVMT | SRPRGVKRRWRL    | SRIVFRHLADHGQL  |
| Pongo_abelii             | TILPKILQDVADEEIAAL | PRDSCPVRIRNRCVMT | SRPRGVKRRWRL    | SRIVFRHLADHGQL  |
| Otolemur_garnetti        | TILPKDIQVADEEIAAL  | PRDSCPVRIRNRCVMT | SRPRGVKRRWRL    | SRIVFRHLADHGQL  |

61 7 8 9 100 1 123456789012345678901234567-89

|                          |         |
|--------------------------|---------|
| Brachyteles_arachnoides  | SGVQRAM |
| Callithrix_jacchus       | SGVQRAM |
| Aotus_nancymae           | SGVQRAI |
| Cebus_capucinus_imitator | SGVQRA- |
| Saimiri_boliviensis      | SGVQRAM |
| Macaca_nemestrina        | SGIQRX- |
| Papio_anubis             | SGIQRX- |
| Chlorocebus_sabaeus      | SGIQRX- |
| Homo_sapiens             | SGIQRAT |
| Pongo_abelii             | SGIQRA- |
| Otolemur_garnetti        | SGVQRX- |

012345  
120

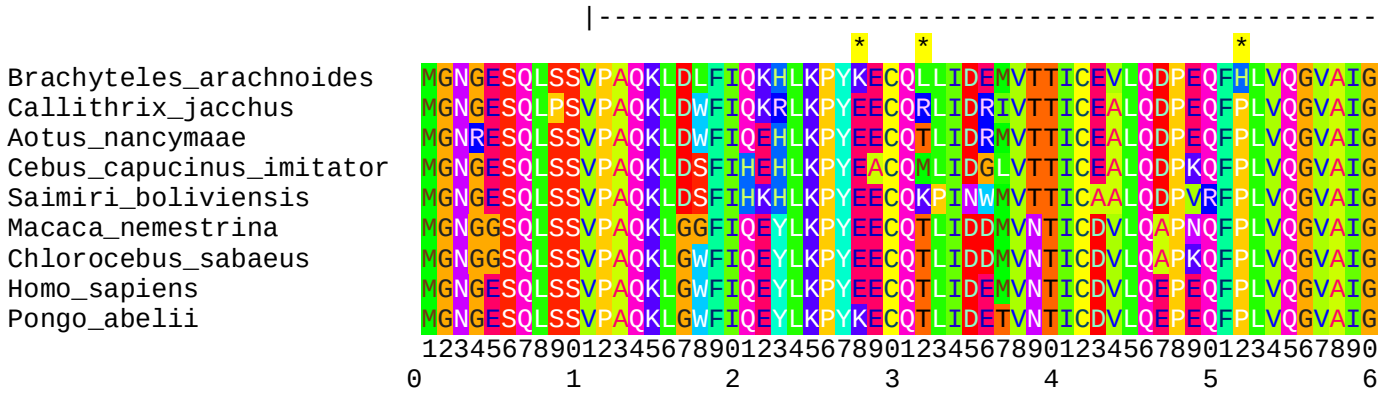

---- 2-50AS/ClassI-CCaase, nucleotidyltransferase domain ----

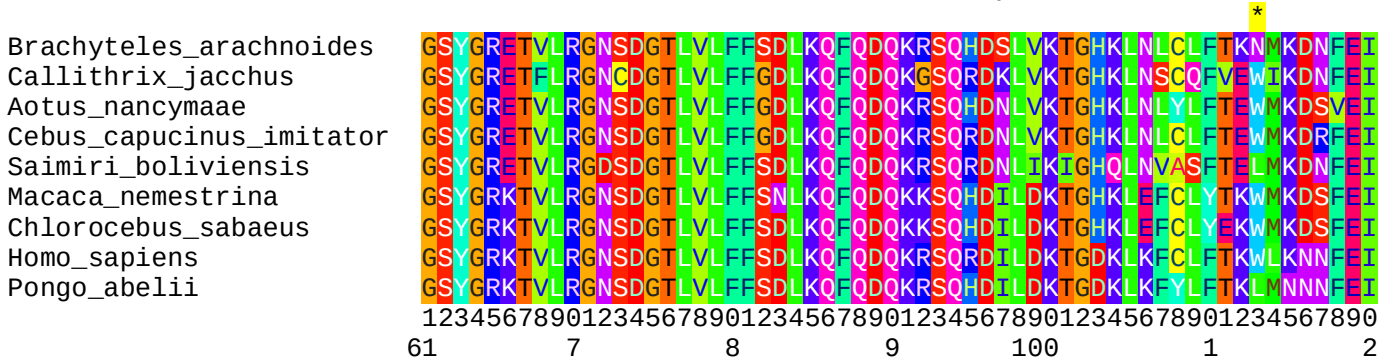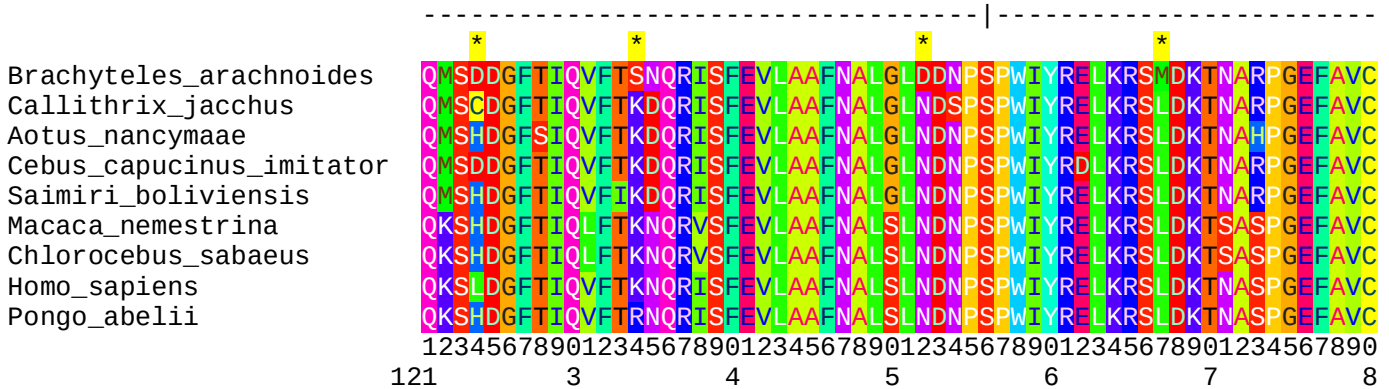

-- 2'-5'-oligoadenylate synthetase 1, domain 2/C-terminal --

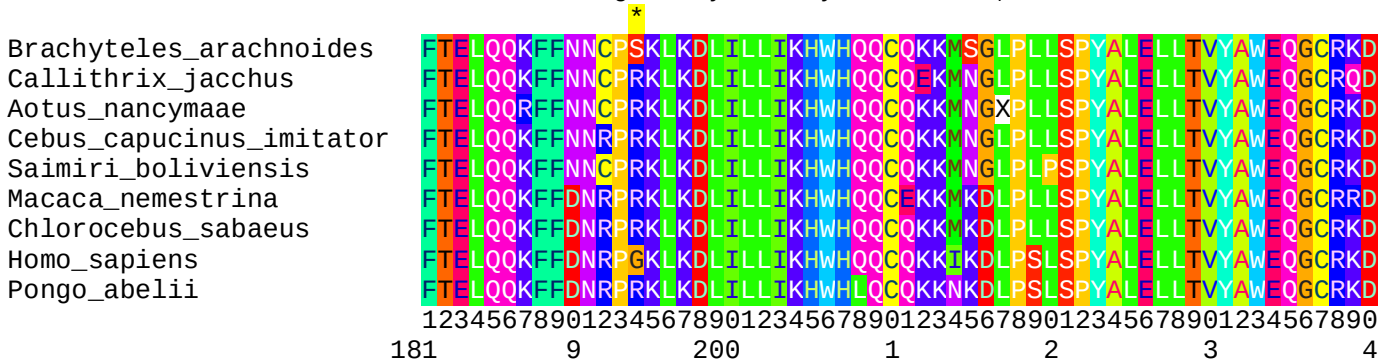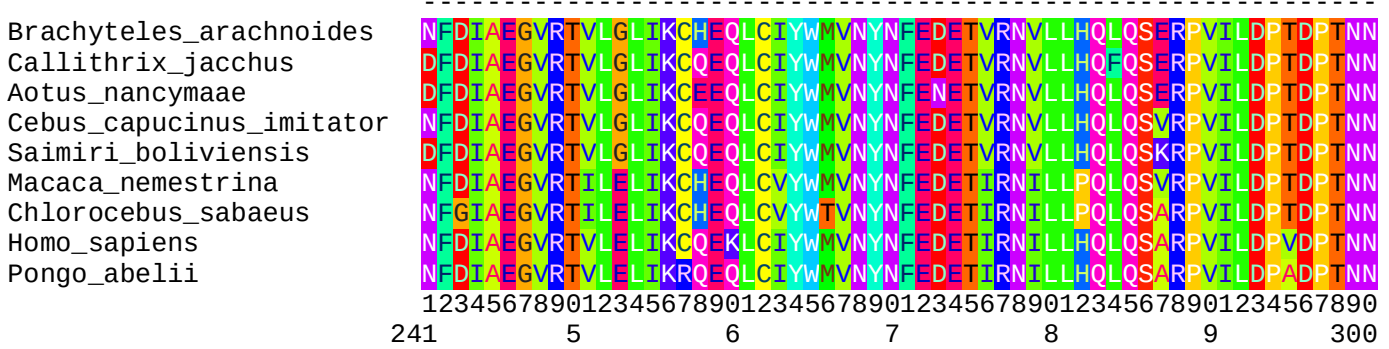

-----|

\* \* |

Brachyteles\_arachnoides V R G D Y R C W Q R L K Q E A Q T W L T S P N L D N E L P A P S W N V L P A P L F T T P G H R L D K F I K D F L Q P D K  
 Callithrix\_jacchus V S G D Y R C W Q R L K Q E A Q T W L T S P N L D N E L P A P S W N V L P A P L F T T L G H H L D K F I K D F L Q P D K  
 Aotus\_nancymaae V S G D N R C W Q R L K Q E A Q T W L T S P S L D N E L P A P S W N V L P A P L F T T P G H R L D K F I K D F L Q P D K  
 Cebus\_capucinus\_imitator V S G D N R C W Q R L K Q E A Q T W L T S P Q L D N E L P A P S W N V L P A P L F T T P G H C L D K F I K D F L Q P D K  
 Saimiri\_boliviensis V S G D N R C W Q R L K Q E A Q T W L T S P N L D N E L P A P S W N V L P A P L F T T P G H C L D K F I K D F L Q P D K  
 Macaca\_nemestrina V S G D K R C W Q W L K K E A Q T W L T S P N L D N E L P A P S W N V L P A P L F T T P G H L L D K F I K E F L Q P N K  
 Chlorocebus\_sabaeus V S G D K R C W Q W L K K E A Q T W L T S P N L D N E L P A P S W N V L P A P L F T T P G H L L D K F I K E F L Q P N K  
 Homo\_sapiens V S G D K I C W Q W L K K E A Q T W L T S P N L D N E L P A P S W N V L P A P L F T T P G H L L D K F I K E F L Q P N K  
 Pongo\_abelii V S G D K I C W Q R L K K E A Q T W L T S P N L D N E L P A P S W N V L P A P L F T T P G H L L D K F I K E F L Q P N K

123456789012345678901234567890123456789012345678901234567890

301 1 2 3 4 5 6

|--- 2-50AS/ClassI-CCAase, nucleotidyltransferase domain ---

Brachyteles\_arachnoides Y F L E Q I D S A V N I I C T F L K E N C F R Q S T A K I Q T V R G G S T A K G T A L K T G S D A D L V V F H N S L K S  
 Callithrix\_jacchus Y F L E Q V D S A V N I I C K F L E E N C F R R S T A K I Q T V Q G G S T A K G T A L K T G S D S D L V V F H N S L K S  
 Aotus\_nancymaae Y F L E Q V D I A I N I I C K F L E E N C F R Q S T A K I Q T V Q G G S T A K G T A L K T G S D A D L V V F H N S L K S  
 Cebus\_capucinus\_imitator Y F L E Q V D S A V N I I C K F L E E N C F R R S I A K I Q T V Q G G S T A K G T A L K T G S D G N L V V F H N S L K S  
 Saimiri\_boliviensis Y F L E Q V N G A V N I I C K F L E E N C F P Q S T A K I K T V Q G G S T A K G T A L K T G S D A D L V V F H N S L R S  
 Macaca\_nemestrina F F L E Q I D S A V D I I C T F L K E N C F R Q S T A K I Q I V Q G G S T A K G T A L K T G S D A N L V V F H N S L K S  
 Chlorocebus\_sabaeus F F L E Q I D S A V D M I C T F L K E N C F R Q S T A K I Q I V Q G G S T A K G T A L K T G S D V D L V V F H N S L K S  
 Homo\_sapiens C F L E Q I D S A V N I I R T F L K E N C F R Q S T A K I Q I V R G G S T A K G T A L K T G S D A D L V V F H N S L K S  
 Pongo\_abelii C F L E Q I D S A V N I I R T F L K E N C F R Q S T A K I Q I V R G G S T A K G T A L K T G S D A D L V V F H N S L K S

1234567890123456789012345678901234567890123456789012345678901234567890

361 7 8 9 400 1 2

-----|

\*\* |

Brachyteles\_arachnoides Y I C Q K N E R H K I I K E I H Q Q L E A F Q R E K K E E L E V R F E I S K W K A P R V L S F S L K S K V L N E S V N F  
 Callithrix\_jacchus Y T F Q K N E Q H K I I K E I H Q Q L E A F Q Q E K K E E L E V R F E I S R W K A P R V L S F S L K S K V L N E S V N F  
 Aotus\_nancymaae Y T S P K N E R H K I F K E I H Q Q L E A F Q R Q K K E E L E V R F E I S K W K A P R V L S F S L K S K V L N Q S V N F  
 Cebus\_capucinus\_imitator Y T S Q K N E R H K I I K E I H Q Q L E A F Q Q E K K E E L E V R F E I S K W E A P R V L S F S L K S K V L N E S V N F  
 Saimiri\_boliviensis Y T S Q K Y T G H N I M K E I H Q Q L E A F Q R E M E E E I E V R F E I S K W K A P R V L S F S L K S K V L N E S V S F  
 Macaca\_nemestrina Y T S Q K N E R Y R I I K E I H E Q L E T F W R E K K E E L E V S F E P P W K A P R V L S F S L K S K V L N E S V S F  
 Chlorocebus\_sabaeus Y T S Q K N E R Y R I I K E I Q E Q L E T F W R E K K E E L E V S F E L P W K A P R V L S F S L K S K V L N E S V S F  
 Homo\_sapiens Y T S Q K N E R H K I V K E I H E Q L K A F W R E K E E E L E V S F E P P K W K A P R V L S F S L K S K V L N E S V S F  
 Pongo\_abelii Y T S Q K N E R H K I V K E I H E Q L E A F W R E N K E E L E V S F E P P K W K A P R V L S F S L K S K V L N E S V S F

1234567890123456789012345678901234567890123456789012345678901234567890

421 3 4 5 6 7 8

-----|

Brachyteles\_arachnoides D V L P A F N A L G Q L S S G S T P S P E V Y A G L I D L Y K S S D L P G G E F S T C F T V L Q R N F I R T O P T K L K  
 Callithrix\_jacchus D V L P A F N A L G Q L S S G S T S S P E V Y A G L I D L Y K S S D L P G G E F S T C F T A L Q R N F I S S Q H T K L K  
 Aotus\_nancymaae D V L P A F N A L G Q L S S G S T S S P E V Y A G L I D L Y K S S D L P G G E F S T C F T A L Q R N F I R S Q D T K L K  
 Cebus\_capucinus\_imitator D V L P A F N A L G Q L S S G S T S S P E V Y A G L I D L Y K S S D L P G G E F S T C F T A L Q R N F I H S R H T K L K  
 Saimiri\_boliviensis N V L P A F N A L G Q L S S G S T S S P E V Y A E L I D L Y K S L D L P G G E F S T C F T V L Q R N F I H S R P T K L K  
 Macaca\_nemestrina D V L P A F N A L G Q L S S G S T P S P E V Y A G L L D L Y K S S D F P G G E F S T C F T V L Q R N F I C S R P T K L K  
 Chlorocebus\_sabaeus D V L P A F N A L G Q L S S G S T P T P E V Y A G L L D L Y K S S D F P G G E F S T C F T V L Q R D F I R S R P T K L K  
 Homo\_sapiens D V L P A F N A L G Q L S S G S T P S P E V Y A G L I D L Y K S S D L P G G E F S T C F T V L Q R N F I R S R P T K L K  
 Pongo\_abelii D V L P A F N A L G Q R S S G S T P S P E V Y A G L I D L Y K S S D L P G G E F S T C F T V L Q R N F I R S R P T K L K

1234567890123456789012345678901234567890123456789012345678901234567890

481 9 500 1 2 3 4

-- 2'-5'-oligoadenylate synthetase 1, domain 2/C-terminal --

Brachyteles\_arachnoides D L I R L V K H W Y K E C E R K L K P K G S L P P K Y A L E L L T V Y A W E Q G S G V L D F D T A E G F R T V L G L V T  
 Callithrix\_jacchus D L I R L V K H W Y K E C E R K L K P K G S L P P K Y A L E L L T V Y A W E Q G S G Q P D F D T A E G F R T V L E L V T  
 Aotus\_nancymaae D L I R L V K H W Y K E C E R K L K P K G S L P P K Y A L E L L T V Y A W E Q G S G P D F D T A E G F R T V L E L V T  
 Cebus\_capucinus\_imitator D L I R L V K H W Y Q E C E R K L K P K G S L P P K Y A L E L L T V Y A W E Q G S G M P D F D T A E G F R T V L E L V T  
 Saimiri\_boliviensis D L I R L V K H W Y K E C E R K L K P K G S L P P K Y A L E L L T V Y A W E Q G S G L P D F D T A E G F R T V L E L V T  
 Macaca\_nemestrina D L I R L V K H W Y K E C R K L K P K G S L P P K Y A L E L L T V Y A W E Q G S G A P D F D T A E G F R T V L E L V T  
 Chlorocebus\_sabaeus D L I R L V K H W Y K E C E R K L K P K G S L P P K Y A L E L L T V Y A W E Q G S G A P D F D T A E G F R T V L E L V T  
 Homo\_sapiens D L I R L V K H W Y K E C E R K L K P K G S L P P K Y A L E L L T I Y A W E Q G S G V P D F D T A E G F R T V L E L V T  
 Pongo\_abelii D L I R L V K H W Y K E C E R K L K P K G S L P P K Y A L E L L T I Y A W E Q G S G V P D F D T A E G F R T V L E L V T

1234567890123456789012345678901234567890123456789012345678901234567890

541 5 6 7 8 9 600

-- 2'-5'-oligoadenylate synthetase 1, domain 2/C-terminal --

|                          |                     |                          |              |     |    |
|--------------------------|---------------------|--------------------------|--------------|-----|----|
| Brachyteles_arachnoides  | QYQQLCIFWKVNYNFEDET | VRKFLLSQLQKTRPVILDPAEPTG | DVGGGDRWCWHL | LAK | EA |
| Callithrix_jacchus       | QYQQLCIFWKVNYNFEDET | VRKFLLSQLQKTRPVILDPAEPTG | DVGGGDRWCWHL | LAK | EA |
| Aotus_nancymaae          | QYQQLCIFWKVNYNFEDET | VRKFLLSQLQKTRPVILDPAEPTG | DVGGGDRWCWHL | LAK | EA |
| Cebus_capucinus_imitator | QYQQLCIFWKVNYNFEDET | VRKFLLSQLQKTRPVILDPAEPTG | DVGGGDRWCWHL | LAK | EA |
| Saimiri_boliviensis      | QYQQLCIFWKVNYNFEDET | VRKFLLSQLQKTRPVILDPAEPTG | DVGGGDRWCWHL | LAK | EA |
| Macaca_nemestrina        | QYRQLCIFWKVNYNFEDET | VRKFLLSQLQKTRPVILDPAEPTG | DVGGGDRWCWHL | LAK | EA |
| Chlorocebus_sabaeus      | QYRQLCIFWKVNYNFEDET | VRKFLLSQLQKTRPVILDPAEPTG | DVGGGDRWCWHL | LAK | EA |
| Homo_sapiens             | QYQQLCIFWKVNYNFEDET | VRKFLLSQLQKTRPVILDPAEPTG | DVGGGDRWCWHL | LAK | EA |
| Pongo_abelii             | QYQQLCIFWKVNYNFEDET | IRKFLLSQLQKTRPVILDPAEPTG | DLGGGDRWCWHL | LAK | EA |

12345678901234567890123456789012345678901234567890

601                    1                    2                    3                    4                    5                    6

|                          |       |               |            |
|--------------------------|-------|---------------|------------|
| Brachyteles_arachnoides  | KEWLC | SLCFKDGSGNPI  | SPWKVPVKVI |
| Callithrix_jacchus       | KEWFC | SLCFKDGSGNPI  | PPWKVPVKVI |
| Aotus_nancymaae          | KEWLC | SLCFKDGSGNPI  | PPWKVPVKVI |
| Cebus_capucinus_imitator | KEWLY | SLCFKDGSGNPI  | APWKVPVKVI |
| Saimiri_boliviensis      | KEWLY | SLCFKGGSGNPI  | SPWKVPVKVI |
| Macaca_nemestrina        | KEWSY | SLCFKDETNPI   | SPWKVPVKVI |
| Chlorocebus_sabaeus      | KEWLY | SLCFKDGSGNPI  | SPWKVAVKVI |
| Homo_sapiens             | KEWL  | SSPCFKDGTGNPI | PPWKVPVKVI |
| Pongo_abelii             | KEWL  | SSLCFKDGSGNPI | PPWKVPX--- |

123456789012345678901234

661                    7                    8

PPEF1

|----- IQ motif -----|

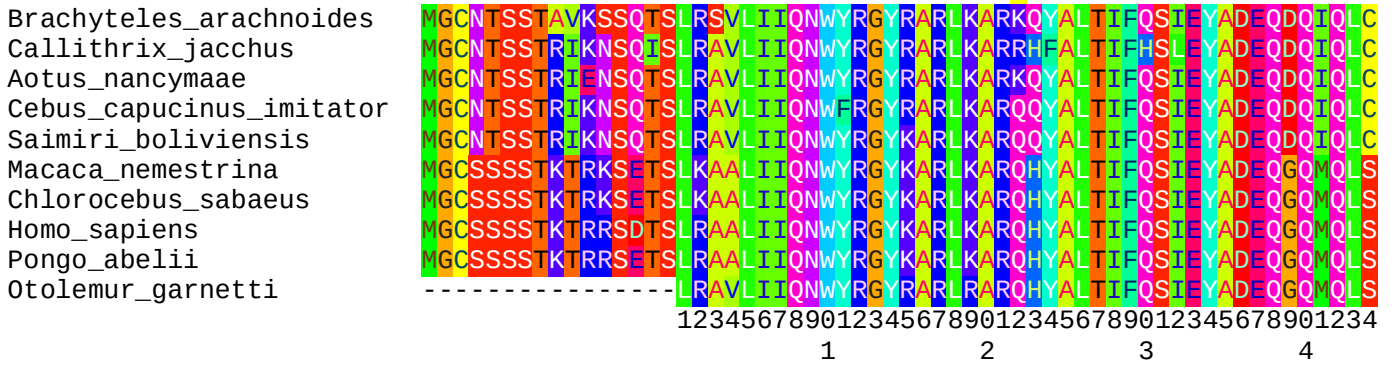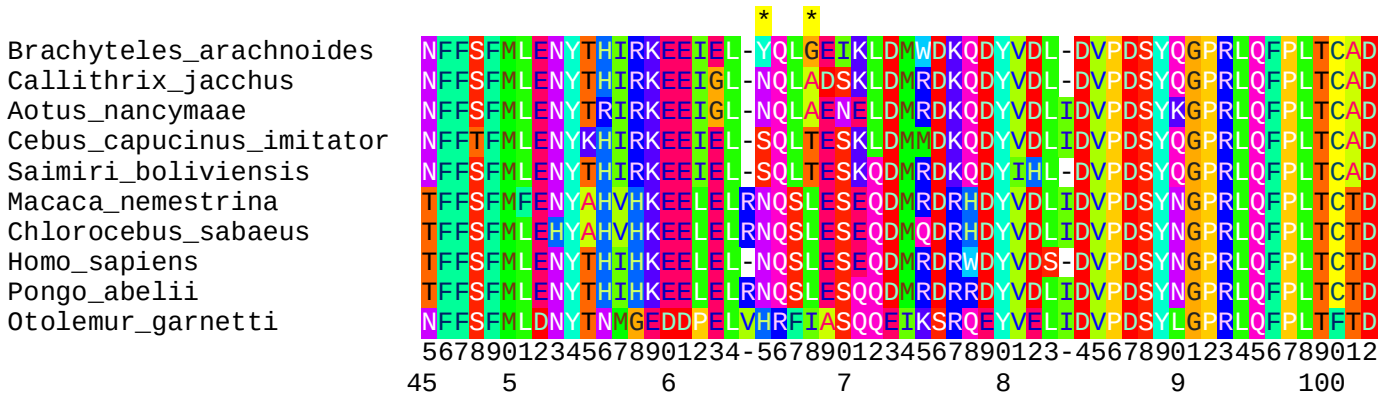

|--- Serine/threonine-specific protein phosphatase -----|

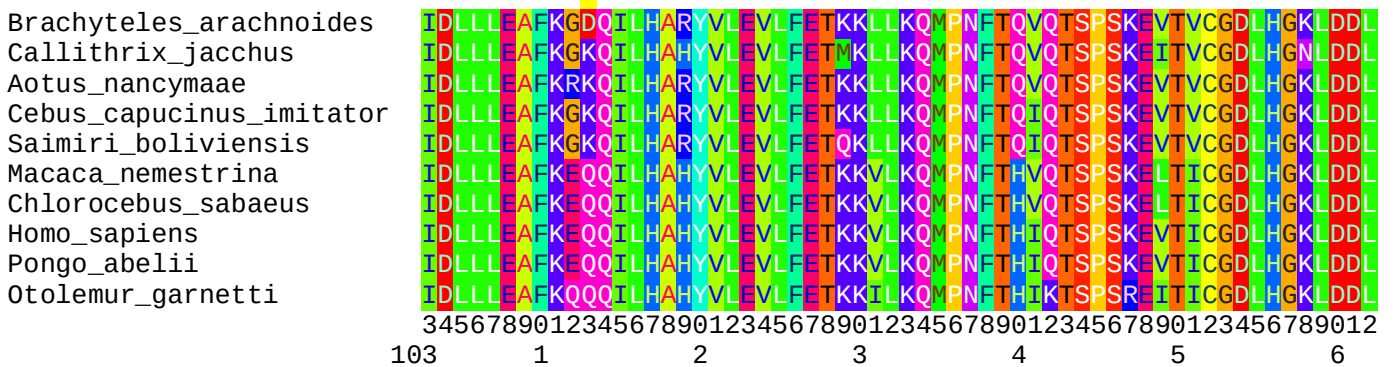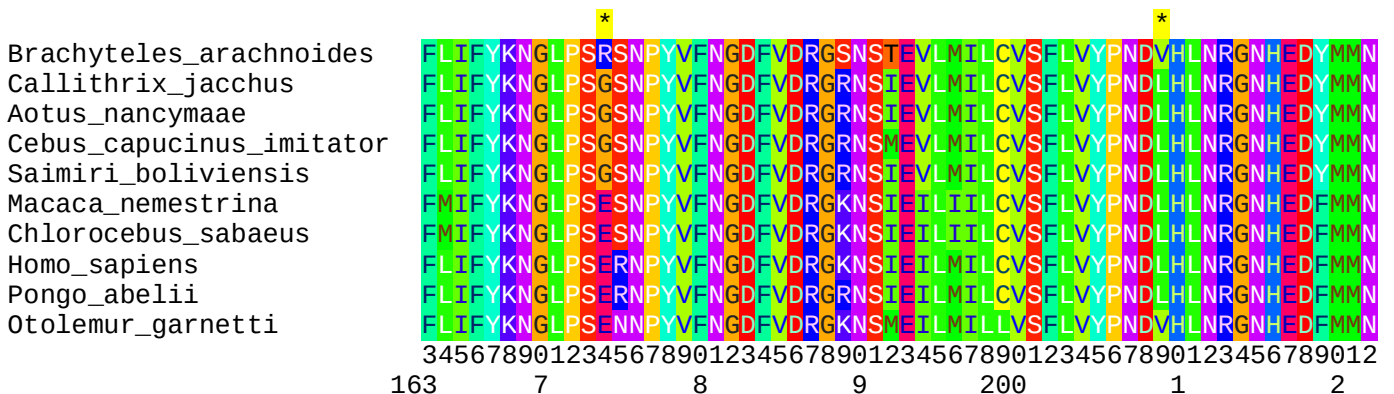

-----

|                          |                           |                                      |
|--------------------------|---------------------------|--------------------------------------|
| Brachyteles_arachnoides  | LRYGFTKEILCKY-KIHGKKILQSL | EEELYTWLPIGTIIDNEILVWHGGISETTDLNLLHR |
| Callithrix_jacchus       | LRYGFTKEILHKY-KIHGKKILQTL | EEFYTWLPIGTIIDNEILVWHGGISETTDLNLLHR  |
| Aotus_nancymaae          | LRYGFTKEILHKY-KIHGKKILQTL | EEFYTWLPIGTIIDNEILVWHGGISETTDLNLLHR  |
| Cebus_capucinus_imitator | LRYQKNKTYSSYLQIHGKKILQTL  | EEELYTWLPIGTIIDNEILVWHGGISETTDLNLLHR |
| Saimiri_boliviensis      | LRYGFTKEILHKY-KVHGKKILQTL | EEELYTWLPIGTIIDNEILVWHGGISETTDLNLLHR |
| Macaca_nemestrina        | LRYGFTKEILHKY-KLHGKRILQI  | LEELYAWLPIGTIVDNEILVIHGGISETTDLNLLHR |
| Chlorocebus_sabaeus      | LRYGFTKEILHKY-KLHGKRILQI  | LEELYAWLPIGTIVDNEILVIHGGISETTDLNLLHC |
| Homo_sapiens             | LRYGFTKEILHKY-KLHGKRILQI  | LEEFYAWLPIGTIVDNEILVIHGGISETTDLNLLHR |
| Pongo_abelii             | LRYGFTKEILHKY-KLHGKRILQI  | LEELYAWLPIGTIVDNEILVIHGGISETTDLNLLHR |
| Otolemur_garnetti        | LRYGFTKEILHKY-KLHGKKILEI  | LEELYTWLPIGTIIDNEILVTHGGISETDNLVLR   |

3456789012345-6789012345678901234567890123456789012345678901

223            3            4            5            6            7            8

-----

|                          |                       |                      |                 |        |
|--------------------------|-----------------------|----------------------|-----------------|--------|
| Brachyteles_arachnoides  | IERNKMKSVLMPPREINKDHN | NSQHSKVGVTISAHGRIKTS | SGFPSEHLPKQEW   | EQVIDI |
| Callithrix_jacchus       | VERNKMKSVLMPPREINKDHS | SSDSKHGNVGVITGAHGRIK | ASGCPSEHLPKHEW  | EQVIDI |
| Aotus_nancymaae          | VERNKMKSVLMPPREIYKDYN | TDSKHSKVDVTISAHGRIK  | TGFLSEHLPKHERE  | EQVIDI |
| Cebus_capucinus_imitator | LERNKMKSVLMPPEINKDYNT | DSKHSKLGVTISAHGRIK   | ASGLSSEHLPKHEW  | EQVIDI |
| Saimiri_boliviensis      | VERNKMKSVLMPPEINKDCN  | NDSSKPSKVGVTISAHGRI  | KASGCPSEHLPKHEW | EQVVDI |
| Macaca_nemestrina        | VERNKMKSVLIPPTETNRDND | TDSKHNVGVTFNAHGRIK   | TNGSPIEHLPKHEW  | EQIIDI |
| Chlorocebus_sabaeus      | IERNKMKSVLIPPNETDRDYD | TDSKHNVGVTFNAHGRIK   | TNRSSIEHLPKHEW  | EQIIDI |
| Homo_sapiens             | VERNKMKSVLIPPTETNRDHD | TDSKHNVGVTFNAHGRIK   | TNGSPTEHLTEHEW  | EQIIDI |
| Pongo_abelii             | VERNKMKSVLIPPTETNRDHD | TDKHNVGVTFNAHGRIK    | TNGSPIEHLTKHEW  | EQIIDI |
| Otolemur_garnetti        | LERNKMKSVLIPPNDVSRDQ  | AVEFEQSRMGISVSASEIFK | -QGETSEHLSRHEW  | EQVIDI |

2345678901234567890123456789012345678901-2345678901234567890

282            9            300            1            2            3            4

-----

|                          |                        |                       |              |       |
|--------------------------|------------------------|-----------------------|--------------|-------|
| Brachyteles_arachnoides  | LWSDPRGKKGCFPNTGRGGGCY | FGPDITSKILNKFQLKMIIRS | HQCKPEGYEICH | DGKVV |
| Callithrix_jacchus       | LWSDPRGKKGCFPNTGRGGGCY | FGPDITSKILNKFQLKMIIRS | HECKPEGYEICH | GKVV  |
| Aotus_nancymaae          | LWSDPRGKKGCFPNTGRGGGCY | FGPDITSKILNKFQLKMIIRS | HECKPEGYEICH | GKVV  |
| Cebus_capucinus_imitator | LWSDPRGKKGCFPNTGRGGGCY | FGPDITSKILNKFQLKMIIRS | HECKPEGYEICH | GKVV  |
| Saimiri_boliviensis      | LWSDPRGKKGCFPNTGRGGGCY | FGPDITSKILNKFQLKMIIRS | HECKPEGYEICH | GKVV  |
| Macaca_nemestrina        | LWSDPRGKNGCFPNTGRGGGCY | FGPDVTSKILNKYQLKMLIRS | HECKPEGYEICH | DGKVV |
| Chlorocebus_sabaeus      | LWSDPRGKNGCFPNTGRGGGCY | FGPDVTSKILNKYQLKMLIRS | HECKPEGYEICH | DGKVV |
| Homo_sapiens             | LWSDPRGKNGCFPNTCRGGGCY | FGPDVTSKILNKYQLKMLIRS | HECKPEGYEICH | DGKVV |
| Pongo_abelii             | LWSDPRGKNGCFPNTGRGGGCY | FGPDVTSKILNKYQLKMLIRS | HECKPEGYEICH | DGKVV |
| Otolemur_garnetti        | LWSDPKGRKGCYPNTRGGGCY  | FGPDVTSKILSKFQLKMLIRS | HECKPEGYEICH | DGKVI |

123456789012345678901234567890123456789012345678901234567890

341            5            6            7            8            9            400

-----

|                          |                       |                      |                        |
|--------------------------|-----------------------|----------------------|------------------------|
| Brachyteles_arachnoides  | TIFSASNYEEEDSNRGAYVKL | CSGNTNPOFFQYQVTDATCF | HPHLQHRVSTIENSAIKILRE  |
| Callithrix_jacchus       | TIFSASNYEEEDSNRGAYVKL | CSGKNPLFFQYQVTDATCF  | HTLQHRVSTVNSAIKILRE    |
| Aotus_nancymaae          | TIFSASNYEEEDSNRGAYVKL | CSGNTNPRFFQYQVTDATCF | HPFHQHRVSTMNSAIKILKE   |
| Cebus_capucinus_imitator | TIFSASNYEEEDSNRGAYVKL | CSGNTNPRFFQYQVTDATCF | QPLHQRVSTMNSAIKILRE    |
| Saimiri_boliviensis      | TIFSASNYEEEDSNRGAYVKL | CSGANPRFFQYQVTDATCF  | QPLHQRVSTMNSAIKILRE    |
| Macaca_nemestrina        | TIFSASNYEEEGSNRGAYIKL | CSGTAPRFFQYQVTKATCF  | QPLRQRVYTMESSAIKILKE   |
| Chlorocebus_sabaeus      | TIFSASNYEEEGSNRGAYIKL | CSGTAPRFFQYQVTKATCF  | QPLRQRVYTMESSAIKILKE   |
| Homo_sapiens             | TIFSASNYEEEGSNRGAYIKL | CSGTTNPRFFQYQVTKATCF | QPLRQRVDTMNSAIKILRE    |
| Pongo_abelii             | TIFSASNYEEEGSNRGAYIKL | CSGTTNPRFFQYQVTKATCF | QPLRQRVHTMNSAIKILRE    |
| Otolemur_garnetti        | TVFSASNYEEEGSNRGAYIRL | CSGMNPRFFQYQVTKATCL  | KLQPLHQRVNIMEISAIRALKE |

123456789012345678901234567890123456789012345678901234567890

401            1            2            3            4            5            6

EF-hand calcium-binding domain 1

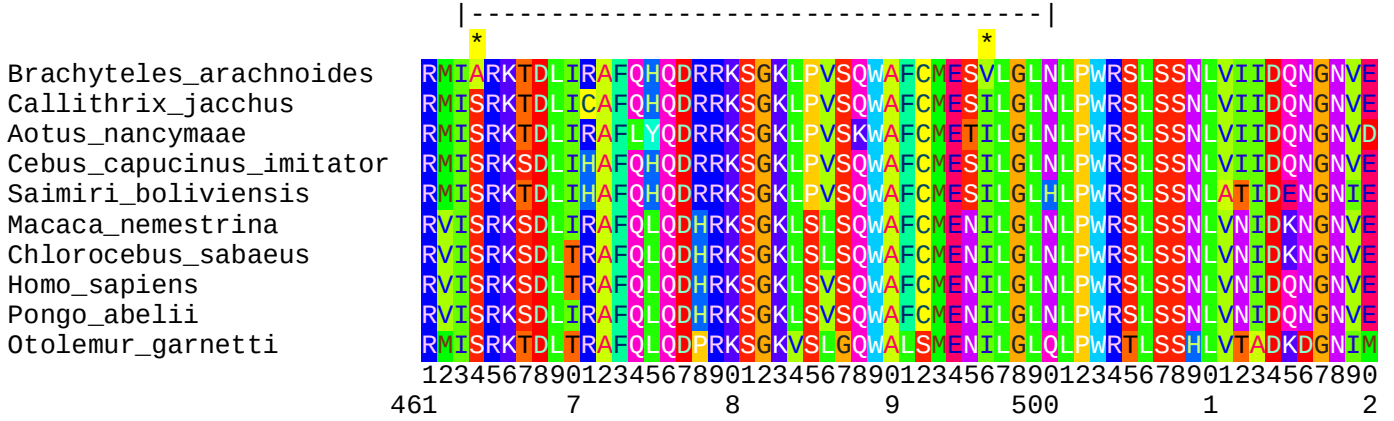

EF-hand calcium-binding domain 2

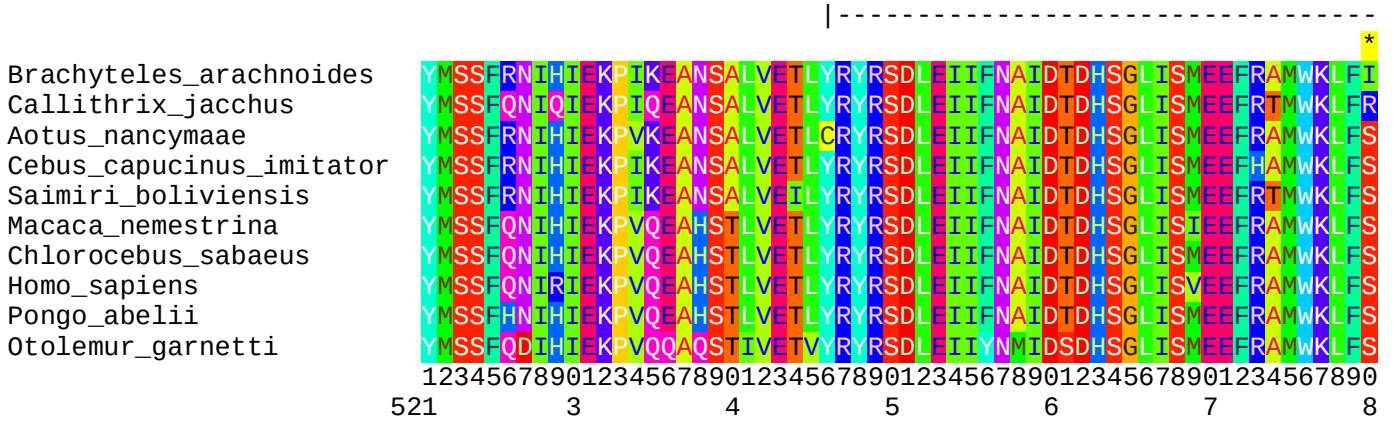

EF-hand calcium-binding domain 3

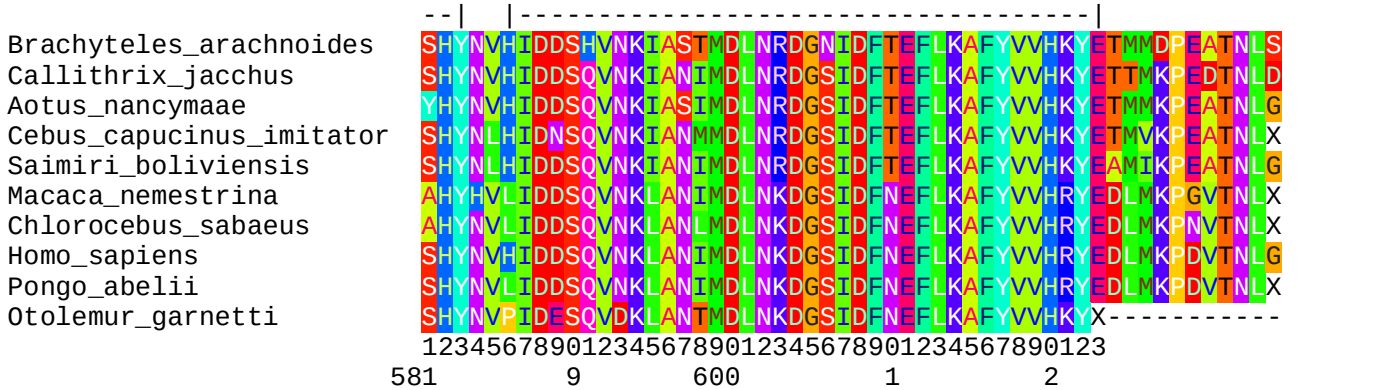



PRPS1

N-terminal domain of ribose phosphate pyrophosphokinase

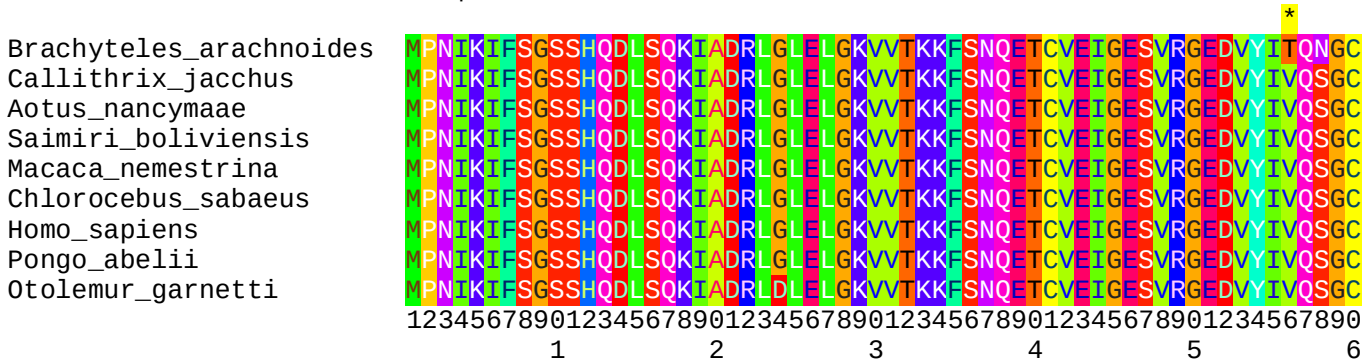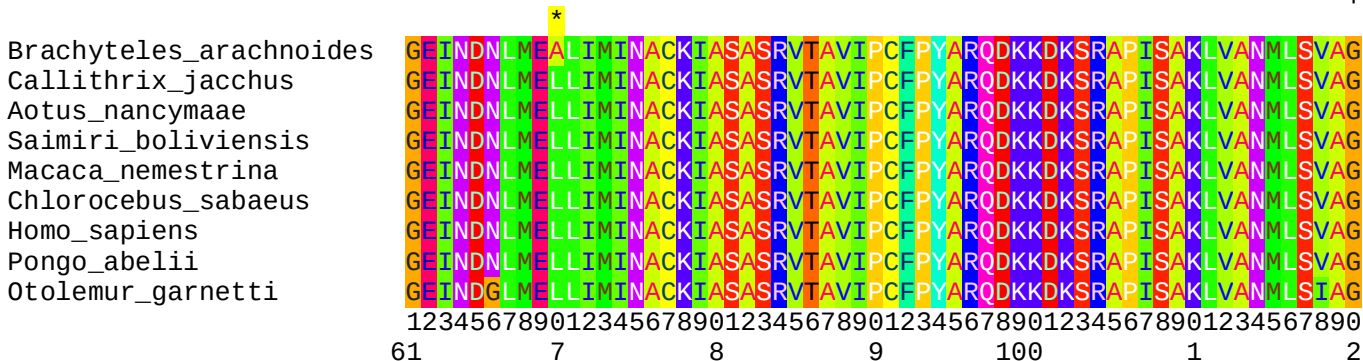

Phosphoribosyltransferase domain

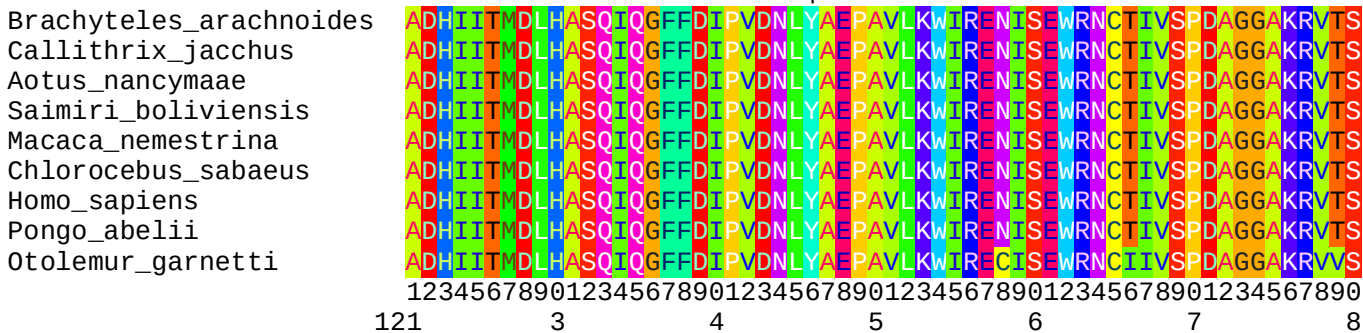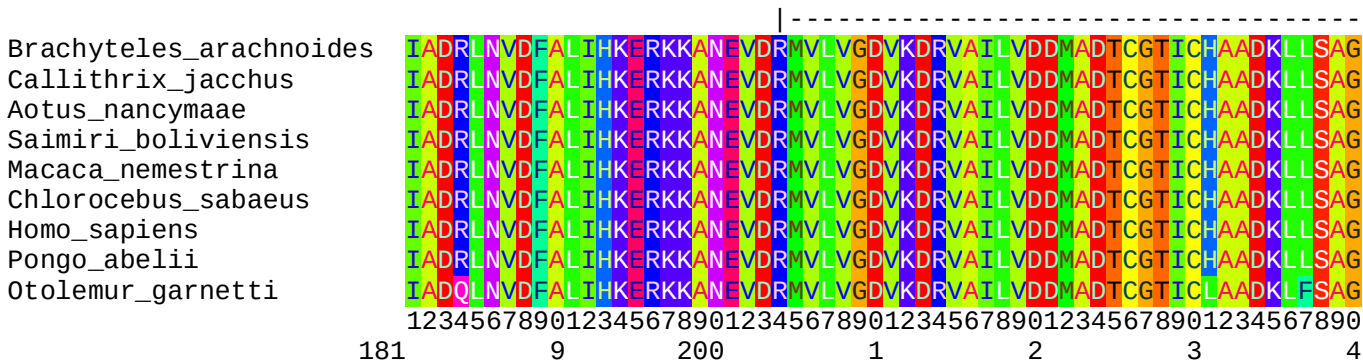

Phosphoribosyl synthetase-associated domain

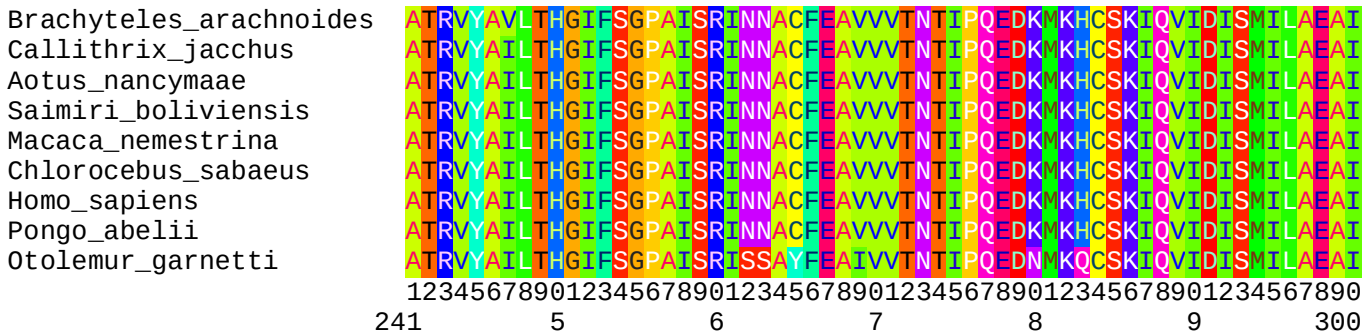

|                         |                    |
|-------------------------|--------------------|
|                         | -----              |
| Brachyteles_arachnoides | RRTHNGESVSYLFSHVPL |
| Callithrix_jacchus      | RRTHNGESVSYLFSHVPL |
| Aotus_nancymae          | RRTHNGESVSYLFSHVPL |
| Saimiri_boliviensis     | RRTHNGESVSYLFSHVPL |
| Macaca_nemestrina       | RRTHNGESVSYLFSHVPL |
| Chlorocebus_sabaeus     | RRTHNGESVSYLFSHVPL |
| Homo_sapiens            | RRTHNGESVSYLFSHVPL |
| Pongo_abelii            | RRTHNGESVSYLFSHVPL |
| Otolemur_garnetti       | RRTHNGESVSYLFSHVPL |
|                         | 123456789012345678 |
| 301                     | 1                  |

RABEP2

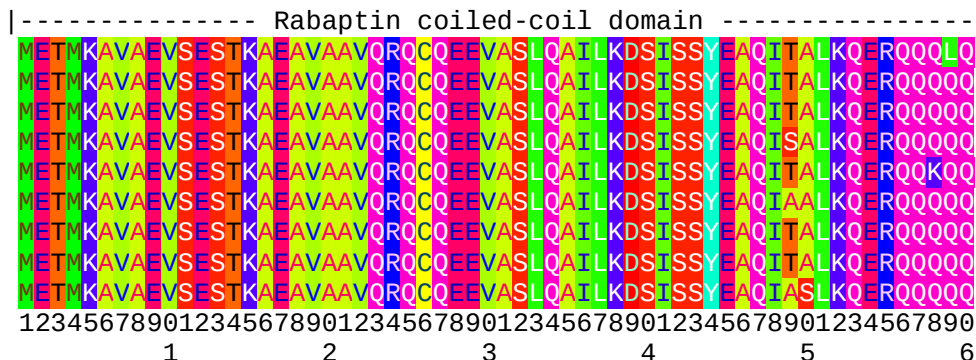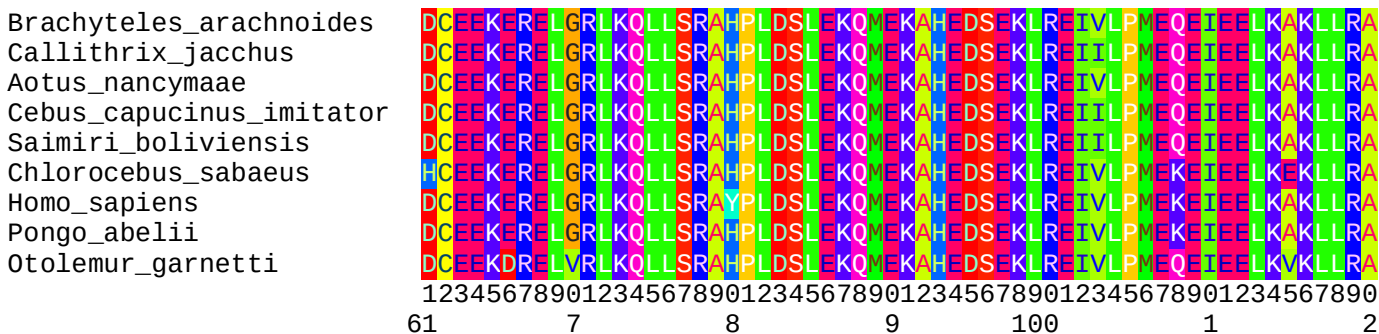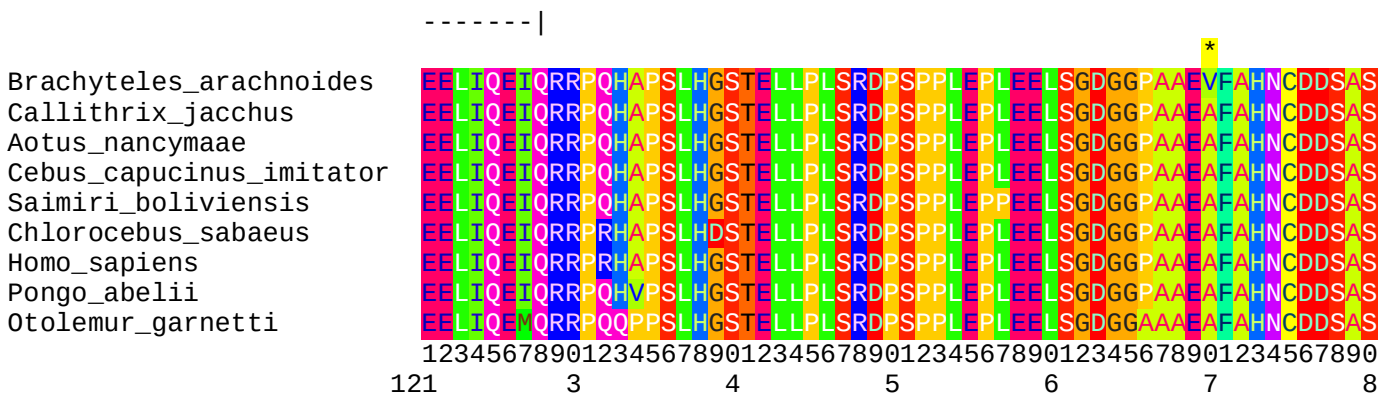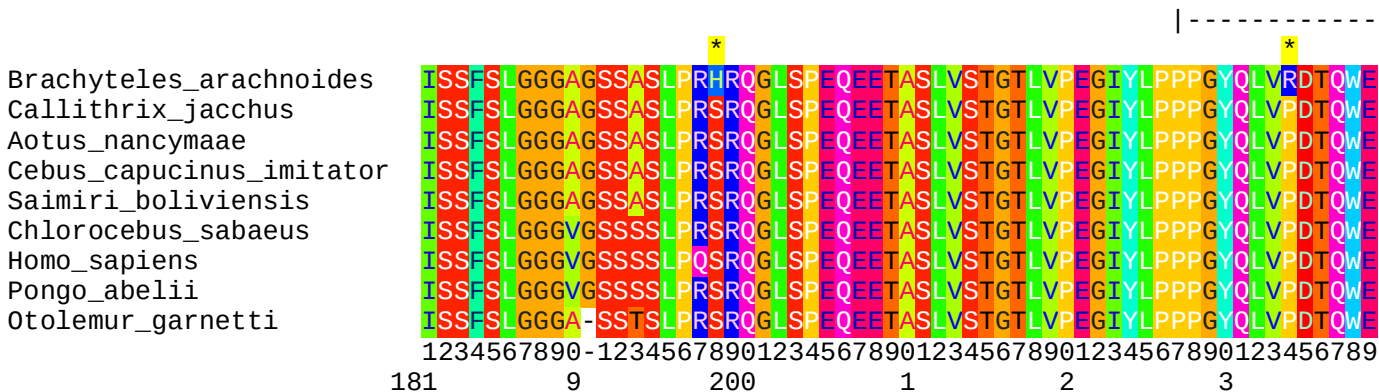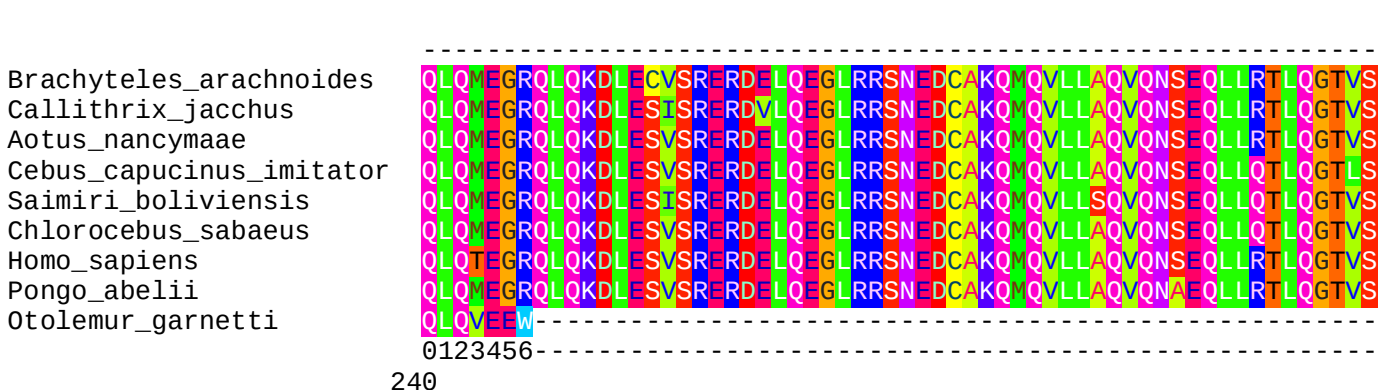

Rabaptin, GTPase-Rab5 binding domain

-----  
 Brachyteles\_arachnoides QAQERVQLQMAELVTTTHKCLHNEVKRLNEENQGLRAEQPPSSAPQGLQQEQGEEESLPSS  
 Callithrix\_jacchus QAQERVQLQMAELVTTTHKCLHNEVKRLNEENQGLRAEQPPSSAPQGLQQERGEEESLPSS  
 Aotus\_nancymaae QAQERVQLQMAELVTTTHKCLHNEVKRLNEENRGLQAEQPPSSAPQGLQQEQGEEESLPSS  
 Cebus\_capucinus\_imitator QAQERVQLQMAELVTTTHKCLHNEVKRLNEENRGLRAEQLPSSAPQGLQQEQGEEESLPSS  
 Saimiri\_boliviensis QAQERVQLQMAELVTTTHKCLHNEVKRLNEENRGLRAEQLPSSAPQGPQQEQGEEESLPSS  
 Chlorocebus\_sabaeus QAQERVQLQMAELVTTTHKCLHHEVKRLNEENQGLRAEQLPSSAPQGLQQEQGEEESLPSS  
 Homo\_sapiens QAQERVQLQMAELVTTTHKCLHHEVKRLNEENQGLRAEQLPSSAPQGSQQEQGEEESLPSS  
 Pongo\_abelii QAQERVQLQMAELVTTTHKCLHHEVKRLNEENQGLRAEQLPSSAPQGPQQEQGEEESLPSS  
 Otolemur\_garnetti ---EQLQVE-AELVTSHKCLRHEVKRLNEENQGLRAEQPPSSAPQGLEQDEGEEESLPTV  
 ---789012-34567890123456789012345678901234567890123456789012

-----  
 Brachyteles\_arachnoides VPQLQQLLRHTQQEARARLQAQEHGAERLRIEIVTLREAL EEETAARASLEGQLRVQREE  
 Callithrix\_jacchus VPQLQQLLRHTQQEAQARLQAQEHGAERLRIEIVTLREAL EEETAARASLEGQLRVQREE  
 Aotus\_nancymaae VSELQQLLRHTQQEARARLQAQEHGAERLRIEIVTLREAL EEETAARASLEGQLRVQREE  
 Cebus\_capucinus\_imitator VLELQQLLRHTQQEAQAQLQAQEHGAERLRIEIVTLREAL EEETAARASLEGQLRVQREE  
 Saimiri\_boliviensis VPQLQQLLRHTQQEAQARLQAQEHGAERLRIEIVTLREAL EEETAARASLEGQLRVQREE  
 Chlorocebus\_sabaeus VPQLQQLLRRTQEARARLQAQEHGAERLRIEIVTLREAL EEETAARASLEGQLRVQRED  
 Homo\_sapiens VPQLQQLLCCTRQEARARLQAQEHGAERLRIEIVTLREAL EEETVARASLEGQLRVQREE  
 Pongo\_abelii VPQLQQLLCRTRQEARAQLQAQEHGAERLRIEIVTLREAL EEETAARASLEGQLRVQREE  
 Otolemur\_garnetti VPQLQQLVRRTRQEARARQAQEHAAERLRIEIVTLREVL EEEKAAARASLDGQLRVQREE  
 345678901234567890123456789012345678901234567890123456789012  
 303 1 2 3 4 5 6

----- |  
 Brachyteles\_arachnoides TEVLEASLCSLRTEVERVQQEQSKAQLPD-LSEQRAKVLRLQAELETSEVQVQDFVRLSQ  
 Callithrix\_jacchus TEVLEASLCSLRTEVERVQQEQSKAQLPD-LSEQRAKVLRLQAELETSEVQVQDFVRLSQ  
 Aotus\_nancymaae TEVLEASLCSLRTEVERVQQEQSKAQLPD-LSEQRAKVLRLQAELETSEVQVQDFVRLSQ  
 Cebus\_capucinus\_imitator TEVLEASLCSLRTEVERVQQEQSKAQLPD-LSEQRAKVLRLQAELETSEVQVQDFVRLSQ  
 Saimiri\_boliviensis TEVLEASLCSLRTEVERVQQEQSKAQLPD-LSEQRAKVLRLQAELETSEVQVQDFVRLSQ  
 Chlorocebus\_sabaeus TEVLEASLCSLRTEMERVQQEESKAQLPD-LSEQRAKVLRLQAELETSEVQVQDFVRLSQ  
 Homo\_sapiens TEVLEASLCSLRTEMERVQQEQSKAQLPD-LSEQRAKVLRLQAELETSEVQVQDFVRLSQ  
 Pongo\_abelii TEVLEASLCSLRTEMERVQQEQSKPQLPDLLSEQRAKVLRLQAELETSEVQVQDFVRLSQ  
 Otolemur\_garnetti TEVLEASLCSLRTEMERMQQEQSKAQLPDLLSEQRAKVLRLQAELETSEVQVQDFVRLSQ  
 34567890123456789012345678901-234567890123456789012345678901  
 363 7 8 9 400 1 2

ALQVRLERIRQAETLEQVRSIMDEAPLTDIRDIKDT  
 Callithrix\_jacchus ALQVRLERIRQAETLEQVRSIMDEAPLTDIRDIKDT  
 Aotus\_nancymaae ALQVRLERIRQAETLEQVRSIMDEAPLTDIRDIKDT  
 Cebus\_capucinus\_imitator ALQVRLERIRQAETLDQVRSIMDEAPLTDIRDIKDT  
 Saimiri\_boliviensis ALQVRLERIRQAETLEQVRNIMDEAPLTDIRDIKDT  
 Chlorocebus\_sabaeus ALQVRLERIRQAETLEQVRSIMDEAPLTDIRDIKDT  
 Homo\_sapiens ALQVRLERIRQAETLEQVRSIMDEAPLTDVVDIKDT  
 Pongo\_abelii ALQVRLERIRQAETLEQVHSIMDEAPLTDVVDIKDT  
 Otolemur\_garnetti ALQVRLERIRQAETLEQVRSILDEAPPRDVRDIRD  
 234567890123456789012345678901234567  
 422 3 4 5

SLC15A2

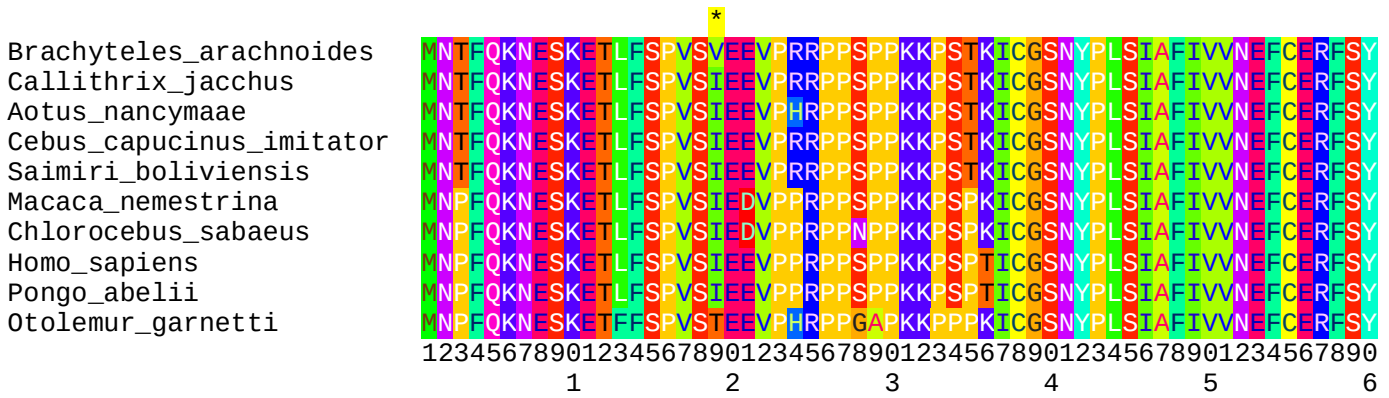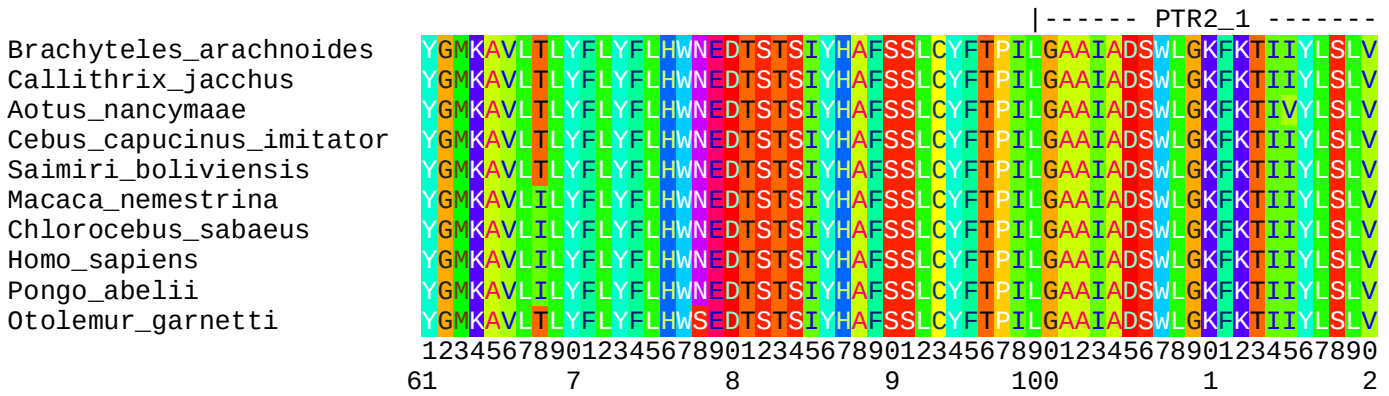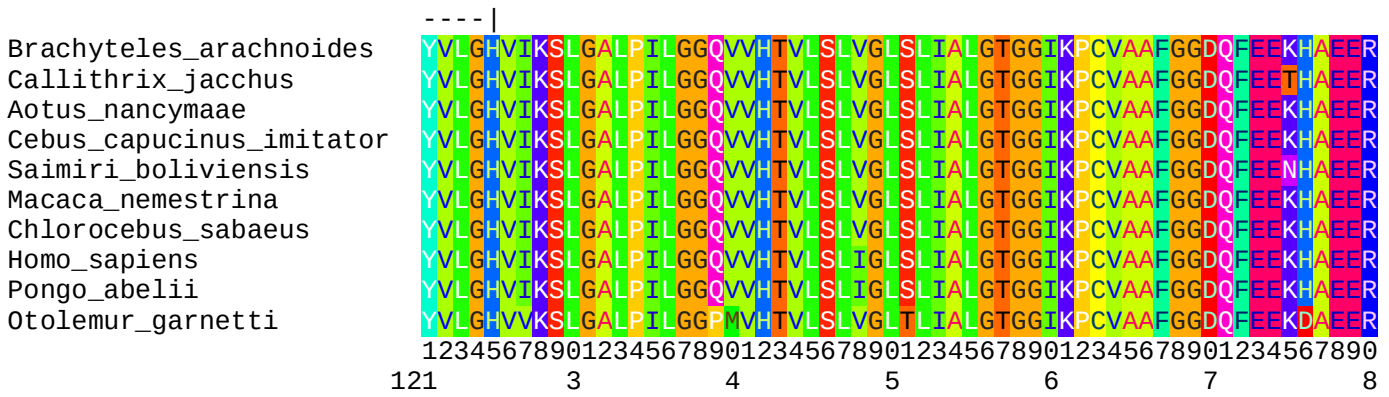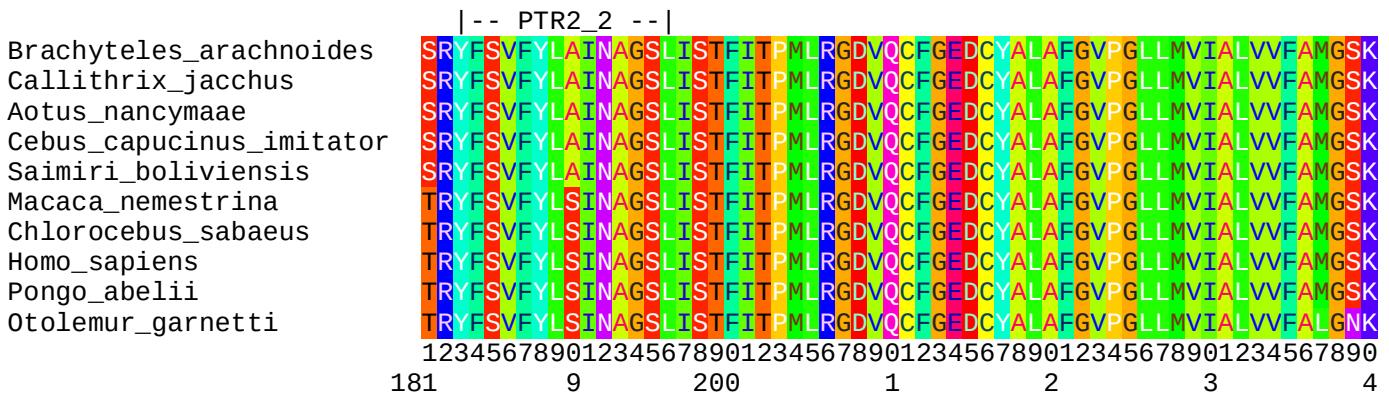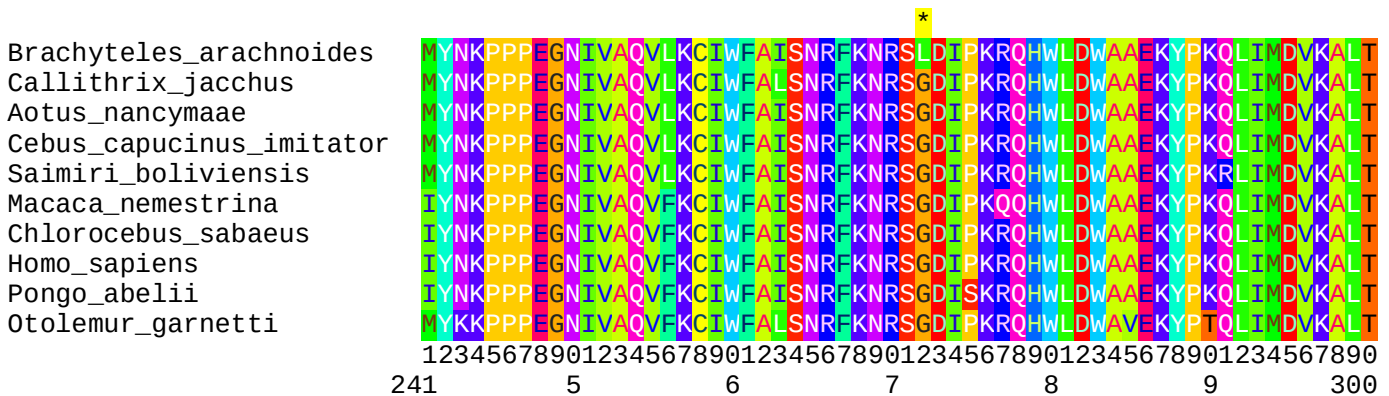

Brachyteles\_arachnoides  
 Callithrix\_jacchus  
 Aotus\_nancymaae  
 Cebus\_capucinus\_imitator  
 Saimiri\_boliviensis  
 Macaca\_nemestrina  
 Chlorocebus\_sabaeus  
 Homo\_sapiens  
 Pongo\_abelii  
 Otolemur\_garnetti

123456789012345678901234567890123456789012345678901234567890  
 301 1 2 3 4 5 6

Brachyteles\_arachnoides  
 Callithrix\_jacchus  
 Aotus\_nancymaae  
 Cebus\_capucinus\_imitator  
 Saimiri\_boliviensis  
 Macaca\_nemestrina  
 Chlorocebus\_sabaeus  
 Homo\_sapiens  
 Pongo\_abelii  
 Otolemur\_garnetti

123456789012345678901234567890123456789012345678901234567890  
 361 7 8 9 400 1 2

Brachyteles\_arachnoides  
 Callithrix\_jacchus  
 Aotus\_nancymaae  
 Cebus\_capucinus\_imitator  
 Saimiri\_boliviensis  
 Macaca\_nemestrina  
 Chlorocebus\_sabaeus  
 Homo\_sapiens  
 Pongo\_abelii  
 Otolemur\_garnetti

123456789012345678901234567890123456789012345678901234567890  
 421 3 4 5 6 7 8

Brachyteles\_arachnoides  
 Callithrix\_jacchus  
 Aotus\_nancymaae  
 Cebus\_capucinus\_imitator  
 Saimiri\_boliviensis  
 Macaca\_nemestrina  
 Chlorocebus\_sabaeus  
 Homo\_sapiens  
 Pongo\_abelii  
 Otolemur\_garnetti

123456789012345678901234567890123456789012345678901234567890  
 481 9 500 1 2 3 4

Brachyteles\_arachnoides  
 Callithrix\_jacchus  
 Aotus\_nancymaae  
 Cebus\_capucinus\_imitator  
 Saimiri\_boliviensis  
 Macaca\_nemestrina  
 Chlorocebus\_sabaeus  
 Homo\_sapiens  
 Pongo\_abelii  
 Otolemur\_garnetti

123456789012345678901234567890123456789012345678901234567890  
 541 5 6 7 8 9

|                          |                                                               |
|--------------------------|---------------------------------------------------------------|
| Brachyteles_arachnoides  | IPANKMSIAWQLPQYALVTAAEVMFSVTGLEFSYSQAPSSMKSVLQAAWLLTVAVGNIIV  |
| Callithrix_jacchus       | IPANKMSIAWQLPQYALVTAAEVMFSVTGLEFSYSQAPSSMKSVLQAAWLLTVAAAGNIIV |
| Aotus_nancymaae          | IPANKMSIAWQLPQYALVTAAEVMFSVTGLEFSYSQAPSSMKSVLQAAWLLTVAVGNIIV  |
| Cebus_capucinus_imitator | IPANKMSIAWQLPQYALVTAAEVMFSVTGLEFSYSQAPSSMKSVLQAAWLLTVAVGNIIV  |
| Saimiri_boliviensis      | IPANKMSIAWQLPQYALVTAAEVMFSVTGLEFSYSQAPSSMKSVLQAAWLLTVAVGNIIV  |
| Macaca_nemestrina        | IPANKMSIAWQLPQYALVTAGEVMFSVTGLEFSYSQAPSSMKSVLQAAWLLTIAVGNIIV  |
| Chlorocebus_sabaeus      | IPANRMSIAWQLPQYALVTAGEVMFSVTGLEFSYSQAPSSMKSVLQAAWLLTIAVGNIIV  |
| Homo_sapiens             | IPANKMSIAWQLPQYALVTAGEVMFSVTGLEFSYSQAPSSMKSVLQAAWLLTIAVGNIIV  |
| Pongo_abelii             | IPANKMSIAWQLPQYALVTAGEVMFSVTGLEFSYSQAPSSMKSVLQAAWLLTIAVGNIIV  |
| Otolemur_garnetti        | IPANKMSIAWQLPQYALVTAGEVMFSVTGLEFSYSQAPSSMKSVLQAAWLLTVAVGNIIV  |
|                          | 01234567890123456789012345678901234567890123456789            |
|                          | 600 1 2 3 4 5                                                 |

|                          |                                                               |
|--------------------------|---------------------------------------------------------------|
| Brachyteles_arachnoides  | LVVAQFSGLVQWAEFILFSCLLLVVCLIFSIMGYNYVPVKTEDRQGPADKQIPHIQGNMI  |
| Callithrix_jacchus       | LVVAQFSGLVQWAEFILFSCLLLVVCLIFSIMGYNYVPVKTEDMQGPADKQIPHIQGNVI  |
| Aotus_nancymaae          | LVVAQFSGLVQWAEFILFSCLLLVVCLIFSIMGYNYVPVKTEDMQGPADKQIPHIQGNMI  |
| Cebus_capucinus_imitator | LVVAQFSGLVQWAEFILFSCLLLVVCLIFSIMGYNYVPVKTEDMQGPADKQIPHIQGNMI  |
| Saimiri_boliviensis      | LVVAQFSGLVQWAEFILFSCLLLVVCLIFSIMGYNYVPVKTEDMQGPADKQIPHIQGNMI  |
| Macaca_nemestrina        | LVVAQFSGLVQWAEFILFSCLLLVICLIFSIMGYYYVPVKTEDMQGPGDKQISHIQGNMI  |
| Chlorocebus_sabaeus      | LVVAQFSGLVQWAEFILFSCLLLVICLIFSIMGYYYVPVKTEDMQGPGDKQIPHIQGNMI  |
| Homo_sapiens             | LVVAQFSGLVQWAEFILFSCLLLVICLIFSIMGYYYVPVKTEDMRGPADKHIPIHIQGNMI |
| Pongo_abelii             | LVVAQFSGLVQWAEFILFSCLLLVICLIFSIMGYYYVPVKTEDMRGPADKQIPHIQGNMI  |
| Otolemur_garnetti        | LVVAQFSGLVQWAEFILFSCLLLVVCLIFSIMGYYYVPVKPEDMQGPADKQIPHIQGNMI  |
|                          | 01234567890123456789012345678901234567890123456789            |
|                          | 660 7 8 9 700 1                                               |

|                          |          |
|--------------------------|----------|
| Brachyteles_arachnoides  | NLETKKTK |
| Callithrix_jacchus       | NLETKKTK |
| Aotus_nancymaae          | NLETKKTK |
| Cebus_capucinus_imitator | NLETKKTK |
| Saimiri_boliviensis      | NLETKKTK |
| Macaca_nemestrina        | NLETKKTK |
| Chlorocebus_sabaeus      | NLETKKTK |
| Homo_sapiens             | KLETKKTK |
| Pongo_abelii             | NLETKKTK |
| Otolemur_garnetti        | NLETKKTK |
|                          | 01234567 |
|                          | 720      |





-----|---- Cytoplasmic ----|-- Transmembrane ---| Lumenal -

Brachyteles\_arachnoides TTMAILLHEIPHEVGDFAILLRAGFDRWSAAKLQLSTALGGLL GAGFAICTQSPK GVEET

Callithrix\_jacchus TTMAILLHEIPHEVGDFAILLRAGFDRWSAAKLQLSTALGGLL GAGFAICTQSPK GVEET

Aotus\_nancymaae TTMAILLHEIPHEVGDFAILLRAGFDRWSAAKLQLSTALGGLL GAGFAICTQSPK GVEET

Cebus\_capucinus\_imitator TTMAILLHEIPHEVGDFAILLRAGFDRWSAAKLQLSTALGGLL GAGFAICTQSPK GVEET

Saimiri\_boliviensis TTMAILLHEIPHEVGDFAILLRAGFDRWSAAKLQLSTALGGLL GAGFAICTQSPK GVEET

Macaca\_nemestrina TTMAILLHEIPHEVGDFAILLRAGFDRWSAAKLQLSTALGGLL GAGFAICTQSPK GVEET

Papio\_anubis TTMAILLHEIPHEVGDFAILLRAGFDRWSAAKLQLSTALGGLL GAGFAICTQSPK GVEET

Chlorocebus\_sabaeus TTMAILLHEIPHEVGDFAILLRAGFDRWSAAKLQLSTALGGLL GAGFAICTQSPK GVEET

Homo\_sapiens TTMAILLHEIPHEVGDFAILLRAGFDRWSAAKLQLSTALGGLL GAGFAICTQSPK GVEET

Pongo\_abelii TTMAILLHEIPHEVGDFAILLRAGFDRWSAAKLQLSTALGGLL GAGFAICTQSPK GVEET

Otolemur\_garnetti TTMAILLHEIPHEVGDFAILLRAGFDRWSAAKLQLSTALGGLL GACFAICTQSPK GVEET

9012345678901234567890123456789012345678901234567890123456789012345678

240 5 6 7 8 9

|-- Transmembrane --|Cytoplasmic|-- Transmembrane ---|

Brachyteles\_arachnoides AA W V L P F T S G G F L Y I A L V N V L P D L L E E E D P W R S L Q Q L L L L C T G I M V M V L F S L F V D

Callithrix\_jacchus AA W V L P F T S G G F L Y I A L V N V L P D L L E E E D P W R S L Q Q L L L L C A G I M V M V L F S L F V D

Aotus\_nancymaae AA W V L P F T S G G F L Y I A L V N V L P D L L E E E D P W R S L Q Q L L L L C A G I M V M V L F S L F V D

Cebus\_capucinus\_imitator VA W V L P F T S G G F L Y I A L V N V L P D L L E E E D P W R S L Q Q L L L L C A G I M V M V L F S L F V D

Saimiri\_boliviensis AA W V L P F T S G G F L Y I A L V N V L P D L L E E E D P W R S L Q Q L L L L C A G I M V M V L F S L F V D

Macaca\_nemestrina AA W V L P F T S G G F L Y I A L V N V L P D L L E E E D P W R S L Q Q L L L L C A G I V M V L F S I F V D

Papio\_anubis AA W V L P F T S G G F L Y I A L V N V L P D L L E E E D P W R S L Q Q L L L L C A G I V M V L F S I F V D

Chlorocebus\_sabaeus AA W V L P F T S G G F L Y I A L V N V L P D L L E E E D P W R S L Q Q L L L L C A G I V M V L F S I F V D

Homo\_sapiens AA W V L P F T S G G F L Y I A L V N V L P D L L E E E D P W R S L Q Q L L L L C A G I V M V L F S L F V D

Pongo\_abelii AA W V L P F T S G G F L Y I A L V N V L P D L L E E E D P W R S L Q Q L L L L C A G I V M V L F S L F V D

Otolemur\_garnetti VA W I L P F T S G G F L Y I A L V N V L P D L L E E D D P W H S L Q Q V I L L C T G I M V M V L F S L F V -

90123456789012345678901234567890123456789012345678901234567890123456789012

500 1 2 3 4 5

SOAT1

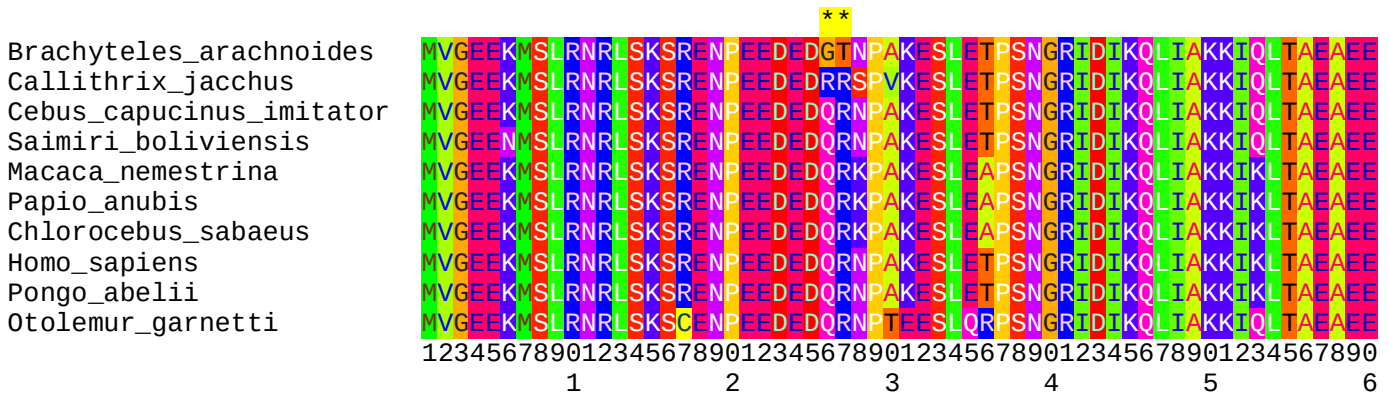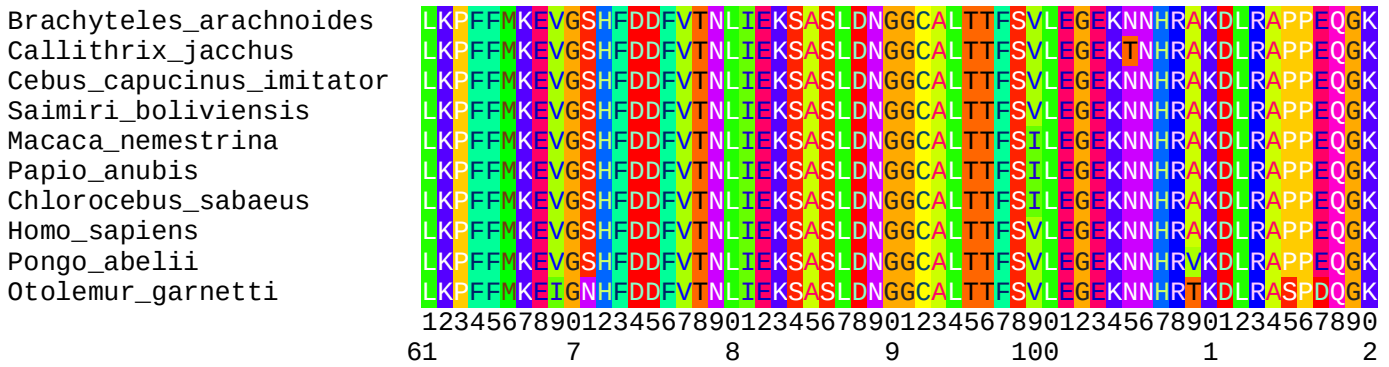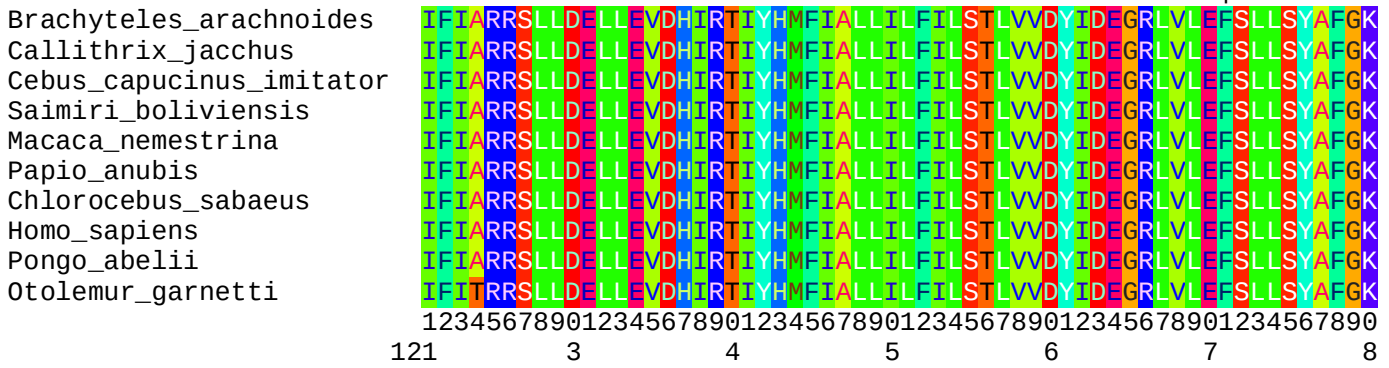

----- MBOAT, membrane-bound O-acyltransferase -----

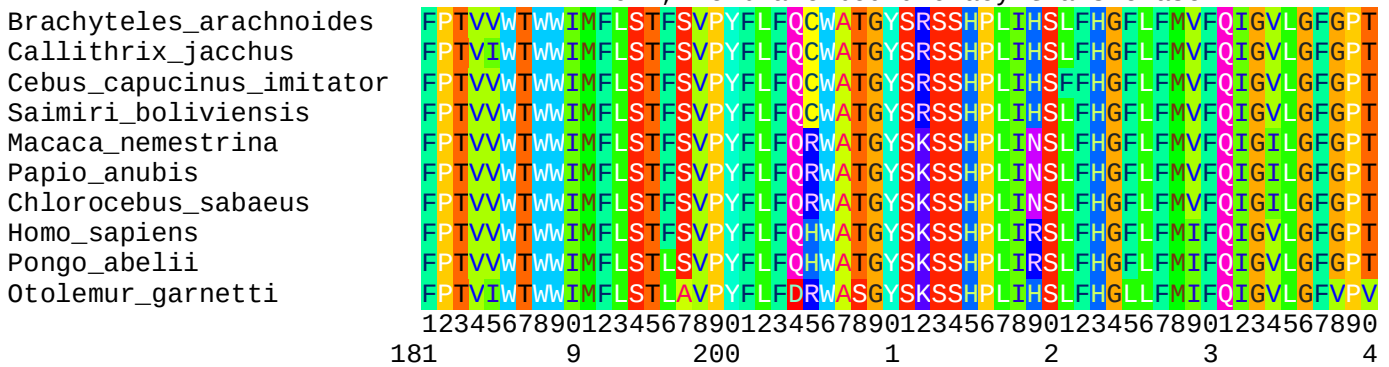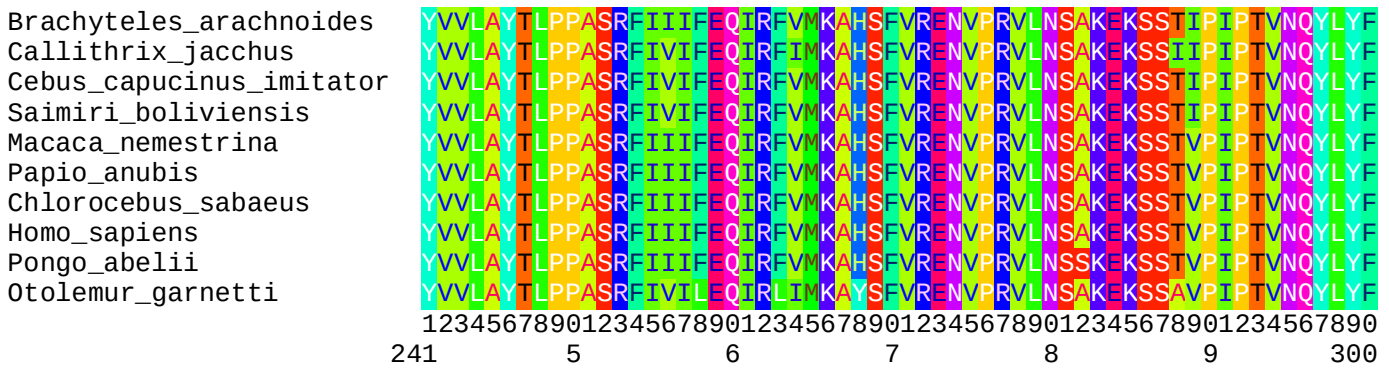



TAF9B

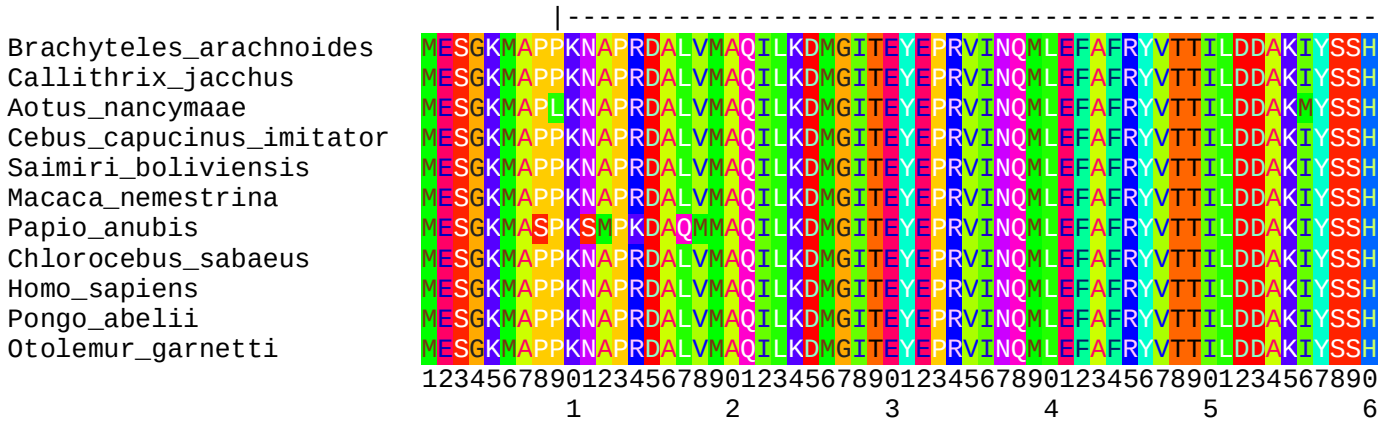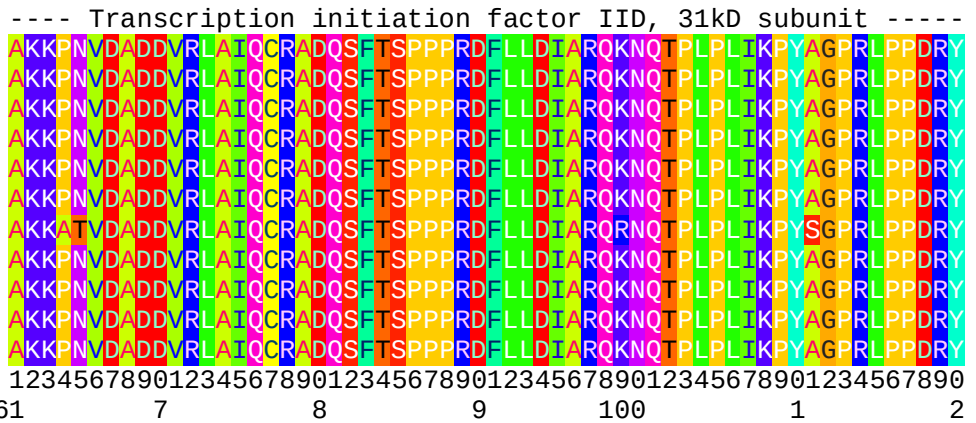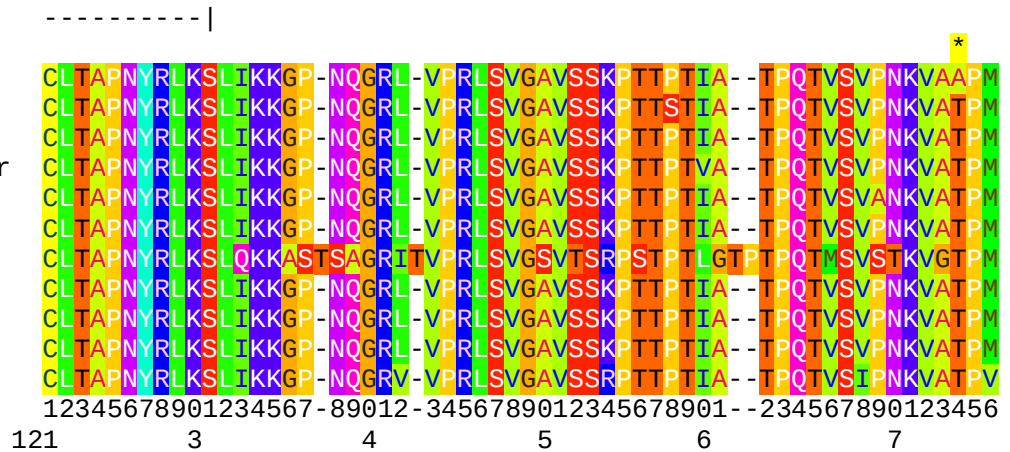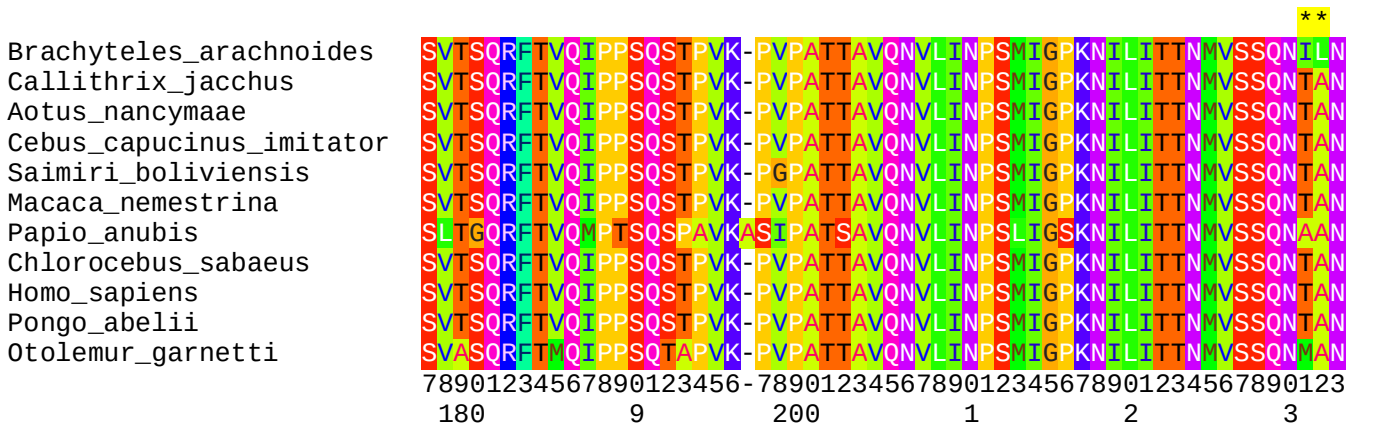

UBXN2B

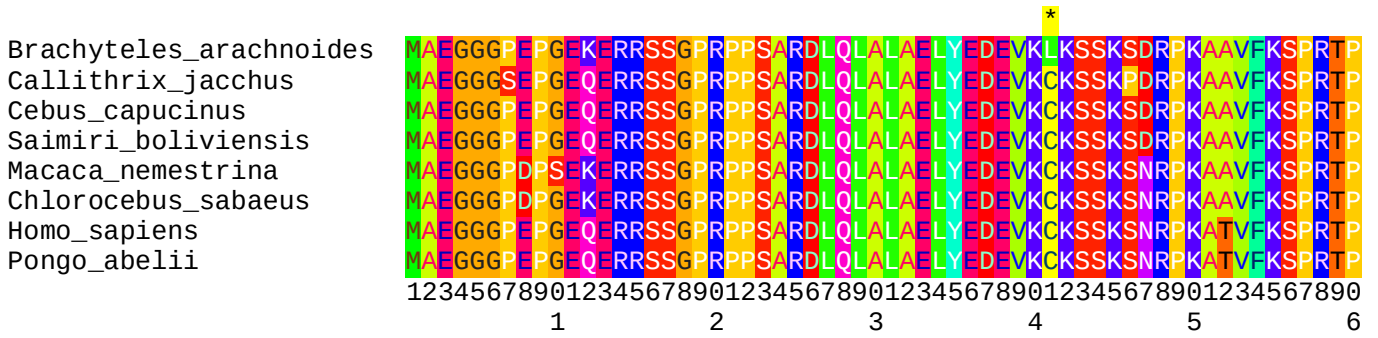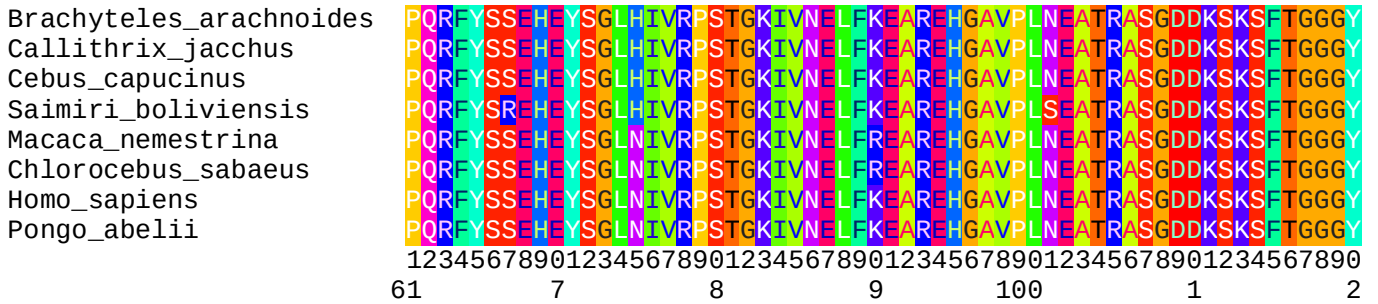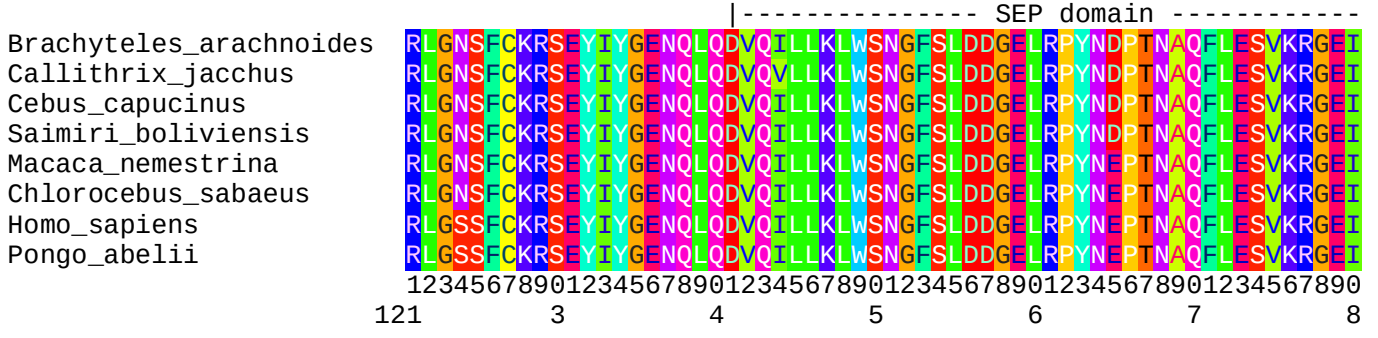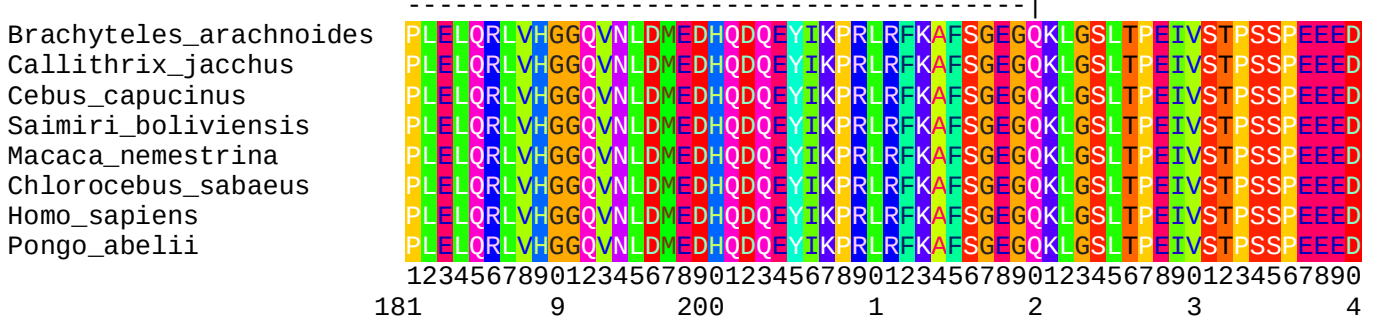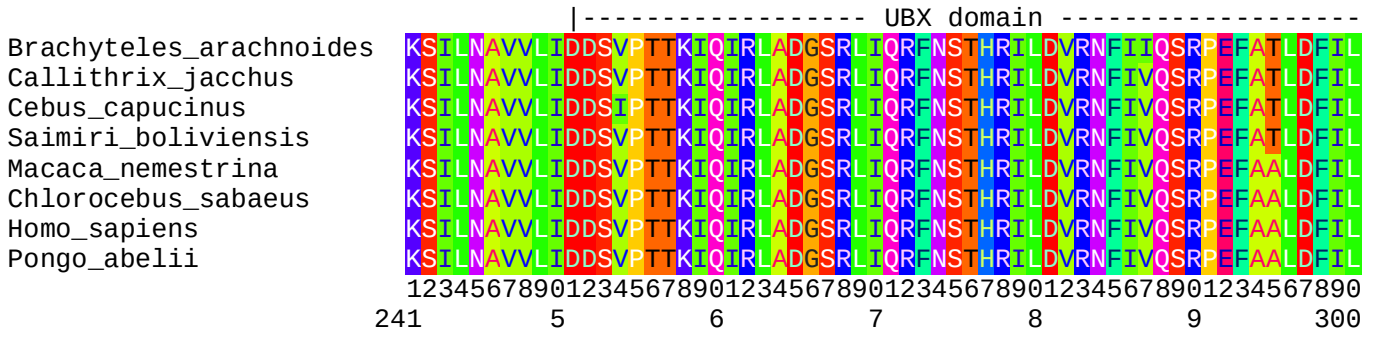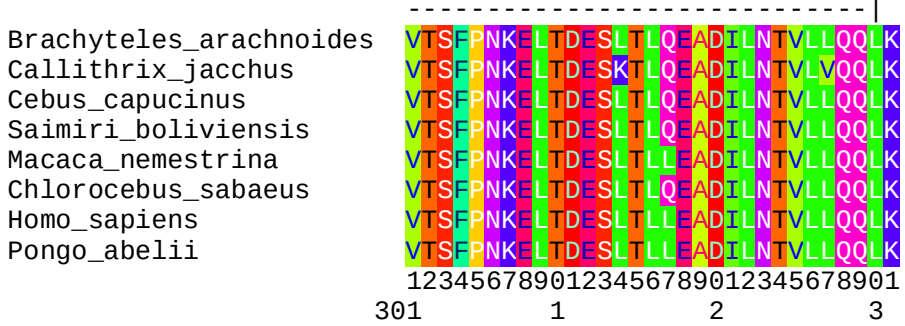

UHRF1BP1L

|----- N-terminal region of Chorein or VPS13 -----

Brachyteles\_arachnoides  
 Callithrix\_jacchus  
 Aotus\_nancymaae  
 Saimiri\_boliviensis  
 Macaca\_nemestrina  
 Chlorocebus\_sabaeus  
 Homo\_sapiens  
 Pongo\_abelii  
 Otolemur\_garnetti

MAGI I K K Q I L K H L S R F T K N L S P D K I N L S T L K G E G E L K N L E L D E E V L Q N M L D L P T W L A I N K  
 MAGI I K K Q I L K H L S R F T K N L S P D K I N L S T L K G E G E L K N L E L D E E V L Q N M L D L P T W L A I N K  
 MAGI I K K Q I L K H L S R F T K N L S P D K I N L S T L K G E G E L K N L E L D E E V L Q N M L D L P T W L A I N K  
 MAGI I K K Q I L K H L S R F T K N L S P D K I N L S T L K G E G E L K N L E L D E E V L Q N M L D L P T W L A I N K  
 MAGI I K K Q I L K H L S R F T K N L S P D K I N L S T L K G E G E L K N L E L D E E V L Q N M L D L P T W L A I N K  
 MAGI I K K Q I L K H L S R F T K N L S P D K I N L S T L K G E G E L K N L E L D E E V L Q N M L D L P T W L A I N K  
 MAGI I K K Q I L K H L S R F T K N L S P D K I N L S T L K G E G E L K N L E L D E E V L Q N M L D L P T W L A I N K  
 MAGI I K K Q I L K H L S R F T K N L S P D K I N L S T L K G E G E L K N L E L D E E V L Q N M L D L P T W L A I N K  
 MAGI I K K Q I L K H L S R F T K N L S P D K I N L S T L K G E G E L K N L E L D E E V L Q N M L D L P T W L A I N K

1234567890123456789012345678901234567890123456789012345678901234567890

1 2 3 4 5 6

Brachyteles\_arachnoides  
 Callithrix\_jacchus  
 Aotus\_nancymaae  
 Saimiri\_boliviensis  
 Macaca\_nemestrina  
 Chlorocebus\_sabaeus  
 Homo\_sapiens  
 Pongo\_abelii  
 Otolemur\_garnetti

V F C N K A S I R I P W T K L K T H P I C L S L D K V I M E M S T C E E P R S P N G P S P I A T A S G Q S E Y G F A E K  
 V F C N K A S I R I P W T K L K T H P I C L S L D K V I M E M S T C E E P R I P N G P S P I A T A S G Q S E Y G F A E K  
 V F C N K A S I R I P W T K L K T H P I C L S L D K V I M E M S T C E E P R S P N G P S P I A T A S G Q S E Y G F A E K  
 V F C N K A S I R I P W T K L K T H P I C L S L D K V I M E M S T C E E P R S P N G P S P I A T A S G Q S E Y G F A E K  
 V F C N K A S I R I P W T K L K T H P I C L S L D K V I M E M S T C E E P R S P N G P S P I A T A S G Q S E Y S F A E K  
 V F C N K A S I R I P W T K L K T H P I C L S L D K V I M E M S T C E E P R S P N G P S P I A T A S G Q S E Y S F A E K  
 V F C N K A S I R I P W T K L K T H P I C L S L D K V I M E M S T C E E P R S P N G P S P I A T A S G Q S E Y G F A E K  
 V F C N K A S I R I P W T K L K T H P I C L S L D K V I M E M S T C E E P R S P N G P S P I A T A S G Q S E Y G F A E K  
 V F C N K A S I R I P W T K L K T H P I C L S L D K V I M E M S T C E E P R P P N G P S P I A T A S G Q S E Y G F A E K

1234567890123456789012345678901234567890123456789012345678901234567890

61 7 8 9 100 1 2

Brachyteles\_arachnoides  
 Callithrix\_jacchus  
 Aotus\_nancymaae  
 Saimiri\_boliviensis  
 Macaca\_nemestrina  
 Chlorocebus\_sabaeus  
 Homo\_sapiens  
 Pongo\_abelii  
 Otolemur\_garnetti

V V E G I T V S V N S I V I R I G A K A F N A S F E L S Q L R I Y S V N A H W E H G D L R F T R I Q D P Q R G E V L T F  
 V V E G I T V S V N S I V I R I G A K A F N A S F E L S Q L R I Y S V N A H W E H G D L R F T R I Q D P Q R G E V L T F  
 V V E G I T V S V N S I V I R I G A K A F N A S F E L S Q L R I Y S V N A H W E H G D L R F T R I Q D P Q R G E V L T F  
 V V E G I T V S V N S I V I R I G A K A F N A S F E L S Q L R I Y S V N A H W E H G D L R F T R I Q D P Q R G E V L T F  
 V V E G I T V S V N S I V I R I G A K A F N A S F E L S Q L R I Y S V N A H W E H G D L R F T R I Q D P Q R G E V L T F  
 V V E G I T V S V N S I V I R I G A K A F N A S F E L S Q L R I Y S V N A H W E H G D L R F T R I Q D P Q R G E V L T F  
 V V E G I S V S V N S I V I R I G A K A F N A S F E L S Q L R I Y S V N A H W E H G D L R F T R I Q D P Q R G E V L T F  
 V V E G I T V S V N S I V I R I G A K A F N A S F E L S Q L R I Y S V N A K W E H G D L R F T R I Q D P Q R G E V L T F

1234567890123456789012345678901234567890123456789012345678901234567890

121 3 4 5 6 7 8

Brachyteles\_arachnoides  
 Callithrix\_jacchus  
 Aotus\_nancymaae  
 Saimiri\_boliviensis  
 Macaca\_nemestrina  
 Chlorocebus\_sabaeus  
 Homo\_sapiens  
 Pongo\_abelii  
 Otolemur\_garnetti

K E I N W Q M I R I E A D A T Q S S H L E I M C A P V R L I T N Q S K I R V T L K R R L K D C N V I A T K L V L I L D D  
 K E I N W Q M I R I E A D A T Q S S H L E I M C A P V R L I T N Q S K I R V T L K R R L K D C N V I A T K L V L I L D D  
 K E I N W Q M I R I E A D A T Q S S H L E I M C A P V R L I T N Q S K I R V T L K R R L K D C N V I A T K L V L I L D D  
 K E I N W Q M I R I E A D A T Q S S H L E I M C A P V R L I T N Q S K I R V T L K R R L K D C N V I A T K L V L I L D D  
 K E I N W Q M I R I E A D A T Q S S H L E I M C A P V R L I T N Q S K I R V T L K R R L K D C N V I A T K L V L I L D D  
 K E I N W Q M I R I E A D A T Q S S H L E I M C A P V R L I T N Q S K I R V T L K R R L K D C N V I A T K L V L I L D D  
 K E I N W Q M I R I E A D A T Q S S H L E I M C A P V R L I T N Q S K I R V T L K R R L K D C N V I A T K L V L I L D D  
 K E I N W Q M I R I E A D A T Q S S H L E I M C A P V R L I T N Q S K I R V T L K R R L K D C N V I A T K L V L I L D D

1234567890123456789012345678901234567890123456789012345678901234567890

181 9 200 1 2 3 4

Brachyteles\_arachnoides  
 Callithrix\_jacchus  
 Aotus\_nancymaae  
 Saimiri\_boliviensis  
 Macaca\_nemestrina  
 Chlorocebus\_sabaeus  
 Homo\_sapiens  
 Pongo\_abelii  
 Otolemur\_garnetti

L L W V L T D S Q L K A M V Q Y A K S L S E A I E K S T E Q R K S M A P E P T Q S S T V V T S A Q Q V K T T Q T S N A P  
 L L W V L T D S Q L K A M V Q Y A K S L S E A I E K S T E Q R K S M A P E P T Q S S T V V A S A Q Q V K T T Q T S N A P  
 L L W V L T D S Q L K A M V Q Y A K S L S E A I E K S T E Q R K S M A P E P T Q S S T V V A S A Q E V K T T Q T S N A P  
 L L W V L T D S Q L K A M V Q Y A K S L S E A I E K S T E Q R K S M A P E P T Q S S T V V A S A Q Q V K T T Q T S N A P  
 L L W V L T D S Q L K A M V Q Y A K S L S E A I E K S T E Q R K S M A P E P T Q S S T V V A S A Q Q V K T T Q T S N A P  
 L L W V L T D S Q L K A M V Q Y A K S L S E A I E K S T E Q R K S M A P E P T Q S S T V V A S A Q Q V K T T Q T S N A P  
 L L W V L T D S Q L K A M V Q Y A K S L S E A I E K S T E Q R K S M A P E P T Q S S T V V A S A Q Q V K T T Q T S N A P  
 L L W V L T D S Q L K A M V Q Y A K S L S E A I E K S T E Q R K S M A P E P T Q S S T V V P S T Q Q V K T P Q T S N V P

1234567890123456789012345678901234567890123456789012345678901234567890

241 5 6 7 8 9 300



Brachyteles\_arachnoides  
 Callithrix\_jacchus  
 Aotus\_nancymaae  
 Saimiri\_boliviensis  
 Macaca\_nemestrina  
 Chlorocebus\_sabaeus  
 Homo\_sapiens  
 Pongo\_abelii  
 Otolemur\_garnetti

SIQSSEMIATNTRHCPNCRHSDLEALFQDFKDCDFFSKTYTSFPKSCDNFNLLHPHFQRH  
 SIQSSEMIATNTRHCPNCRHSDLEALFQDFKDCDFFSKTYTSFPKSCDSFNLLHPHFQRH  
 SIQSSEMIATNTRHCPNCRHSDLEALFQDFKDCDFFSKTYTSFPKSCDSFNLLHPHFQRH  
 SIQSSEMIATNTRHCPNCRHSDLEALFQDFKDCDFFSKTYTSFPKSCDSFNLLHPHFQRH  
 SIQSSEMIATNTRHCPNCRHSDLEALFQDFKDCDFFSKTYTSFPKSCDNFNLLHPHFQRH  
 SIQSSEMIATNTRHCPNCRHSDLEALFQDFKDCDFFSKTYTSFPKSCDNFNLLHPHFQRH  
 SIQSSEMIATNTRHCPNCRHSDLEALFQDFKDCDFFSKTYTSFPKSCDNFNLLHPHFQRH  
 SIQSSEMIATNTRHCPNCRHSDLEALFQDFKDCDFFSKTYTSFPKSRDNFNLLHPHFQRH

123456789012345678901234567890123456789012345678901234567890  
 601 1 2 3 4 5 6

Brachyteles\_arachnoides  
 Callithrix\_jacchus  
 Aotus\_nancymaae  
 Saimiri\_boliviensis  
 Macaca\_nemestrina  
 Chlorocebus\_sabaeus  
 Homo\_sapiens  
 Pongo\_abelii  
 Otolemur\_garnetti

AHEQDTKMHEVYKGNITPQLNKNTLKTSAAMDVWAVYFSQFWIDYEGMKSGKGRPI SFVD  
 AHEQDTKMHEVYKGNITPQLNKNTLKTSAAMDVWAVYFSQFWIDYEGMKSGKGRPI SFID  
 AHEQDTKMHEVYKGNITPQLSKNTLKTSAAMDVWAVYFSQFWIDYEGMKSGKGRPI SFVD  
 AHEQDTKMHEVYKGNITPQLNKNTLKTSAAMDVWAVYFSQFWIDYEGMKSGKGRPI SFVD  
 AHEQDTKMHEIYKGNITPQLNKNTLKTSAAMDVWAVYFSQFWIDYEGMKSGKGRPI SFVD  
 AHEQDTKMHEIYKGNITPQLNKNTLKTSAATDVWAVYFSQFWIDYEGMKSGKGRPI SFVD  
 AHEQDTKMHEIYKGNITPQLNKNTLKTSAATDVWAVYFSQFWIDYEGMKSGKGRPI SFVD  
 AHEQDTKMHEIYKGNITPQLNKNTLKTSAATDVWAVYFSQFWIDYEGMKSGKGRPI SFVD  
 AHEQDTKMHEVYKGNITPQLNKNTLKTSAAMDVWAVYFSQFWIDYEGMKSGKERPI NFVD

123456789012345678901234567890123456789012345678901234567890  
 661 7 8 9 700 1 2

Brachyteles\_arachnoides  
 Callithrix\_jacchus  
 Aotus\_nancymaae  
 Saimiri\_boliviensis  
 Macaca\_nemestrina  
 Chlorocebus\_sabaeus  
 Homo\_sapiens  
 Pongo\_abelii  
 Otolemur\_garnetti

SFPLSIWICQPTRYAESQKEPQTWSQVSLNTSQSESSDLAAGRLKRKLLKEYYSTESEPL  
 SFPLSIWICQPTRYAESQKEPQSCNQVSLNTSQSESSDLAAGRLKRKLLKEYYSTESEPL  
 SFPLSIWICQPTRYAESQKEPQTCQVSLNTSHSESSDLAAGRLKRKLLKEYYSTESEPL  
 SFPLSIWICQPTRYAESQKEPQSCNQVSLNTSQSESSDLAAGRLKRKLLKEYYSTESEPL  
 SFPLSIWICQPTRYAESQKEPQSCNQVSLNTSQSESSDLAAGRLKRKLLKEYYSTESEPL  
 SFPLSIWICQPTRYAESQKEPQTCNQVSLNTSQSESSDLAAGRLKRKLLKEYYSTESEPL  
 SFPLSIWICQPTRYAESQKEPQTCNQVSLNTSQSESSDLAAGRLKRKLLKEYYSTESEPL  
 SFPLSIWICQPTRYTESQKELQTCQVSLNTSQSESSDLAAGRLKRKLLKEYYSTESEPL

123456789012345678901234567890123456789012345678901234567890  
 721 3 4 5 6 7 8

Brachyteles\_arachnoides  
 Callithrix\_jacchus  
 Aotus\_nancymaae  
 Saimiri\_boliviensis  
 Macaca\_nemestrina  
 Chlorocebus\_sabaeus  
 Homo\_sapiens  
 Pongo\_abelii  
 Otolemur\_garnetti

TNGGQKP-SSDTFFRFSSSSSEADIHVLVVMHKKVSMQINHYQYLLLLFLHESLILLSEN  
 TNGGQKP-LSDTFFRFSSSSSEADIHVLVVMHKKVSIQINHYQYLLLLFLHESLILLSEN  
 TNGGQKP-SSDTFFRLSSSSSEADIHVLVVMHKKVSMQINHYQYLLLLFLHESLILLSEN  
 TNGGQKP-SSDTFFRFSSSSSEADIHVLVVMHKKVSMQINHYQYLLLLFLHESLILLSEN  
 ANGGQKPSSSDTFFRFSSSSSEADIHVLVVMHKKVSMQINHYQYLLLLLHESLILLSEN  
 ANGGQKP-SSDKFFRFSSSSSEADIHVLVVMHKKVSMQINHYQYLLLLLHESLILLSEN  
 TNGGQKP-SSDTFFRFSSSSSEADIHLLVVMHKKVSMQINHYQYLLLLFLHESLILLSEN  
 TNGGQKPSSSDTFFRFSSSSSEADIHVLVVMHKKVSMQINHYQYLLLLFLHESLILLSEN  
 TNGGQNP-LADTFLRFSSSSSEADIHVLVVMHKKVSLQINHYQYLLLLFLHDSLVLLAEN

1234567-8901234567890123456789012345678901234567890123456789  
 781 9 800 1 2 3

Brachyteles\_arachnoides  
 Callithrix\_jacchus  
 Aotus\_nancymaae  
 Saimiri\_boliviensis  
 Macaca\_nemestrina  
 Chlorocebus\_sabaeus  
 Homo\_sapiens  
 Pongo\_abelii  
 Otolemur\_garnetti

LRKDVEAVTGSPASQTSICIGILLRSAELALLLHPVDQANTLKSPVSESVSPVVPDYLPT  
 LRKDVEAVTGSPASQTSICIGILLRSAELALLLHPVDQANTLKSPVSESVSPVVPDYLPT  
 LRKDVEAVTGSPASQTSICIGILLRSAELALLLHPVDQANTLKSPVSESVSPVVPDYLST  
 LRKDVEAVTGSPASQTSICIGILLRSAELALLLHPVDQANTLKSPVSESVSPVLDYLST  
 LRKDVEAVTGSPASQTSICIGILLRSAELALLLHPVDQANTLKSPVSESVSPVVPDYLPT  
 LRKDVEAVTGSPASQTSICIGILLRSAELALLLHPVDQANTLKSPVSESVSPVVPDYLPT  
 LRKDVEAVTGSPASQTSICIGILLRSAELALLLHPVDQANTLKSPVSESVSPVVPDYLPT  
 LRKDVEAVTGSPASQTSICIGILLRSAELALLLHPVDQANTFKSPVSESVSPVVPDYLPT  
 LRNDVEAVTGNPANQTSVCIGILLRSAEVALLLHPVDQPNRILKSPVSESVSPVVPDYLPT

012345678901234567890123456789012345678901234567890123456789  
 840 5 6 7 8 9



Brachyteles\_arachnoides  
 Callithrix\_jacchus  
 Aotus\_nancymaae  
 Saimiri\_boliviensis  
 Macaca\_nemestrina  
 Chlorocebus\_sabaeus  
 Homo\_sapiens  
 Pongo\_abelii  
 Otolemur\_garnetti

ENGDFLSSK---ISRDMV--RSVTANHMSDNRSMSVDLSHVPLKDPDLLFKSASDTNLQKG  
 ENGDFLSSK---TSRDVM--RSITVNYMSDNRSMSVDLSHVSLKDPDLLFKSASDTNLQKG  
 ENGDFLSSKTKQISRDMVNRIRSVTVNHMSDNRSMSVDLSHVPLKDPDLLFKSASDTNLQKG  
 ENGDFLSSK---ISRDMV--RSVTVNHMSDNRSMSVDLSHVPLKDPDLLFKSASDTNLQKG  
 ENGDFLSSKRKQISRDMVNRIRSVTVNHMSDNRSMSVDLSHVPLKDPDLLFKSASDTNLQKG  
 EDGDFLSSKRKQISRDMVNRIRSVTVNHMSDNRSMSVDLSHVPLKDTLLFKSASDTNLQKG  
 ENGDFLSSK---ISRDMV--RSVTVNHMSDNRSMSVDLSHIVPLKDPDLLFKSASDTNLQKG  
 ENGDFLSSKRKQISRDMVNRIRSVTVNHMSDNRSMSVDLSHVPLKDPDLLFKSASDTNLQKG  
 KNGEVLSSERKEVS-DTNRIRSETVNHMSDNRSMSVDLSHVPLKDPDLLFKSASDTNLQKG

012345678---90-123--4567890123456789012345678901234567890123

900 1 2 3 4 5

Brachyteles\_arachnoides  
 Callithrix\_jacchus  
 Aotus\_nancymaae  
 Saimiri\_boliviensis  
 Macaca\_nemestrina  
 Chlorocebus\_sabaeus  
 Homo\_sapiens  
 Pongo\_abelii  
 Otolemur\_garnetti

ISFMDYLSDKHLGKI SEDESSGLVYKSGSGEMGSETSDKKDSFYTD-SSILNYREDSNML  
 ISFMDYLSDKHLGKI SEDESSGLVYKSSSGEMGSEISDKKDSFYTD-SSILNYRDDS NML  
 ISFMDYLSDKHLGKI SEDESSGLVYKSGSGEMGSETSDKKDSFYTDSSSILNYREDSNML  
 ISFMDYLSDKHLGKI SEDESSGLVYKSGSGEIGSETSDKKDSFYTDSSSILNYREDSNML  
 ISFMDYLSDKHLGKI SEDESSGLVYKSGSGEIGSETSDKKDSFYTDSSSILNYREDSNML  
 VSFMDYLSDKHLGKI SEDESSGLVYKSGSGEIGSETSDKKDSFYTDSSSILNYREDSNML  
 ISFMDYLSDKHLGKI SEDESSGLVYKSGSGEIGSETSDKKDSFYTD-SSILNYREDSNML  
 ISFMDYLSDKHLGKI SEDESSGLVYKSGSGEIGSETSDKKDSFYTDSSSILNYREDSNML  
 ISFLDYLSDKHLGKI SEDESSGLVYKSGSGEIGAGVSDKKNS\*-----DSNIP

456789012345678901234567890123456789012345-----67890

954 6 7 8 9 1000

Brachyteles\_arachnoides  
 Callithrix\_jacchus  
 Aotus\_nancymaae  
 Saimiri\_boliviensis  
 Macaca\_nemestrina  
 Chlorocebus\_sabaeus  
 Homo\_sapiens  
 Pongo\_abelii  
 Otolemur\_garnetti

SFDSGDGNQNIISNSLTSKGNETIQSIFKVEDLLPEAASLSENLEISKEETHAVRTLKSQS  
 SFDNDGNQNILNSLTSKGNETIESIFKAEDLLPETASLSENVEISKEETPAVRTLKSQ  
 SFDSGDGNQNILNSLTSKGNETIELIFKAEDLLTEAASLSENLEISKEETPAVRTLKSQS  
 SFDSGDGNQNILNSLTSKGNETIESIFKAEDLLPEAASLSENLEISKEETPAVRTLKSQS  
 SFDSGDGNQNILSSSLTSKGNETIESIFKAEDLLSEAAASLSENLDISKEETPTVRTLKSQS  
 SFDSGDGNQNILSSSLTSKGNETIESIFKAEDLLPEAASLSENLDISKEETPTVRTLKSQS  
 SFDSGDGNQNILSSTLTSKGNETIESIFKAEDLLPEAASLSENLDISKEETPPVRTLKSQS  
 SFDSGDGNQNILSSSLTSKGNETIESIFKAEDLLPEAASLSENLDISKEETPPVRTLKSQS  
 SVGNDGNQNILPSSLTSKGNETIESIFKAEDLLPEAALVSENLETSKEEAPTLLRTLKSQS

123456789012345678901234567890123456789012345678901234567890

1001 1 2 3 4 5 6

Brachyteles\_arachnoides  
 Callithrix\_jacchus  
 Aotus\_nancymaae  
 Saimiri\_boliviensis  
 Macaca\_nemestrina  
 Chlorocebus\_sabaeus  
 Homo\_sapiens  
 Pongo\_abelii  
 Otolemur\_garnetti

SLSGKPKERYPPNVAPLCVSYKMKRSSSQMSLDTISLDSMILEEQVLES DGSDSHMFLE  
 SLSGKPRERYPPNVAPLCVSYKMKRSSSQMSLDTISLDSMILEEQVLES DGSDSHMFLE  
 SLSGKPKERYPPNVAPLCVSYKMKRSSSQMSLDTISLDSMILEEQVLES DGSDSHMFLE  
 SLSGKPKERYPPNVAPLCVSYKMKRSSSQMSLDTISLDSMILEEQVLES DGSDSHMFLE  
 SLSGKPKERCPPNLAPLCVSYKMKRSSSQMSLDTISLDSMILEEQVLES DGSDSHMFLE  
 SLSGKPKERCPPNLAPLCVSYKMKRSSSQMSLDTISLDSMILEEQVLES DGSDSHMFLE  
 SLSGKPKERCPPNLAPLCVSYKMKRSSSQMSLDTISLDSMILEEQVLES DGSDSHMFLE  
 SLSGKPKERCPPNLAPLCVSYKMKRSSSQMSLDTISLDSMILEEQVLES DGSDSHMFLE  
 SLSGKPKERCPPNLAPPCISYKMKRSSSQMSLDTVSLDSMILEEQVLES DGSDSHVFL

123456789012345678901234567890123456789012345678901234567890

1061 7 8 9 1100 1 2

Brachyteles\_arachnoides  
 Callithrix\_jacchus  
 Aotus\_nancymaae  
 Saimiri\_boliviensis  
 Macaca\_nemestrina  
 Chlorocebus\_sabaeus  
 Homo\_sapiens  
 Pongo\_abelii  
 Otolemur\_garnetti

KGNKKNSTTNYQSTAESVNASANLQNYGETSPDAISTNSEGAQENHDDLMSVVVFKITGV  
 KGNKKNSTTNYQSTAESVNASANLQNYGETSPDAISTNSEGAQENHDDLMSVVVFKITGV  
 KGNKKNSTTNYQSAAESVNASANLQNYGETSPDAISTNSEGAQENHDDLMSVVVFKITGV  
 KGNKKNSTTNYQSTAESVTAGANLQNYGETSPDAISTNSEGAQENHDDLMSVVVFKITGV  
 KGNKKNSTTNYRGTAEVNTGANLQNYGETSPDAISTNSEGVQENHDDLMSVVVFKITGV  
 KGNKKNSTTNYRGTAEVNTGANLQNYGETSPDAISTNSEGVQENHDDLMSVVVFKITGV  
 KGNKKNSTTNYRGTAEVNTAGANLQNYGETSPDAISTNSEGAQENHDDLMSVVVFKITGV  
 KGNKKNSTTNYRGTAEVNTAGANLQNYGETSPDAISTNSEGAQENHDDLMSVVVFKITGV  
 KGNKKNSTANYQSLAESENASTSLQNYGETSPDAISTNSEGAQENHDDLMSVVVFKITGV

123456789012345678901234567890123456789012345678901234567890

1121 3 4 5 6 7 8

Brachyteles\_arachnoides  
 Callithrix\_jacchus  
 Aotus\_nancymaae  
 Saimiri\_boliviensis  
 Macaca\_nemestrina  
 Chlorocebus\_sabaeus  
 Homo\_sapiens  
 Pongo\_abelii  
 Otolemur\_garnetti

\*  
 NGAIDIRGEDTEICLQVNQVTPDQLGNI<sup>\*</sup>SLRHLYLCNRPVGS<sup>\*</sup>DQKAVIHSKSSPEISLRF<sup>\*</sup>E  
 NGEIDIRGEDTEICLQVNQVTPDQLGNI<sup>\*</sup>SLRHLYLCNRPVGS<sup>\*</sup>DQKAVIHSKSSPEISLRF<sup>\*</sup>E  
 NGEIDIRGEDTEICLQVNQVTPDQLGNI<sup>\*</sup>SLRHLYLCNRPVGS<sup>\*</sup>DQKAVIHSKSSPEISLRF<sup>\*</sup>E  
 NGEIDIRGEDTEICLQVNQVTPDQLGNI<sup>\*</sup>SLRHLYLCNRPVGS<sup>\*</sup>DQKAVIHSKSSPEISLRF<sup>\*</sup>E  
 NGEIDIRGEDTEICLQVNQVTPDQLGNI<sup>\*</sup>SLRHLYLCNRPVGS<sup>\*</sup>DQKAVIHSKSSPEISLRF<sup>\*</sup>E  
 NGEIDIRGEDTEICLQVNQVTPDQLGNI<sup>\*</sup>SLRHLYLCNRPVGS<sup>\*</sup>DQKAVIHSKSSPEISLRF<sup>\*</sup>E  
 NGEIDIRGEDTEICLQVNQVTPDQLGNI<sup>\*</sup>SLRHLYLCNRPVGS<sup>\*</sup>DQKAVIHSKSSPEISLRF<sup>\*</sup>E  
 NGEIDIRGEDTEICLQVNQVTPDQLGNI<sup>\*</sup>SLRHLYLCNRPVGS<sup>\*</sup>DQKAVIHSKSSPEISLRF<sup>\*</sup>E  
 NGEIDIRGEDTEICLQVNQVTPDQLGNI<sup>\*</sup>SLRHLYLCNRPVGS<sup>\*</sup>DQKAVIHSKSSPEISLRFV<sup>\*</sup>

12345678901234567890123456789012345678901234567890  
 1181                    9                    1200                    1                    2                    3                    4

Brachyteles\_arachnoides  
 Callithrix\_jacchus  
 Aotus\_nancymaae  
 Saimiri\_boliviensis  
 Macaca\_nemestrina  
 Chlorocebus\_sabaeus  
 Homo\_sapiens  
 Pongo\_abelii  
 Otolemur\_garnetti

SGPGAVIHSLLAEKNGFLQCHIENFST<sup>\*</sup>EFLTSSLLNIQHFL<sup>\*</sup>EDET<sup>\*</sup>VATVMP<sup>\*</sup>QIEV<sup>\*</sup>SNTK  
 SGPGAVIHSLLAEKNGFLQCHIENFST<sup>\*</sup>EFLTSSLLNIQHFL<sup>\*</sup>EDET<sup>\*</sup>VATVMP<sup>\*</sup>QIEV<sup>\*</sup>SNTK  
 SGPGAVIHSLLAEKNGFLQCHIENFST<sup>\*</sup>EFLTSSLLNIQHFL<sup>\*</sup>EDET<sup>\*</sup>VATVMP<sup>\*</sup>QIEV<sup>\*</sup>SNTK  
 SGPGAVIHSLLAEKNGFLQCHIENFST<sup>\*</sup>EFLTSSLLNIQHFL<sup>\*</sup>EDET<sup>\*</sup>VATVMP<sup>\*</sup>QIEV<sup>\*</sup>SNTK  
 SGPGAVIHSLLAEKNGFLQCHIENFST<sup>\*</sup>EFLTSSLLNIQHFL<sup>\*</sup>EDET<sup>\*</sup>VATVMP<sup>\*</sup>QIEV<sup>\*</sup>SNTK  
 SGPGAVIHSLLAEKNGFLQCHIENFST<sup>\*</sup>EFLTSSLLNIQHFL<sup>\*</sup>EDET<sup>\*</sup>VATVMP<sup>\*</sup>QIEV<sup>\*</sup>SNTK  
 SGPGAVIHSLLAEKNGFLQCHIENFST<sup>\*</sup>EFLTSSLLNIQHFL<sup>\*</sup>EDET<sup>\*</sup>VATVMP<sup>\*</sup>QIEV<sup>\*</sup>SNTK  
 SGPGAVIHSLLAEKNGFLQCHIENFST<sup>\*</sup>EFLTSSLLNIQHFL<sup>\*</sup>EDET<sup>\*</sup>VATVMP<sup>\*</sup>QIEV<sup>\*</sup>SNTK  
 SGPGAVIHSLLAEKNGFLQCHIENFST<sup>\*</sup>EFLTSSLLNIQHFL<sup>\*</sup>EDET<sup>\*</sup>VATVMP<sup>\*</sup>QIEV<sup>\*</sup>SNTK  
 SGPGAVIHSLLAEKNGFLQCHVENFST<sup>\*</sup>EFLTSSLLNIQHFL<sup>\*</sup>EDET<sup>\*</sup>VATVMP<sup>\*</sup>QIEV<sup>\*</sup>SNTK

123456789012345678901234567890123456789012345678901234567890  
 1241                    5                    6                    7                    8                    9                    1300

Brachyteles\_arachnoides  
 Callithrix\_jacchus  
 Aotus\_nancymaae  
 Saimiri\_boliviensis  
 Macaca\_nemestrina  
 Chlorocebus\_sabaeus  
 Homo\_sapiens  
 Pongo\_abelii  
 Otolemur\_garnetti

INLKDDSPRSSTV<sup>\*</sup>SL<sup>\*</sup>EPTPVA<sup>\*</sup>VHIDHLW<sup>\*</sup>ERNDDGSFHIR  
 INLKDDSPRSSTV<sup>\*</sup>SL<sup>\*</sup>EPTPVT<sup>\*</sup>VHIDHLW<sup>\*</sup>ERNDDGSFHIR  
 INLKDDSPRSSTV<sup>\*</sup>SL<sup>\*</sup>EPTPVT<sup>\*</sup>VHIDHLW<sup>\*</sup>ERNDDGSFHIR  
 INLKDDSPRSSTV<sup>\*</sup>SL<sup>\*</sup>EPTPI<sup>\*</sup>TIHIDHLW<sup>\*</sup>ERNDDGSFHIR  
 INLKDDSPRSSTV<sup>\*</sup>SL<sup>\*</sup>EPAPVT<sup>\*</sup>VHIDHLW<sup>\*</sup>ERSDDGSFHIR  
 INLKDDSPRSSTV<sup>\*</sup>SL<sup>\*</sup>EPAPVT<sup>\*</sup>VHIDHLW<sup>\*</sup>ERSDDGSFHIR  
 INLKDDSPRSSTV<sup>\*</sup>SL<sup>\*</sup>EPAPVT<sup>\*</sup>VHIDHLW<sup>\*</sup>ERSDDGSFHIR  
 INLKDDSPRSSTV<sup>\*</sup>SL<sup>\*</sup>EPAPVT<sup>\*</sup>VHIDHLW<sup>\*</sup>ERSDDGSFHIR  
 INLKDDSPRSSTV<sup>\*</sup>SL<sup>\*</sup>EPAPVT<sup>\*</sup>VHIDHLW<sup>\*</sup>ERSDDGSFHIR  
 INLKDDSPRS<sup>\*</sup>SAV<sup>\*</sup>SEPT<sup>\*</sup>PVTI<sup>\*</sup>HIDHLW<sup>\*</sup>ERID<sup>\*</sup>DDGSFHIR

12345678901234567890123456789012345678901234567890  
 1301                    1                    2                    3                    4

ZBTB44

|----- BTB/POZ domain -----

Brachyteles\_arachnoides MGVKTFTHSSSSHSQEMLGKLNMLRNDGHFCDITIRVQDKIFRAHKVVLAAACSDFFRTKL  
Aotus\_nancymaae MGVKTFTHSSSSHSQEMLGKLNMLRNDGHFCDITIRVQDKIFRAHKVVLAAACSDFFRTKL  
Cebus\_capucinus MGVKTFTHSSSSHSQEMLGKLNMLRNDGHFCDITIRVQDKIFRAHKVVLAAACSDFFRTKL  
Saimiri\_boliviensis MGVKTFTHSSSSHSQEMLGKLNMLRNDGHFCDITIRVQDKIFRAHKVVLAAACSDFFRTKL  
Macaca\_nemestrina MGVKTFTHSSSSHSQEMLGKLNMLRNDGHFCDITIRVQDKIFRAHKVVLAAACSDFFRTKL  
Papio\_anubis MGVKTFTHSSSSHSQEMLGKLNMLRNDGHFCDITIRVQDKIFRAHKVVLAAACSDFFRTKL  
Homo\_sapiens MGVKTFTHSSSSHSQEMLGKLNMLRNDGHFCDITIRVQDKIFRAHKVVLAAACSDFFRTKL  
Pongo\_abelii MGVKTFTHSSSSHSQEMLGKLNMLRNDGHFCDITIRVQDKIFRAHKVVLAAACSDFFRTKL  
Otolemur\_garnetti MGVKTFTHSSSSHSQEMLGKLNMLRNDGHFCDITIRVQDKIFRAHKVVLAAACSDFFRTKL

123456789012345678901234567890123456789012345678901234567890

1 2 3 4 5 6

Brachyteles\_arachnoides VGQAEDENKNVLDLHHVTVTGFIPLLLEYAYTATLSINTENIIDVLAASYSYMQMFSVASTC  
Aotus\_nancymaae VGQAEDENKNVLDLHHVTVTGFIPLLLEYAYTATLSINTENIIDVLAASYSYMQMFSVASTC  
Cebus\_capucinus VGQAEDENKNVLDLHHVTVTGFIPLLLEYAYTATLSINTENIIDVLAASYSYMQMFSVASTC  
Saimiri\_boliviensis VGQAEDENKNVLDLHHVTVTGFIPLLLEYAYTATLSINTENIIDVLAASYSYMQMFSVASTC  
Macaca\_nemestrina VGQAEDENKNVLDLHHVTVTGFIPLLLEYAYTATLSINTENIIDVLAASYSYMQMFSVASTC  
Papio\_anubis VGQAEDENKNVLDLHHVTVTGFIPLLLEYAYTATLSINTENIIDVLAASYSYMQMFSVASTC  
Homo\_sapiens VGQAEDENKNVLDLHHVTVTGFIPLLLEYAYTATLSINTENIIDVLAASYSYMQMFSVASTC  
Pongo\_abelii VGQAEDENKNVLDLHHVTVTGFIPLLLEYAYTATLSINTENIIDVLAASYSYMQMFSVASTC  
Otolemur\_garnetti VGQAEDENKNVLDLHHVTVTGFIPLLLEYAYTATLSINTENIIDVLAASYSYMQMFSVASTC

123456789012345678901234567890123456789012345678901234567890

61 7 8 9 100 1 2

Brachyteles\_arachnoides SEFMKSSILWNTPN SQPEKGLDAGQENNSNCNFTSRDGSISPVSSSECSVVERTIPVCRES  
Aotus\_nancymaae SEFMKSSILWNTPN SQPEKGLDAGQENNSNCNFTSRDGSISPVSSSECSVVERTIPVCRES  
Cebus\_capucinus SEFMKSSILWNTPN SQPEKGLDAGQENNSNCNFTSRDGSISPVSSSECSVVERTIPVCRES  
Saimiri\_boliviensis SEFMKSSILWNTPN SQPEKGLDAGQENNSNCNFTSRDGSISPVSSSECSVVERTIPVCRES  
Macaca\_nemestrina SEFMKSSILWNTPN SQPEKGLDAGQENNSNCNFTSRDGSISPVSSSECSVVERTIPVCRES  
Papio\_anubis SEFMKSSILWNTPN SQPEKGLDAGQENNSNCNFTSRDGSISPVSSSECSVVERTIPVCRES  
Homo\_sapiens SEFMKSSILWNTPN SQPEKGLDAGQENNSNCNFTSRDGSISPVSSSECSVVERTIPVCRES  
Pongo\_abelii SEFMKSSILWNTPN SQPEKGLDAGQENNSNCNFTSRDGSISPVSSSECSVVERTIPVCRES  
Otolemur\_garnetti SEFMKSSILWNTPN SQPEKGLDAGQENNSNCNFTSRDGSISPVSSSECSVVERTIPVCRES

123456789012345678901234567890123456789012345678901234567890

121 3 4 5 6 7 8

Brachyteles\_arachnoides RRKRKSYIVMSPESPVKCSTQTSSPQVLNSSASYSERNQPVDSLAFPWTFPFGI DRRR  
Aotus\_nancymaae RRKRKSYIVMSPESPVKCSTQTSSPQVLNSSASYSERNQPVDSLAFPWTFPFGI DRRR  
Cebus\_capucinus RRKRKSYIVMSPESPVKCSTQTSSPQVLNSSASYSERNQPVDSLAFPWTFPFGI DRRR  
Saimiri\_boliviensis RRKRKSYIVMSPESPVKCSTQTSSPQVLNSSASYSERNQPVDSLAFPWTFPFGI DRRR  
Macaca\_nemestrina RRKRKSYIVMSPESPVKCSTQTSSPQVLNSSASYSERNQPVDSLAFPWTFPFGI DRRR  
Papio\_anubis RRKRKSYIVMSPESPVKCSTQTSSPQVLNSSASYSERNQPVDSLAFPWTFPFGI DRRR  
Homo\_sapiens RRKRKSYIVMSPESPVKCGTQTSSPQVLNSSASYSERNQPVDSLAFPWTFPFGI DRRR  
Pongo\_abelii RRKRKSYIVMSPESPVKCGTQTSSPQVLNSSASYSERNQPVDSLAFPWTFPFGI DRRR  
Otolemur\_garnetti RRKRKSYIVMSPESPVKCSTQTNSPQVLNSSASYSERNQPVDSLAFPWTFPFGI DRRR

123456789012345678901234567890123456789012345678901234567890

181 9 200 1 2 3 4

Brachyteles\_arachnoides QPEKVKQGENTRTLELPGPSETGRRMTDYVTCESTKTTLLPLGTEEDVRVKVERLSDEEVH  
Aotus\_nancymaae QPEKVKQGENTRTLELPGPSETGRRMTDYVTCESTKTTLLPLGTEEDVRVKVERLSDEEVH  
Cebus\_capucinus QPEKVKQGENTRTLELPGPSETGRRMTDYVTCESTKTTLLPLGTEEDVRVKVERLSDEEVH  
Saimiri\_boliviensis QPEKVKQGENTRTLELPGPSETGRRMTDYVTCESTKTTLLPLGTEEDVRVKVERLSDEEVH  
Macaca\_nemestrina QPEKVKQAENTRTLELPGPSETGRRMADYVTCESTKTTLLPLGTEEDVRVKVERLSDEEVH  
Papio\_anubis QPEKVKQAENTRTLELPGPSETGRRMADYVTCESTKTTLLPLGTEEDVRVKVERLSDEEVH  
Homo\_sapiens QPEKVKQAENTRTLELPGPSETGRRMADYVTCESTKTTLLPLGTEEDVRVKVERLSDEEVH  
Pongo\_abelii QPEKVKQAENTRTLELPGPSEASRRMADYVTCESTKTTLLPLGTEEDVRVKVERLSDEEVH  
Otolemur\_garnetti QPEKVKQAESTRTLELPGPSETGRRMADYVTCESTKTTLLPLGTEEDVRVKVERLSDEEVH

123456789012345678901234567890123456789012345678901234567890

241 5 6 7 8 9 300

Brachyteles\_arachnoides EEVSQPVSASQSSLSDQQTVPGSEQVQEDLLISPQSSSIGSVDEGVTEGLPTLQSTSSTN  
Aotus\_nancymaae EEVSQPVSASQSSLSDQQTVPGSEQVQEDLLISPQSSSIGSVDEGVTEGLPTLQSTSSTN  
Cebus\_capucinus EEVSQPVSASQSSLSDQQTVPGSEQVQEDLLISPQSSSIGSVDEGVTEGLPTLQSTSSTN  
Saimiri\_boliviensis EEVSQPVSASQSSLSDQQTVPGSEQVQEDLLISPQSSSIGSVDEGVTEGLPTLQSTSSTN  
Macaca\_nemestrina EEVSQPVSASQSSLSDQQTVPGSEQVQEDLLISPQSSSIGSVDEGVSEGLPTLQSSSSTA  
Papio\_anubis EEVSQPVSASQSSLSDQQTVPGSEQVQEDLLISPQSSSIGSVDEGVSEGLPTLQSSSSTA  
Homo\_sapiens EEVSQPVSASQSSLSDQQTVPGSEQVQEDLLISPQSSSIGSVDEGVSEGLPTLQSTSSTN  
Pongo\_abelii EEVSQPVSASQSSLSDQQTVPGSEQVQEDLLISPQSSSIGSVDEGVSEGLPTLQSTSSTN  
Otolemur\_garnetti EEVSQPVSASQSSLSDQQTVPGSEQVQEDLLISPQSSSIGSVDEGVTEGLPTLQSTSSTN

123456789012345678901234567890123456789012345678901234567890

301 1 2 3 4 5 6

| Zinc finger C2H2-type

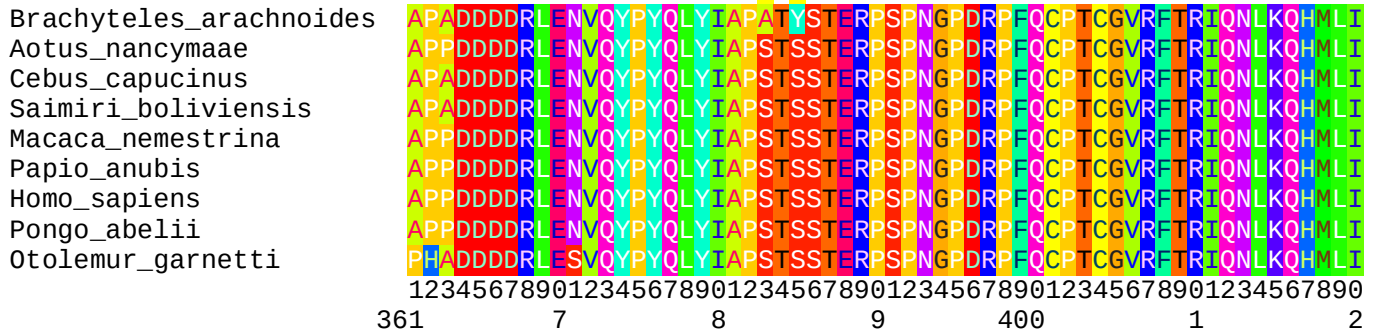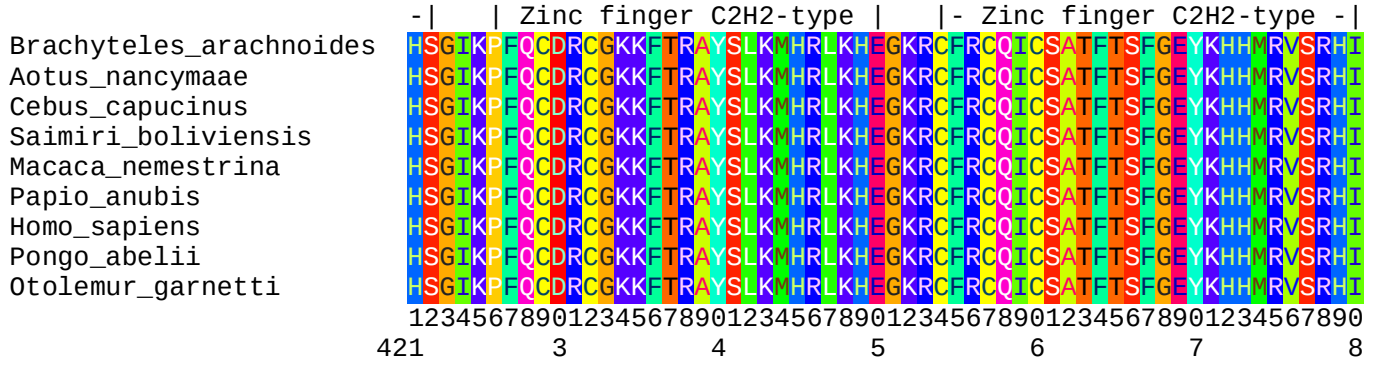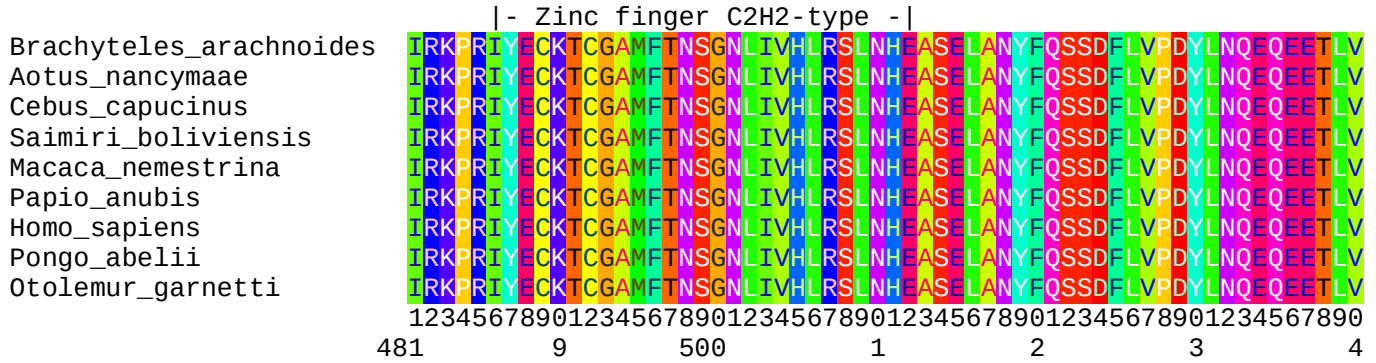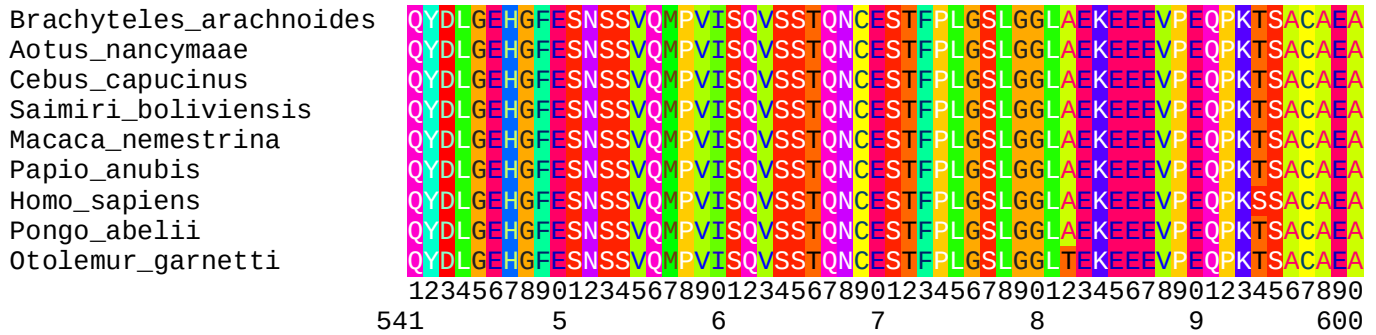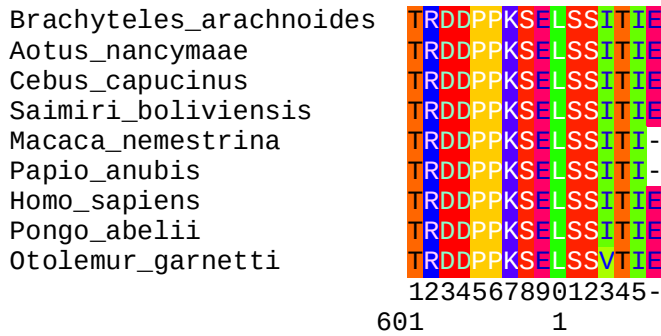

ZSWIM8

Brachyteles\_arachnoides  
 Callithrix\_jacchus  
 Aotus\_nancymaae  
 Cebus\_capucinus\_imitator  
 Saimiri\_boliviensis  
 Macaca\_nemestrina  
 Papio\_anubis  
 Chlorocebus\_sabaeus  
 Homo\_sapiens  
 Pongo\_abelii  
 Otolemur\_garnetti

MELMFAEWEDGERFSFEDSDRFEEDSLCSFISEAESLCQNWRGWRKQSAAGPNSPTGGGGG  
 MELMFAEWEDGERFSFEDSDRFEEDSLCSFISEAESLCQNWRGWRKQSAAGPNSPTGGGGG

123456789012345678901234567890123456789012345678901234567890  
 1 2 3 4 5 6

Brachyteles\_arachnoides  
 Callithrix\_jacchus  
 Aotus\_nancymaae  
 Cebus\_capucinus\_imitator  
 Saimiri\_boliviensis  
 Macaca\_nemestrina  
 Papio\_anubis  
 Chlorocebus\_sabaeus  
 Homo\_sapiens  
 Pongo\_abelii  
 Otolemur\_garnetti

GGSGGTRMRDGLVIPLVELSAKQVAFHIPFEVVEKVYPPVPEQLQLRIAFWSFPENEEDI  
 GGSGGTRMRDGLVIPLVELSAKQVAFHIPFEVVEKVYPPVPEQLQLRIAFWSFPENEEDI

123456789012345678901234567890123456789012345678901234567890  
 61 7 8 9 100 1 2

Brachyteles\_arachnoides  
 Callithrix\_jacchus  
 Aotus\_nancymaae  
 Cebus\_capucinus\_imitator  
 Saimiri\_boliviensis  
 Macaca\_nemestrina  
 Papio\_anubis  
 Chlorocebus\_sabaeus  
 Homo\_sapiens  
 Pongo\_abelii  
 Otolemur\_garnetti

RLYSCLANGSADEFQRGDQLFRMRRAVKDPLQIGFHLSATVVPQMVPPKGAYNVAVMFDR  
 RLYSCLANGSADEFQRGDQLFRMRRAVKDPLQIGFHLSATVVPQMVPPKGAYNVAVMFDR

123456789012345678901234567890123456789012345678901234567890  
 121 3 4 5 6 7 8

--- Zinc finger SWIM-type ---|

Brachyteles\_arachnoides  
 Callithrix\_jacchus  
 Aotus\_nancymaae  
 Cebus\_capucinus\_imitator  
 Saimiri\_boliviensis  
 Macaca\_nemestrina  
 Papio\_anubis  
 Chlorocebus\_sabaeus  
 Homo\_sapiens  
 Pongo\_abelii  
 Otolemur\_garnetti

CRVTSCSCTCGAGAKwCTHVAALCLFRIHNASAVCLRAPVSESLSRLQRDQLQKFAOYLI  
 CRVTSCSCTCGAGAKwCTHVAALCLFRIHNASAVCLRAPVSESLSRLQRDQLQKFAOYLI

123456789012345678901234567890123456789012345678901234567890  
 181 9 200 1 2 3 4

Brachyteles\_arachnoides  
 Callithrix\_jacchus  
 Aotus\_nancymaae  
 Cebus\_capucinus\_imitator  
 Saimiri\_boliviensis  
 Macaca\_nemestrina  
 Papio\_anubis  
 Chlorocebus\_sabaeus  
 Homo\_sapiens  
 Pongo\_abelii  
 Otolemur\_garnetti

SELPQQILPTAQRLLDELLSSQSTAINVCGAPDPTAGPSASDQSTWYLDESTLTDNIKK  
 SELPQQILPTAQRLLDELLSSQSTAINVCGAPDPTAGPSASDQSTWYLDESTLTDNIKK

123456789012345678901234567890123456789012345678901234567890  
 241 5 6 7 8 9 300

Brachyteles\_arachnoides  
 Callithrix\_jacchus  
 Aotus\_nancymaae  
 Cebus\_capucinus\_imitator  
 Saimiri\_boliviensis  
 Macaca\_nemestrina  
 Papio\_anubis  
 Chlorocebus\_sabaeus  
 Homo\_sapiens  
 Pongo\_abelii  
 Otolemur\_garnetti

123456789012345678901234567890123456789012345678901234567890

301 1 2 3 4 5 6

Brachyteles\_arachnoides  
 Callithrix\_jacchus  
 Aotus\_nancymaae  
 Cebus\_capucinus\_imitator  
 Saimiri\_boliviensis  
 Macaca\_nemestrina  
 Papio\_anubis  
 Chlorocebus\_sabaeus  
 Homo\_sapiens  
 Pongo\_abelii  
 Otolemur\_garnetti

123456789012345678901234567890123456789012345678901234567890

361 7 8 9 400 1 2

Brachyteles\_arachnoides  
 Callithrix\_jacchus  
 Aotus\_nancymaae  
 Cebus\_capucinus\_imitator  
 Saimiri\_boliviensis  
 Macaca\_nemestrina  
 Papio\_anubis  
 Chlorocebus\_sabaeus  
 Homo\_sapiens  
 Pongo\_abelii  
 Otolemur\_garnetti

123456789012345678901234567890123456789012345678901234567890

421 3 4 5 6 7 8

Brachyteles\_arachnoides  
 Callithrix\_jacchus  
 Aotus\_nancymaae  
 Cebus\_capucinus\_imitator  
 Saimiri\_boliviensis  
 Macaca\_nemestrina  
 Papio\_anubis  
 Chlorocebus\_sabaeus  
 Homo\_sapiens  
 Pongo\_abelii  
 Otolemur\_garnetti

123456789012345678901234567890123456789012345678901234567890

481 9 500 1 2 3 4

Brachyteles\_arachnoides  
 Callithrix\_jacchus  
 Aotus\_nancymaae  
 Cebus\_capucinus\_imitator  
 Saimiri\_boliviensis  
 Macaca\_nemestrina  
 Papio\_anubis  
 Chlorocebus\_sabaeus  
 Homo\_sapiens  
 Pongo\_abelii  
 Otolemur\_garnetti

123456789012345678901234567890123456789012345678901234567890

541 5 6 7 8 9

Brachyteles\_arachnoides  
 Callithrix\_jacchus  
 Aotus\_nancymae  
 Cebus\_capucinus\_imitator  
 Saimiri\_boliviensis  
 Macaca\_nemestrina  
 Papio\_anubis  
 Chlorocebus\_sabaeus  
 Homo\_sapiens  
 Pongo\_abelii  
 Otolemur\_garnetti

\* \*  
 AGSKRRLSSEDSSLEPDLAEMSLDDSSLALGAEASTFGNFPES-PPPCPPHGGSRGPSTF  
 GSKRRLSSEDSSLEPDLAEMSLDDSSLALGAEASTFGGFPES-PPPCPPHGGSRGPSTF  
 GSKRRLSSEDSSLEPDLAEMSLDDSSLALGAEASTFGGFPES-PPPCPPHGGSRGPSTF  
 GSKRRLSSEDSSLEPDLAEMSLDDSSLALGAEASTFGGFPES-PPPCPPHGGSRVPSTF  
 GSKRRLSSEDSSLEPDLAEMSLDDSSLALGAEASTFGGFPES-PPPCPPHGGSRGPSTF  
 GSKRRLSSEDSSLEPDLAEMSLDDSSLALGAEASTFGGFPES-PPPCPLHGGSRGPSAF  
 GSKRRLSSEDSSLEPDLAEMSLDDSSLALGAEASTFGGFPES-PPPCPLHGGSRGPSTF  
 GSKRRLSSEDSSLEPDLAEMSLDDSSLALGAEASTFGGFPES-PPPCPLHGGSRGPSTF  
 GSKRRLSSEDSSLEPDLAEMSLDDSSLALGAEASTFGGFPES-PPPCPLHGGSRGPSTF  
 GSKRRLSSEDSSLEPDLAEMSLDDSSLALGAEASTFGGFPES-PPPCPLHGGSRGPSTF  
 GSKRRLSSEDSSLEPDLAEMSLDDSSLALGAEASTFGGFPES-PPPCPLHSGSRGPSTF  
 GSKRRLSSEDSSLEPDLAEMSLDDSSLALGAEASTFGGFPES-PPPCPPPGGSRGASTF

0123456789012345678901234567890123456789012-3456789012345678  
 600 1 2 3 4 5

Brachyteles\_arachnoides  
 Callithrix\_jacchus  
 Aotus\_nancymae  
 Cebus\_capucinus\_imitator  
 Saimiri\_boliviensis  
 Macaca\_nemestrina  
 Papio\_anubis  
 Chlorocebus\_sabaeus  
 Homo\_sapiens  
 Pongo\_abelii  
 Otolemur\_garnetti

\* \*  
 LPESPDTYEEDGGVYFSEGPEPPTASAGPPGLLPGEVCTRDDL PSTDESGSGLPKAKEAA  
 LPEPDTYEEDGGVYFSEGPEPPTASAGPPGLLPGEICTRDDL PSTDESGSGLPKTKEAA  
 LPEPDTYEEDGGVYFSEGPEPPTV SAGPPGLLPGEICTRDDL PSTDESGSGLPKAKEAA  
 LPEPDTYEEDGGVYFSEGPEPPTASAGPPGLLPGEVCTRDDLPSADESGSGLPQTKEAA  
 LPEPDTYEEDGGVYFSEGPEPPTASAGPPGLLPGEVCTRDDL PSTDESGSGLPQTKEAV  
 LPEPDTYEEDGGVYFSEGPEPPTASAGPPGLLPGDVCTRDDVPSTDESGSGLPKTKEAA  
 LPESPDTYEEDGGVYFSEGPEPPTT SAGPPGLLPGDVCTRDDL PSTDESGSGLPKTKEAA  
 LPEPDTYEEDGGVYFSEGPEPPTASAGPPGLLPGDVCTRDDFPSTDESGSGLPKTKEAA  
 LPEPDTYEEDGGVYFSEGPEPPTASVGPGLLPGDVCTQDDL PSTDESGNGLPKTKEAA  
 LPEPDTYEEDGGVYFSEGPEPPTASVGPGLLPGDVCTQDDL PSTDESGNGLPKTKEAA  
 LPEPDTYEEDGGVYFSEGPEPPTV SAGPSGLLPGEVCTPDDL PSTDESGNGLPKTKEVA

901234567890123456789012345678901234567890123456789012345678  
 660 7 8 9 700 1

Brachyteles\_arachnoides  
 Callithrix\_jacchus  
 Aotus\_nancymae  
 Cebus\_capucinus\_imitator  
 Saimiri\_boliviensis  
 Macaca\_nemestrina  
 Papio\_anubis  
 Chlorocebus\_sabaeus  
 Homo\_sapiens  
 Pongo\_abelii  
 Otolemur\_garnetti

PAVGEEDDDYQAYYLAQDAGGEGEEKAEGGAGEEHDLFAGLKPLEQESRMEVLFACAEA  
 PAVGEEDDDYQAYYLAQDAGGEGEEKAEGGAGEEHDLFAGLKPLEQESRMEVLFACAEA  
 PAVGEEDDDYQAYYLAQDAGGEGEEKAEGGAGEEHDLFAGLKPLEQESRMEVLFACAEA  
 PAVGEEDDDYQAYYLAQDAGGEGEEKAEGGAGEEHDLFAGLKPLEQESRMEVLFACAEA  
 PAVGEEDDDYQAYYLAQDAGGEGEEKAEGGAGEEHDLFAGLKPLEQESRMEVLFACAEA  
 PAVGEEDDDYQAYYLAQDAGGEGEEKAEGGAGEEHDLFAGLKPLEQESRMEVLFACAEA  
 PAVGEEDDDYQAYYLAQDAGGEGEEKAEGGAGEEHDLFAGLKPLEQESRMEVLFACAEA  
 PAVGEEDDDYQAYYLAQDAGGEGEEKAEGGAGEEHDLFAGLKPLEQESRMEVLFACAEA  
 PAVGEEDDDYQAYYLAQDAGGEGEEKAEGGAGEEHDLFAGLKPLEQESRMEVLFACAEA  
 PAVGEEDDDYQAYYLAQDAGGEGEEKAEGGAGEEHDLFAGLKPLEQESRMEVLFACAEA

901234567890123456789012345678901234567890123456789012345678  
 720 3 4 5 6 7

Brachyteles\_arachnoides  
 Callithrix\_jacchus  
 Aotus\_nancymae  
 Cebus\_capucinus\_imitator  
 Saimiri\_boliviensis  
 Macaca\_nemestrina  
 Papio\_anubis  
 Chlorocebus\_sabaeus  
 Homo\_sapiens  
 Pongo\_abelii  
 Otolemur\_garnetti

LHAHGYSNEASRLTVELAQDLLANPPDLKVEPPPAKGKKNKVSTSRQTWATNTLSKA AF  
 LHAHGYSSEASRLTVELAQDLLANPPDLKVEPPPAKGKKNKVSTSRQTWATNTLSKA AF  
 LHAHGYSSEASRLTVELAQDLLANPPDLKVEPPPAKGKKNKVSTSRQTWATNTLSKA AF  
 LHAHGYSSEASRLTVELAQDLLANPPDLKVEPPPAKGKKNKVSTSRQTWATNTLSKA AF  
 LHAHGYSNEASRLTVELAQDLLANPPDLKVEPPPAKGKKNKVSTSRQTWATNTLSKA AF  
 LHAHGYSNEASRLTVELAQDLLANPPDLKVEPPPAKGKKNKVSTSRQTWATNTLSKA AF  
 LHAHGYSSEASRLTVELAQDLLANPPDLKVEPPPAKGKKNKVSTSRQTWATNTLSKA AF  
 LHAHGYSNEASRLTVELAQDLLANPPDLKVEPPPAKGKKNKVSTSRQTWATNTLSKA AF  
 LHAHGYSSEASRLTVELAQDLLANPPDLKVEPPPAKGKKNKVSTSRQTWATNTLSKA AF  
 LHAHGYSNEASRLTVELAQDLLANPPDLKVEPPPAKGKKNKVSTSRQTWATNTLSKA AF

901234567890123456789012345678901234567890123456789012345678  
 780 9 800 1 2 3

Brachyteles\_arachnoides  
 Callithrix\_jacchus  
 Aotus\_nancymae  
 Cebus\_capucinus\_imitator  
 Saimiri\_boliviensis  
 Macaca\_nemestrina  
 Papio\_anubis  
 Chlorocebus\_sabaeus  
 Homo\_sapiens  
 Pongo\_abelii  
 Otolemur\_garnetti

LLTVLSERPEHHNLAFRVGMFALELQRPPASTKALEVKLAYQESEVAALLKKIPLGPSEM  
 LLTVLSERPEHHNLAFRVGMFALELQRPPASTKALEVKLAYQESEVAALLKKIPLGPSEM  
 LLTVLSERPEHHNLAFRVGMFALELQRPPASTKALEVKLAYQESEVAALLKKIPLGPSEM  
 LLTVLSERPEHHNLAFRVGMFALELQRPPASTKALEVKLAYQESEVAALLKKIPLGPSEM  
 LLTVLSERPEHHNLAFRVGMFALELQRPPASTKALEVKLAYQESEVAALLKKIPLGPSEM  
 LLTVLSERPEHHNLAFRVGMFALELQRPPASTKALEVKLAYQESEVAALLKKIPLGPSEM  
 LLTVLSERPEHHNLAFRVGMFALELQRPPASTKALEVKLAYQESEVAALLKKIPLGPSEM  
 LLTVLSERPEHHNLAFRVGMFALELQRPPASTKALEVKLAYQESEVAALLKKIPLGPSEM  
 LLTVLSERPEHHNLAFRVGMFALELQRPPASTKALEVKLAYQESEVAALLKKIPLGPSEM  
 LLTVLSERPEHHNLAFRVGMFALELQRPPASTKALEVKLAYQESEVAALLKKIPLGPSEM

901234567890123456789012345678901234567890123456789012345678  
 840 5 6 7 8 9







Brachyteles\_arachnoides  
 Callithrix\_jacchus  
 Aotus\_nancymaae  
 Cebus\_capucinus\_imitator  
 Saimiri\_boliviensis  
 Macaca\_nemestrina  
 Papio\_anubis  
 Chlorocebus\_sabaeus  
 Homo\_sapiens  
 Pongo\_abelii  
 Otolemur\_garnetti

890123456789012345678901234567890123456789012345678901234567  
 1500 1 2 3 4 5

Brachyteles\_arachnoides  
 Callithrix\_jacchus  
 Aotus\_nancymaae  
 Cebus\_capucinus\_imitator  
 Saimiri\_boliviensis  
 Macaca\_nemestrina  
 Papio\_anubis  
 Chlorocebus\_sabaeus  
 Homo\_sapiens  
 Pongo\_abelii  
 Otolemur\_garnetti

890123456789012345678901234567890123456789012345678901234567  
 1560 7 8 9 1600 1

Brachyteles\_arachnoides  
 Callithrix\_jacchus  
 Aotus\_nancymaae  
 Cebus\_capucinus\_imitator  
 Saimiri\_boliviensis  
 Macaca\_nemestrina  
 Papio\_anubis  
 Chlorocebus\_sabaeus  
 Homo\_sapiens  
 Pongo\_abelii  
 Otolemur\_garnetti

890123456789012345678901234567890123456789012345678901234567  
 1620 3 4 5 6 7

Brachyteles\_arachnoides  
 Callithrix\_jacchus  
 Aotus\_nancymaae  
 Cebus\_capucinus\_imitator  
 Saimiri\_boliviensis  
 Macaca\_nemestrina  
 Papio\_anubis  
 Chlorocebus\_sabaeus  
 Homo\_sapiens  
 Pongo\_abelii  
 Otolemur\_garnetti

8901234567890123456789012  
 1680 9 1700
