# Supplementary material for: Transcriptome of the Southern Muriqui Brachyteles arachnoides (Primates:Platyrrhini), a Critically Endangered New World Monkey: Evidence of Adaptive Evolution
Source: Front Genet. 2020 Jul 31;11:831. doi: 10.3389/fgene.2020.00831 (PMC7412869; doi:10.3389/fgene.2020.00831)
Supplement: Supplementary file 7 [file Table_1.XLSX]

## Sheet: Sheet1
Supplementary Material 1: SRA accession numbers, numbers of raw reads, number of trimmed reads and re-mapping rates per sample.
Library	SRA	Type	Tissue	Read size	No of raw reads	No of cleaned reads	No of cleaned reads	No of cleaned reads	No of normalized reads	Re-mapping rate
					Min. / Max. / Median / Mean	(cutadapt)	(trimmomatic)	(prinseq)		(bowtie2)
RNA_CPRJ_2506_S1_L005_R1_001	SRR10907271	SE	Blood	101	113031846	112191143	92551384	92519765	16518887	96.68%
					13 / 101 / 101 / 99.6	16 / 101 / 101 / 99.7	36 / 101 / 100 / 96.7	36 / 101 / 100 / 96.7	36 / 101 / 100 / 95.9
RNA_CPRJ_2506_S1_L006_R1_001	SRR10907270	SE	Blood	101	130249755	129340756	122428072	122384861	27770956	93.1%
					13 / 101 / 101 / 99.7	16 / 101 / 101 / 99.7	36 / 101 / 100 / 93.8	36 / 101 / 100 / 93.8	36 / 101 / 100 / 88
Brachyteles_S1_L001_R1_001	SRR10907269	PE	Fibroblast	125	17561307	17558028	15264393	15220158	4457804	94.21%
					35 / 125 / 125 / 114.4	16 / 125 / 124 / 113.6	36 / 125 / 124 / 121.4	36 / 125 / 124 / 121.3	36 / 125 / 124 / 121.2
Brachyteles_S1_L001_R2_001	SRR10907269	PE	Fibroblast	125	17561307	17558028	15264393	15220158	4457804	94.21%
					35 / 125 / 125 / 114.4	16 / 125 / 124 / 113.7	36 / 125 / 124 / 121.4	36 / 125 / 124 / 121.2	36 / 125 / 124 / 121
Brachyteles_S2_L001_R1_001	SRR10907268	PE	Fibroblast	125	21765831	21759593	20459863	20381215	5286426	92.03%
					35 / 125 / 125 / 121.8	16 / 125 / 124 / 121	36 / 125 / 124 / 121.7	36 / 125 / 124 / 121.6	36 / 125 / 124 / 121.5
Brachyteles_S2_L001_R2_001	SRR10907268	PE	Fibroblast	125	21765831	21759593	20459863	20381215	5286426	92.03%
					35 / 125 / 125 / 121.8	16 / 125 / 124 / 121.1	36 / 125 / 124 / 121.6	36 / 125 / 124 / 121.6	36 / 125 / 124 / 121.4
Brachyteles_S3_L001_R1_001	SRR10907267	PE	Fibroblast	125	15731181	15726115	14721843	14661573	4239567	91.46%
					35 / 125 / 125 / 122.3	16 / 125 / 124 / 121.5	36 / 125 / 124 / 121.5	36 / 125 / 124 / 121.4	36 / 125 / 124 / 121.5
Brachyteles_S3_L001_R2_001	SRR10907267	PE	Fibroblast	125	15731181	15726115	14721843	14661573	4239567	91.46%
					35 / 125 / 125 / 122.3	16 / 125 / 124 / 121.6	36 / 125 / 124 / 121.5	36 / 125 / 124 / 121.4	36 / 125 / 124 / 121.3
TOTAL					353398239	351619371	315871654	315430518	72257437	93.5%
						99.50%	89.38%	89.26%	20.45%
