# Supplementary material for: Transcriptome of the Southern Muriqui Brachyteles arachnoides (Primates:Platyrrhini), a Critically Endangered New World Monkey: Evidence of Adaptive Evolution
Source: Front Genet. 2020 Jul 31;11:831. doi: 10.3389/fgene.2020.00831 (PMC7412869; doi:10.3389/fgene.2020.00831)
Supplement: Supplementary file 10 [file Table_5.xlsx]

## Sheet: Statistics_Overall
Supplementary Material 5: OrthoFinder Comparative Genomics Statistics. General statistics about orthogroup sizes and proportion of genes assigned to orthogroups (Overall and Per Species).
Number of species	11
Number of genes	245,988
Number of genes in orthogroups	228,456
Number of unassigned genes	17,532
Percentage of genes in orthogroups	92.9%
Percentage of unassigned genes	7.1%
Number of orthogroups	21,369
Number of species-specific orthogroups	1,537
Number of genes in species-specific orthogroups	4,403
Percentage of genes in species-specific orthogroups	1.8%
Mean orthogroup size	10.7
Median orthogroup size	11.0
Number of orthogroups with all species present	10,534
Number of single-copy orthogroups	4,101

## Sheet: Statistics_PerSpecies
Supplementary Material 5: OrthoFinder Comparative Genomics Statistics. General statistics about orthogroup sizes and proportion of genes assigned to orthogroups (Overall and Per Species).
	Aotus_nancymaae	Brachyteles_arachnoides	Callithrix_jacchus	Cebus_capucinus	Chlorocebus_sabaeus	Homo_sapiens	Macaca_nemestrina	Otolemur_garnettii	Papio_anubis	Pongo_abelii	Saimiri_boliviensis_boliviensis
Number of genes	20412	37987	22615	20317	19165	23475	21060	19506	21647	20424	19380
Number of genes in orthogroups	20033	25464	21662	19990	18917	22925	20691	19130	21187	19318	19139
Number of unassigned genes	379	12523	953	327	248	550	369	376	460	1106	241
Percentage of genes in orthogroups	98.1	67.0	95.8	98.4	98.7	97.7	98.2	98.1	97.9	94.6	98.8
Percentage of unassigned genes	1.9	33.0	4.2	1.6	1.3	2.3	1.8	1.9	2.1	5.4	1.2
Number of orthogroups containing species	16867	14040	17233	16904	16833	17338	17877	16165	17995	16744	16607
Percentage of orthogroups containing species	78.9	65.7	80.6	79.1	78.8	81.1	83.7	75.6	84.2	78.4	77.7
Number of species-specific orthogroups	11	1230	82	13	5	64	9	29	15	74	5
Number of genes in species-specific orthogroups	23	3099	549	42	21	227	21	181	35	195	10
Percentage of genes in species-specific orthogroups	0.1	8.2	2.4	0.2	0.1	1.0	0.1	0.9	0.2	1.0	0.1
