# Supplementary material for: Transcriptome of the Southern Muriqui Brachyteles arachnoides (Primates:Platyrrhini), a Critically Endangered New World Monkey: Evidence of Adaptive Evolution
Source: Front Genet. 2020 Jul 31;11:831. doi: 10.3389/fgene.2020.00831 (PMC7412869; doi:10.3389/fgene.2020.00831)
Supplement: Supplementary file 11 [file Table_6.xlsx]

## Sheet: Página1
Supplementary Material 6: Information on the 30 genes identified as evolving under adaptive selection in B. arachnoides. Likelihood ratio test and adjusted p-value for each model tested. Annotation of human ortholog proteins, their GO terms and pathways.
	ABSREL			BUSTED			CODEML			Human ortholog				GO terms				Reactome		PANTHER
Transcript ID	LTR	adj. p-value		LTR	adj. p-value		LTR	adj p-value		UNIPROT ID	Gene	Protein		Molecular Function	Biological Process	Cellular Component		Pathway		Protein Class	Pathway
TRINITY_DN906_c0_g1_i16	15.5255721624	0.0001		5.897083055	0.0262		10.754912	0.00620533		A7E2V4	ZSWIM8	Zinc finger SWIM domain-containing protein 8		zinc ion binding(GO:0008270)	regulation of axon guidance(GO:1902667)	Cul2-RING ubiquitin ligase complex(GO:0031462)		Developmental Biology;Signaling by ROBO receptors;Regulation of expression of SLITs and ROBOs;Axon guidance
TRINITY_DN4180_c0_g1_i3	29.3169873319	0		10.08639165	0.0032		16.567212	0.000700487		Q30167	HLA-DRB1	HLA class II histocompatibility antigen, DRB1 beta chain			antigen processing and presentation (GO:0019882);immune response (GO:0006955)	MHC class II protein complex (GO:0042613);membrane (GO:0016020)		Downstream TCR signaling;Phosphorylation of CD3 and TCR zeta chains;Translocation of ZAP-70 to Immunological synapse;Generation of second messenger molecules;MHC class II antigen presentation;PD-1 signaling;Interferon gamma signaling		HLA class II histocompatibility antigen, DRB1 beta chain (PC00149)
TRINITY_DN606_c0_g2_i3	100.6087512311	0		14.25941107	0.0004		111.477932	0		P11215	ITGAM	Integrin alpha-M		amyloid-beta binding(GO:0001540);complement component C3b binding(GO:0001851);protein binding(GO:0005515);heat shock protein binding(GO:0031072);cargo receptor activity(GO:0038024);metal ion binding(GO:0046872);protein heterodimerization activity(GO:0046982)	microglial cell activation(GO:0001774);receptor-mediated endocytosis(GO:0006898);phagocytosis, engulfment(GO:0006911);cell adhesion(GO:0007155);integrin-mediated signaling pathway(GO:0007229);ectodermal cell differentiation(GO:0010668);cytokine-mediated signaling pathway(GO:0019221);extracellular matrix organization(GO:0030198);forebrain development(GO:0030900);positive regulation of superoxide a…	extracellular space(GO:0005615);plasma membrane(GO:0005886);integrin complex(GO:0008305);external side of plasma membrane(GO:0009897);cell surface(GO:0009986);integral component of membrane(GO:0016021);integrin alphaM-beta2 complex(GO:0034688);specific granule membrane(GO:0035579);plasma membrane raft(GO:0044853);extracellular exosome(GO:0070062);tertiary granule membrane(GO:0070821)		Extracellular matrix organization;Toll Like Receptor 4 (TLR4) Cascade;Cytokine Signaling in Immune system;Toll-Like Receptors Cascades;Neutrophil degranulation;Signaling by Interleukins;Integrin cell surface interactions;Immune System;Hemostasis;Interleukin-4 and Interleukin-13 signaling;Innate Immune System;Cell surface interactions at the vascular wall			Inflammation mediated by chemokine and cytokine signaling pathway->Integrin;;Integrin signalling pathway->Integrin alpha;;;
TRINITY_DN1923_c0_g1_i2	144.3338799195	0		45.71306931	0		9.437502	0.0106903		P13688	CEACAM1	Carcinoembryonic antigen-related cell adhesion molecule 1		molecular_function(GO:0003674);actin binding(GO:0003779);protein binding(GO:0005515);calmodulin binding(GO:0005516);bile acid transmembrane transporter activity(GO:0015125);kinase binding(GO:0019900);protein phosphatase binding(GO:0019903);filamin binding(GO:0031005);identical protein binding(GO:0042802);protein homodimerization activity(GO:0042803);protein dimerization activity(GO:0046983);prote…	angiogenesis(GO:0001525);regulation of cell growth(GO:0001558);blood vessel development(GO:0001568);negative regulation of T cell mediated cytotoxicity(GO:0001915);negative regulation of natural killer cell mediated cytotoxicity directed against tumor cell target(GO:0002859);negative regulation of protein kinase activity(GO:0006469);cell adhesion(GO:0007155);homophilic cell adhesion via plasma me…	plasma membrane(GO:0005886);integral component of plasma membrane(GO:0005887);cell-cell junction(GO:0005911);adherens junction(GO:0005912);basal plasma membrane(GO:0009925);cell surface(GO:0009986);membrane(GO:0016020);integral component of membrane(GO:0016021);apical plasma membrane(GO:0016324);lateral plasma membrane(GO:0016328);cell junction(GO:0030054);transport vesicle membrane(GO:0030658);m…		Immune System;Fibronectin matrix formation;Hemostasis;Cell surface interactions at the vascular wall;Innate Immune System;Extracellular matrix organization;Neutrophil degranulation
TRINITY_DN51068_c0_g1_i2	14.3447302445	0.0003		10.43176111	0.0027		10.957814	0.00595878		P29728	OAS2	2'-5'-oligoadenylate synthase 2		2'-5'-oligoadenylate synthetase activity(GO:0001730);double-stranded RNA binding(GO:0003725);protein binding(GO:0005515);ATP binding(GO:0005524);transferase activity(GO:0016740);nucleotidyltransferase activity(GO:0016779);metal ion binding(GO:0046872)	nucleobase-containing compound metabolic process(GO:0006139);RNA catabolic process(GO:0006401);immune response(GO:0006955);response to virus(GO:0009615);response to bacterium(GO:0009617);defense response to virus(GO:0051607);interferon-gamma-mediated signaling pathway(GO:0060333);type I interferon signaling pathway(GO:0060337);regulation of ribonuclease activity(GO:0060700);regulation of lactatio…	nucleus(GO:0005634);nucleoplasm(GO:0005654);cytoplasm(GO:0005737);cytosol(GO:0005829);membrane(GO:0016020);intracellular membrane-bounded organelle(GO:0043231);perinuclear region of cytoplasm(GO:0048471)		Immune System;Interferon gamma signaling;Cytokine Signaling in Immune system;Interferon alpha/beta signaling;Interferon Signaling		defense/immunity protein(PC00090);nucleic acid binding(PC00171);nucleotidyltransferase(PC00174)
TRINITY_DN32522_c1_g1_i1	10.7700879593	0.0016		5.758385753	0.0281		9.416474	0.0106903		P60891	PRPS1	Ribose-phosphate pyrophosphokinase 1		magnesium ion binding(GO:0000287);ribose phosphate diphosphokinase activity(GO:0004749);protein binding(GO:0005515);ATP binding(GO:0005524);kinase activity(GO:0016301);identical protein binding(GO:0042802);protein homodimerization activity(GO:0042803)	5-phosphoribose 1-diphosphate biosynthetic process(GO:0006015);purine nucleobase metabolic process(GO:0006144);purine nucleotide biosynthetic process(GO:0006164);pyrimidine nucleotide biosynthetic process(GO:0006221);nervous system development(GO:0007399);nucleoside metabolic process(GO:0009116);ribonucleoside monophosphate biosynthetic process(GO:0009156);nucleotide biosynthetic process(GO:00091…	ribose phosphate diphosphokinase complex(GO:0002189);cytoplasm(GO:0005737);cytosol(GO:0005829)		Metabolism of carbohydrates;Pentose phosphate pathway;5-Phosphoribose 1-diphosphate biosynthesis;Metabolism		carbohydrate kinase(PC00065);ligase(PC00142);nucleotide kinase(PC00172)
TRINITY_DN2283_c0_g1_i10	9.2351520821	0.0034		4.935657433	0.0424		8.520522	0.0157162		Q14692	BMS1	Ribosome biogenesis protein BMS1 homolog		RNA binding(GO:0003723);GTPase activity(GO:0003924);ATP binding(GO:0005524);GTP binding(GO:0005525);U3 snoRNA binding(GO:0034511)	maturation of SSU-rRNA from tricistronic rRNA transcript (SSU-rRNA, 5.8S rRNA, LSU-rRNA)(GO:0000462);rRNA processing(GO:0006364)	nucleus(GO:0005634);nucleoplasm(GO:0005654);nucleolus(GO:0005730);90S preribosome(GO:0030686)		Metabolism of RNA;rRNA processing in the nucleus and cytosol;rRNA processing;rRNA modification in the nucleus and cytosol;Major pathway of rRNA processing in the nucleolus and cytosol
TRINITY_DN5901_c0_g1_i9	8.1873800773	0.0058		7.642270319	0.011		6.837734	0.0295847		Q9Y2R4	DDX52	Probable ATP-dependent RNA helicase DDX52		RNA binding(GO:0003723);RNA helicase activity(GO:0003724);ATP binding(GO:0005524)	rRNA processing(GO:0006364);maturation of SSU-rRNA(GO:0030490)	nucleoplasm(GO:0005654);nucleolus(GO:0005730);membrane(GO:0016020)		Metabolism of RNA;rRNA processing in the nucleus and cytosol;rRNA processing;rRNA modification in the nucleus and cytosol;Major pathway of rRNA processing in the nucleolus and cytosol
TRINITY_DN7168_c0_g1_i1	15.7213502881	0.0001		11.40932611	0.0017		14.456426	0.00160429		O60783	MRPS14	28S ribosomal protein S14, mitochondrial		RNA binding(GO:0003723);structural constituent of ribosome(GO:0003735)	translation(GO:0006412);mitochondrial translational elongation(GO:0070125);mitochondrial translational termination(GO:0070126)	mitochondrial inner membrane(GO:0005743);mitochondrial ribosome(GO:0005761);mitochondrial small ribosomal subunit(GO:0005763)		Mitochondrial translation elongation;Mitochondrial translation termination;Mitochondrial translation;Translation;Mitochondrial translation initiation;Metabolism of proteins		ribosomal protein(PC00202)
TRINITY_DN11222_c0_g1_i1	16.5240381264	0.0001		9.645934015	0.004		7.842506	0.0204722		P35610	SOAT1	Sterol O-acyltransferase 1		fatty-acyl-CoA binding(GO:0000062);sterol O-acyltransferase activity(GO:0004772);protein binding(GO:0005515);O-acyltransferase activity(GO:0008374);cholesterol binding(GO:0015485);cholesterol O-acyltransferase activity(GO:0034736)	cholesterol metabolic process(GO:0008203);macrophage derived foam cell differentiation(GO:0010742);cholesterol storage(GO:0010878);cholesterol efflux(GO:0033344);very-low-density lipoprotein particle assembly(GO:0034379);low-density lipoprotein particle clearance(GO:0034383);cholesterol esterification(GO:0034435);cholesterol homeostasis(GO:0042632);positive regulation of amyloid precursor protein…	endoplasmic reticulum(GO:0005783);endoplasmic reticulum membrane(GO:0005789);membrane(GO:0016020);integral component of membrane(GO:0016021)		Plasma lipoprotein assembly, remodeling, and clearance;Plasma lipoprotein clearance;LDL clearance;Transport of small molecules		acyltransferase(PC00042)	Androgen/estrogene/progesterone biosynthesis->Cholesterol acyltransferase;;
TRINITY_DN4104_c0_g1_i3	6.3133842102	0.0152		5.309313681	0.0352		7.344368	0.0240827		Q16610	ECM1	Extracellular matrix protein 1		protease binding(GO:0002020);interleukin-2 receptor binding(GO:0005134);extracellular matrix structural constituent(GO:0005201);protein binding(GO:0005515);protein C-terminus binding(GO:0008022);enzyme binding(GO:0019899);laminin binding(GO:0043236)	ossification(GO:0001503);angiogenesis(GO:0001525);positive regulation of endothelial cell proliferation(GO:0001938);negative regulation of cytokine-mediated signaling pathway(GO:0001960);chondrocyte development(GO:0002063);platelet degranulation(GO:0002576);regulation of type 2 immune response(GO:0002828);endochondral bone growth(GO:0003416);regulation of transcription by RNA polymerase II(GO:000…	extracellular region(GO:0005576);extracellular matrix(GO:0031012);platelet dense granule lumen(GO:0031089);collagen-containing extracellular matrix(GO:0062023);extracellular exosome(GO:0070062)		Response to elevated platelet cytosolic Ca2+;Hemostasis;Platelet activation, signaling and aggregation;Platelet degranulation
TRINITY_DN13052_c0_g3_i5	104.5208570128	0		16.91806324	0.0001		22.054686	5.93e-05		Q9HBM6	TAF9B	Transcription initiation factor TFIID subunit 9B		transcription corepressor activity(GO:0003714);histone acetyltransferase activity(GO:0004402);protein binding(GO:0005515);transcription factor binding(GO:0008134);transcription regulatory region DNA binding(GO:0044212);protein heterodimerization activity(GO:0046982)	negative regulation of transcription by RNA polymerase II(GO:0000122);transcription by RNA polymerase II(GO:0006366);transcription initiation from RNA polymerase II promoter(GO:0006367);protein deubiquitination(GO:0016579);positive regulation of cell growth(GO:0030307);negative regulation of apoptotic process(GO:0043066);histone H3 acetylation(GO:0043966);positive regulation of transcription by R…	SAGA complex(GO:0000124);nucleoplasm(GO:0005654);transcription factor TFIID complex(GO:0005669);transcription factor TFTC complex(GO:0033276)		RNA Polymerase II Pre-transcription Events;HIV Infection;Disease;Infectious disease;Regulation of TP53 Activity;Post-translational protein modification;Gene expression (Transcription);RNA Polymerase II Transcription Initiation And Promoter Clearance;Regulation of TP53 Activity through Phosphorylation;Transcriptional Regulation by TP53;RNA Polymerase II Transcription Initiation;RNA Polymerase II T…		nucleic acid binding(PC00171);transcription factor(PC00218)	General transcription regulation->TBP-associated factors;;Transcription regulation by bZIP transcription factor->TBP-associated factors;;;
TRINITY_DN16152_c0_g1_i12	9.309400275	0.0033		7.164795964	0.0139		11.29197	0.00567705		O43278	SPINT1	Kunitz-type protease inhibitor 1		serine-type endopeptidase inhibitor activity(GO:0004867)	neural tube closure(GO:0001843);negative regulation of endopeptidase activity(GO:0010951);extracellular matrix organization(GO:0030198);positive regulation of glial cell differentiation(GO:0045687);branching involved in labyrinthine layer morphogenesis(GO:0060670);placenta blood vessel development(GO:0060674);cellular response to BMP stimulus(GO:0071773);negative regulation of neural precursor ce…	extracellular region(GO:0005576);extracellular space(GO:0005615);plasma membrane(GO:0005886);membrane(GO:0016020);integral component of membrane(GO:0016021);extracellular exosome(GO:0070062)		Signal Transduction;MET Receptor Activation;Signaling by MET;Signaling by Receptor Tyrosine Kinases;Signaling by MST1
TRINITY_DN6225_c1_g1_i4	11.5737872372	0.0011		8.188196393	0.0083		7.638294	0.0213085		P20718	GZMH	Granzyme H		serine-type endopeptidase activity(GO:0004252);protein binding(GO:0005515);serine-type peptidase activity(GO:0008236)	proteolysis(GO:0006508);apoptotic process(GO:0006915);granzyme-mediated apoptotic signaling pathway(GO:0008626);cytolysis(GO:0019835);natural killer cell mediated cytotoxicity(GO:0042267);positive regulation of protein insertion into mitochondrial membrane involved in apoptotic signaling pathway(GO:1900740)	immunological synapse(GO:0001772);nucleus(GO:0005634);cytoplasm(GO:0005737);mitochondrion(GO:0005739);cytosol(GO:0005829);membrane(GO:0016020)		Signaling by NOTCH2;Intrinsic Pathway for Apoptosis;Programmed Cell Death;Signaling by NOTCH;Apoptosis;Signal Transduction;NOTCH2 intracellular domain regulates transcription;Activation, myristolyation of BID and translocation to mitochondria		serine protease(PC00203)	Apoptosis signaling pathway->Granzyme B;;
TRINITY_DN3793_c0_g3_i1	10.6876643572	0.0016		6.131661777	0.0233		11.184942	0.00567705		O95292	VAPB	Vesicle-associated membrane protein-associated protein B/C		protein binding(GO:0005515);microtubule binding(GO:0008017);enzyme binding(GO:0019899);FFAT motif binding(GO:0033149);protein homodimerization activity(GO:0042803);cadherin binding(GO:0045296);protein heterodimerization activity(GO:0046982);beta-tubulin binding(GO:0048487)	cellular calcium ion homeostasis(GO:0006874);endoplasmic reticulum to Golgi vesicle-mediated transport(GO:0006888);endoplasmic reticulum organization(GO:0007029);modulation by virus of host morphology or physiology(GO:0019048);sphingolipid biosynthetic process(GO:0030148);endoplasmic reticulum unfolded protein response(GO:0030968);IRE1-mediated unfolded protein response(GO:0036498);negative regul…	Golgi membrane(GO:0000139);cytoplasm(GO:0005737);endoplasmic reticulum(GO:0005783);endoplasmic reticulum membrane(GO:0005789);Golgi apparatus(GO:0005794);plasma membrane(GO:0005886);integral component of membrane(GO:0016021)		Sphingolipid de novo biosynthesis;Metabolism of lipids;Sphingolipid metabolism;Metabolism		membrane trafficking regulatory protein(PC00151)
TRINITY_DN14139_c0_g1_i3	8.8725572577	0.0041		5.143994689	0.0382		5.889554	0.0425964		O14829	PPEF1	Serine/threonine-protein phosphatase with EF-hands 1		phosphoprotein phosphatase activity(GO:0004721);protein serine/threonine phosphatase activity(GO:0004722);iron ion binding(GO:0005506);calcium ion binding(GO:0005509);manganese ion binding(GO:0030145)	protein dephosphorylation(GO:0006470);regulation of rhodopsin mediated signaling pathway(GO:0022400);detection of stimulus involved in sensory perception(GO:0050906)	nucleus(GO:0005634);cytosol(GO:0005829)		The phototransduction cascade;GPCR downstream signalling;Signaling by GPCR;Signal Transduction;G alpha (i) signalling events;Visual phototransduction;Inactivation, recovery and regulation of the phototransduction cascade
TRINITY_DN1552_c0_g1_i6	13.1657087412	0.0005		7.390021022	0.0124		13.590986	0.00226037		Q14814	MEF2D	Myocyte-specific enhancer factor 2D		RNA polymerase II regulatory region sequence-specific DNA binding(GO:0000977);RNA polymerase II proximal promoter sequence-specific DNA binding(GO:0000978);DNA-binding transcription factor activity, RNA polymerase II-specific(GO:0000981);DNA-binding transcription activator activity, RNA polymerase II-specific(GO:0001228);DNA-binding transcription factor activity(GO:0003700);protein binding(GO:000…	osteoblast differentiation(GO:0001649);endochondral ossification(GO:0001958);chondrocyte differentiation(GO:0002062);apoptotic process(GO:0006915);nervous system development(GO:0007399);adult heart development(GO:0007512);muscle organ development(GO:0007517);skeletal muscle cell differentiation(GO:0035914);positive regulation of transcription by RNA polymerase II(GO:0045944);positive regulation o…	nuclear chromatin(GO:0000790);nucleus(GO:0005634);nucleoplasm(GO:0005654);cytoplasm(GO:0005737);intracellular membrane-bounded organelle(GO:0043231)		Transcriptional activation of mitochondrial biogenesis;Mitochondrial biogenesis;Developmental Biology;Myogenesis;CDO in myogenesis;Circadian Clock;Organelle biogenesis and maintenance		MADS box transcription factor(PC00250)	CCKR signaling map->MEF2;;p38 MAPK pathway->myocyte enhancer factor 2;;CCKR signaling map->MEF2D;;;;
TRINITY_DN13987_c0_g1_i3	5.8862916123	0.0189		4.663767301	0.0486		6.177354	0.0386043		Q16348	SLC15A2	Solute carrier family 15 member 2		protein binding(GO:0005515);peptide:proton symporter activity(GO:0015333);transmembrane transporter activity(GO:0022857);oligopeptide transmembrane transporter activity(GO:0035673);dipeptide transmembrane transporter activity(GO:0071916);peptide transmembrane transporter activity(GO:1904680)	ion transport(GO:0006811);oligopeptide transport(GO:0006857);protein transport(GO:0015031);dipeptide transmembrane transport(GO:0035442);transmembrane transport(GO:0055085);proton transmembrane transport(GO:1902600);xenobiotic detoxification by transmembrane export across the plasma membrane(GO:1990961)	plasma membrane(GO:0005886);integral component of plasma membrane(GO:0005887);integral component of membrane(GO:0016021);extracellular exosome(GO:0070062)		Transport of inorganic cations/anions and amino acids/oligopeptides;SLC-mediated transmembrane transport;Proton/oligopeptide cotransporters;Transport of small molecules		transporter(PC00227)
TRINITY_DN3668_c1_g1_i3	11.199368721	0.0013		11.18900601	0.0019		9.15129	0.0117057		Q8NCP5	ZBTB44	Zinc finger and BTB domain-containing protein 44		DNA-binding transcription factor activity, RNA polymerase II-specific(GO:0000981);nucleic acid binding(GO:0003676);DNA binding(GO:0003677);protein binding(GO:0005515);metal ion binding(GO:0046872)	regulation of transcription by RNA polymerase II(GO:0006357)	nucleus(GO:0005634)				KRAB box transcription factor(PC00029)
TRINITY_DN31756_c0_g1_i9	8.9562810107	4		7.506657813	0.0117		15.6452	0.000976956		Q9H5N1	RABEP2	Rab GTPase-binding effector protein 2		GTPase activator activity(GO:0005096);protein binding(GO:0005515);growth factor activity(GO:0008083)	endocytosis(GO:0006897);signal transduction(GO:0007165);protein transport(GO:0015031);cell projection organization(GO:0030030);positive regulation of GTPase activity(GO:0043547);regulation of cilium assembly(GO:1902017)	early endosome(GO:0005769);centrosome(GO:0005813);cytosol(GO:0005829);ciliary basal body(GO:0036064);intracellular membrane-bounded organelle(GO:0043231)
TRINITY_DN6025_c0_g1_i11	27.4929280899	0		8.835404233	0.006		12.716244	0.00324437		Q9UPI3	FLVCR2	Feline leukemia virus subgroup C receptor-related protein 2		heme transporter activity(GO:0015232);heme binding(GO:0020037)	transmembrane transport(GO:0055085);heme export(GO:0097037)	plasma membrane(GO:0005886);integral component of membrane(GO:0016021)				transporter(PC00227)
TRINITY_DN4234_c0_g1_i4	20.7832822235	0		11.49437634	0.0016		17.595768	0.000489028		Q6ZS10	CLEC17A	C-type lectin domain family 17, member A		mannose binding(GO:0005537);fucose binding(GO:0042806);metal ion binding(GO:0046872)		cell surface(GO:0009986);integral component of membrane(GO:0016021)				cell adhesion molecule(PC00069);immunoglobulin receptor superfamily(PC00124)
TRINITY_DN1322_c0_g1_i12	148.8391785517	0		19.23068769	0		6.852052	0.0295847		A0JNW5	UHRF1BP1L	UHRF1-binding protein 1-like		protein binding(GO:0005515);protein homodimerization activity(GO:0042803);GARP complex binding(GO:0062069)		early endosome(GO:0005769);cytosol(GO:0005829)
TRINITY_DN1445_c0_g1_i2	8.7365188172	0.0044		5.838480789	0.027		12.176516	0.00393719		Q9UKA4	AKAP11	A-kinase anchor protein 11		protein binding(GO:0005515);protein phosphatase 1 binding(GO:0008157);protein kinase A binding(GO:0051018)	protein localization(GO:0008104);intracellular signal transduction(GO:0035556)	nucleolus(GO:0005730);cytoplasm(GO:0005737);peroxisome(GO:0005777);microtubule organizing center(GO:0005815);cytosol(GO:0005829);plasma membrane(GO:0005886)
TRINITY_DN2152_c0_g1_i2	6.2702739939	0.0155		6.379625333	0.0206		6.464964	0.0342569		Q14CS0	UBXN2B	UBX domain-containing protein 2B		protein binding(GO:0005515);ubiquitin binding(GO:0043130)	autophagosome assembly(GO:0000045);establishment of mitotic spindle orientation(GO:0000132);Golgi organization(GO:0007030);nuclear envelope reassembly(GO:0031468);proteasome-mediated ubiquitin-dependent protein catabolic process(GO:0043161);positive regulation of mitotic centrosome separation(GO:0046604);membrane fusion(GO:0061025);negative regulation of protein localization to centrosome(GO:1904…	nucleus(GO:0005634);endoplasmic reticulum(GO:0005783);Golgi apparatus(GO:0005794);cytosol(GO:0005829);spindle pole centrosome(GO:0031616)				membrane trafficking regulatory protein(PC00151)
TRINITY_DN2204_c0_g2_i3	8.6435186196	0.0046		5.100868078	0.039		6.44882	0.0342569		Q9NNZ3	DNAJC4	DnaJ homolog subfamily C member 4		protein binding(GO:0005515);unfolded protein binding(GO:0051082)	protein folding(GO:0006457);response to unfolded protein(GO:0006986)	membrane(GO:0016020);integral component of membrane(GO:0016021)
TRINITY_DN254_c0_g1_i9	11.391379887	0.0012		4.95688344	0.0419		8.329494	0.0166257		Q9HC16	APOBEC3G	DNA dC-dU-editing enzyme APOBEC-3G		RNA binding(GO:0003723);cytidine deaminase activity(GO:0004126);protein binding(GO:0005515);zinc ion binding(GO:0008270);identical protein binding(GO:0042802);protein homodimerization activity(GO:0042803);deoxycytidine deaminase activity(GO:0047844)	positive regulation of defense response to virus by host(GO:0002230);cytidine deamination(GO:0009972);negative regulation of transposition(GO:0010529);viral process(GO:0016032);base conversion or substitution editing(GO:0016553);cytidine to uridine editing(GO:0016554);negative regulation of viral genome replication(GO:0045071);innate immune response(GO:0045087);negative regulation of single stran…	P-body(GO:0000932);nucleus(GO:0005634);cytoplasm(GO:0005737);cytosol(GO:0005829);apolipoprotein B mRNA editing enzyme complex(GO:0030895);ribonucleoprotein complex(GO:1990904)				deaminase(PC00088);nucleic acid binding(PC00171)
TRINITY_DN362_c0_g4_i1	5.0045216335	0.0296		4.975973936	0.0415		6.079498	0.0394955		Q8NBR6	MINDY2	Ubiquitin carboxyl-terminal hydrolase MINDY-2		thiol-dependent ubiquitin-specific protease activity(GO:0004843);cysteine-type carboxypeptidase activity(GO:0016807);K48-linked polyubiquitin modification-dependent protein binding(GO:0036435);K63-linked polyubiquitin modification-dependent protein binding(GO:0070530);K11-linked polyubiquitin modification-dependent protein binding(GO:0071795);K6-linked polyubiquitin modification-dependent protein…	biological_process(GO:0008150);protein K48-linked deubiquitination(GO:0071108)	nucleoplasm(GO:0005654);cytosol(GO:0005829)
TRINITY_DN2002_c0_g1_i7	8.2752549998	0.0056		7.299925074	0.013		10.1478	0.00808297		Q96H72	SLC39A13	Zinc transporter ZIP13		zinc ion transmembrane transporter activity(GO:0005385);protein binding(GO:0005515);protein homodimerization activity(GO:0042803);metal ion transmembrane transporter activity(GO:0046873)	cellular zinc ion homeostasis(GO:0006882);response to zinc ion(GO:0010043);metal ion transport(GO:0030001);transmembrane transport(GO:0055085);connective tissue development(GO:0061448);zinc ion transmembrane transport(GO:0071577)	endoplasmic reticulum(GO:0005783);Golgi apparatus(GO:0005794);integral component of membrane(GO:0016021);integral component of Golgi membrane(GO:0030173);perinuclear region of cytoplasm(GO:0048471)				cation transporter(PC00068)
TRINITY_DN12059_c0_g1_i2	7.888818206	0.0068		7.7621392	0.0103		7.787348	0.0204722		Q9ULC0	EMCN	Endomucin				extracellular region(GO:0005576);plasma membrane(GO:0005886);integral component of membrane(GO:0016021)
